# Supplementary material for: Difunctionalization of unactivated olefins via selective electrochemical chlorosulfuration or chlorosulfoxidation
Source: Royal Society of Chemistry journal article supplement (doi:10.1039/d2gc02134j), 2022-01-01
Supplement: d2gc02134j1.pdf [file d2gc02134j1.pdf]

## Supporting Information

### **Difunctionalization of unactivated olefins via selective electrochemical chlorosulfuration or chlorosulfoxidation**

Pan Zhou<sup>‡</sup>, Kaikai Niu<sup>‡</sup>, Hongjian Song<sup>\*</sup>, Yuxiu Liu<sup>\*</sup> and Qingmin Wang<sup>\*</sup>

State Key Laboratory of Elemento-Organic Chemistry, Research Institute of Elemento-Organic Chemistry, College of Chemistry, Frontiers Science Center for New Organic Matter, Nankai University, Tianjin 300071, People's Republic of China  
E-mail: songhongjian@nankai.edu.cn, liuyuxiu@nankai.edu.cn, wangqm@nankai.edu.cn

## Contents

|                                                                |            |
|----------------------------------------------------------------|------------|
| <b>1. General Information.....</b>                             | <b>S3</b>  |
| <b>2. General procedure for the electrolysis.....</b>          | <b>S3</b>  |
| <b>3. Mechanistic Studies.....</b>                             | <b>S3</b>  |
| <b>4. Characterization Data for Electrolysis Products.....</b> | <b>S6</b>  |
| <b>5. Spectra of prepared compounds.....</b>                   | <b>S19</b> |
| <b>6. Reference.....</b>                                       | <b>S59</b> |

## 1. General Information

Unless otherwise noted, reagents were purchased from commercial sources and were used as received.  $^1\text{H}$  and  $^{13}\text{C}$  Nuclear Magnetic Resonance (NMR) spectra were recorded on Bruker Avance 400 Ultrashield NMR spectrometers. Chemical shifts ( $\delta$ ) were given in parts per million (ppm) and were measured downfield from internal tetramethylsilane. High-resolution mass spectrometry (HRMS) data were obtained on an FTICR-MS instrument (Ionspec 7.0 T). The melting points were determined on an X-4 microscope melting point apparatus and are uncorrected. Conversion was monitored by thin layer chromatography (TLC). Flash column chromatography was performed over silica gel (100-200 mesh).

## 2. General procedure for the electrolysis

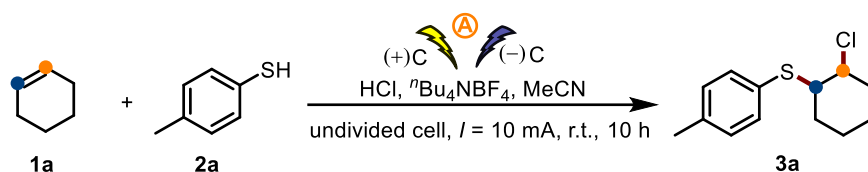

An oven-dried 10 mL undivided cell equipped with two graphite sheet electrodes (10 mm  $\times$  10 mm  $\times$  3 mm) was charged with cyclohexene (50.0  $\mu\text{L}$ , 0.5 mmol, 1.0 equiv.), *p*-toluenethiol (124.2 mg, 1.0 mmol, 2.0 equiv.), concentrated HCl (219.0  $\mu\text{L}$ , 1.0 mmol, 2.0 equiv.),  $t\text{Bu}_4\text{NBF}_4$  (329.3 mg, 1.0 mmol, 2.0 equiv.), and  $\text{CH}_3\text{CN}$  (5 mL). The stirred solution was electrolyzed at a current of 10.0 mA for 10 h at room temperature. The reaction mixture was concentrated in vacuo, and the residue was purified by column chromatography on silica gel to afford the desired product (petroleum ether/ethyl acetate).

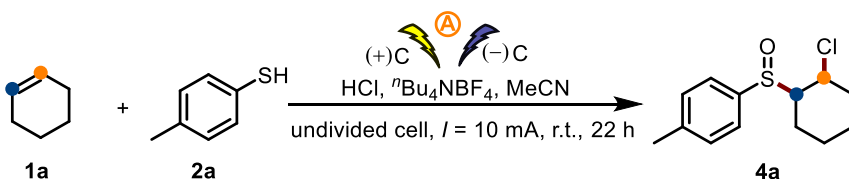

An oven-dried 10 mL undivided cell equipped with two graphite sheet electrodes (10 mm  $\times$  10 mm  $\times$  3 mm) was charged with cyclohexene (50.0  $\mu\text{L}$ , 0.5 mmol, 1.0 equiv.), *p*-toluenethiol (124.2 mg, 1.0 mmol, 2.0 equiv.), concentrated HCl (219.0  $\mu\text{L}$ , 1.0 mmol, 2.0 equiv.),  $t\text{Bu}_4\text{NBF}_4$  (329.3 mg, 1.0 mmol, 2.0 equiv.), and  $\text{CH}_3\text{CN}$  (5 mL). The stirred solution was electrolyzed at a current of 10.0 mA for 22 h at room temperature. The reaction mixture was concentrated in vacuo, and the residue was purified by column chromatography on silica gel to afford the desired product (petroleum ether/ethyl acetate). The target chlorosulfoxides were obtained as a pair of diastereoisomers since two stereogenic centers were generated. Some compounds show one point on TLC, so we give one spectrum of their isomers, while some compounds could be separated by TLC, and we give two spectra of their isomers.

## 3. Mechanistic Studies

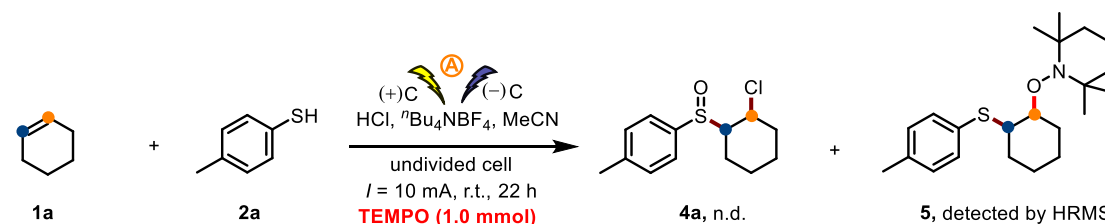

To a 10 mL oven-dried undivided bottle was added cyclohexene (50.0  $\mu\text{L}$ , 0.5 mmol, 1.0 equiv.), *p*-toluenethiol (124.2 mg, 1.0 mmol, 2.0 equiv.), concentrated HCl (219.0  $\mu\text{L}$ , 1.0 mmol, 2.0 equiv.),

<sup>n</sup>Bu<sub>4</sub>NBF<sub>4</sub> (329.3 mg, 1.0 mmol, 2.0 equiv.), TEMPO (156.3 mg, 1.0 mmol, 2.0 equiv.) and MeCN (5 mL). The stirred solution was electrolyzed at a current of 10.0 mA for 22 h at room temperature. The reaction was completely suppressed. The radical trapping product **5** can be observed by HR-MS (positive mode ESI).

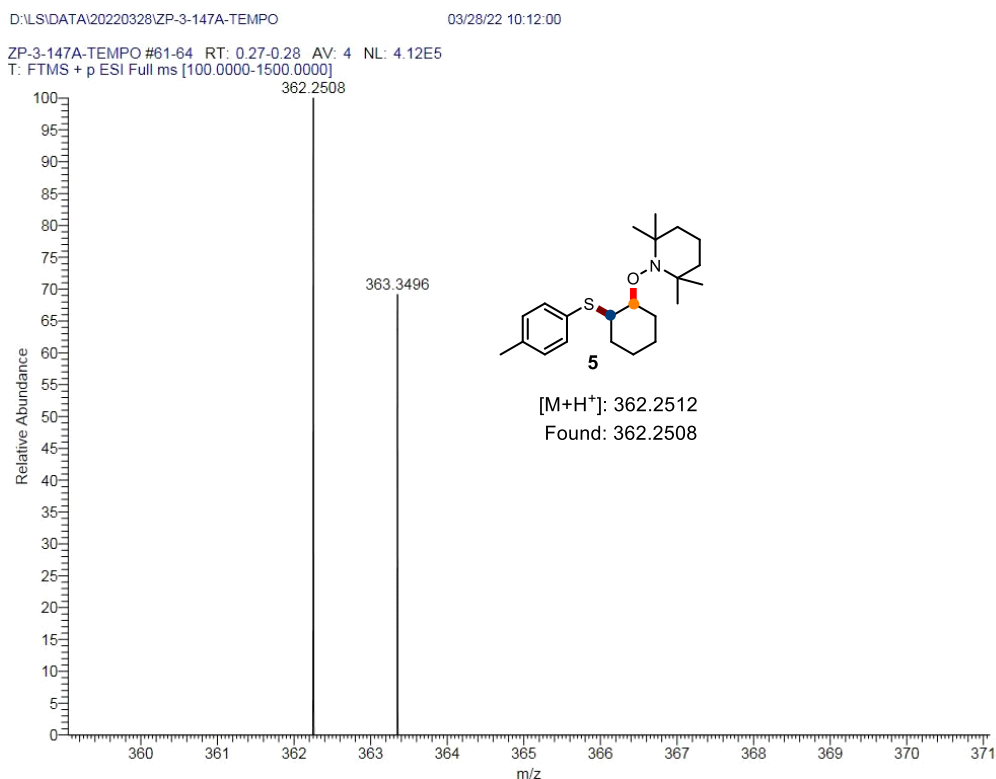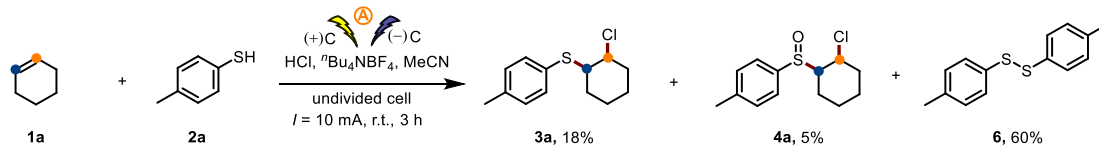

To a 10 mL oven-dried undivided bottle was added cyclohexene (50.0  $\mu$ L, 0.5 mmol, 1.0 equiv.), *p*-toluenethiol (124.2 mg, 1.0 mmol, 2.0 equiv.), concentrated HCl (219.0  $\mu$ L, 1.0 mmol, 2.0 equiv.), <sup>n</sup>Bu<sub>4</sub>NBF<sub>4</sub> (329.3 mg, 1.0 mmol, 2.0 equiv.), and MeCN (5 mL). The stirred solution was electrolyzed at a current of 10.0 mA for 3 h at room temperature. 1,2-di-*p*-tolylidysulfane **6** can be obtained in 60% isolated yield.

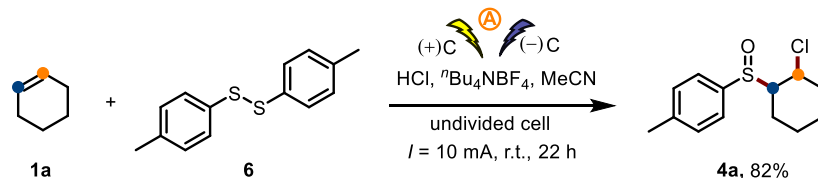

To a 10 mL oven-dried undivided bottle was added cyclohexene (50.0  $\mu$ L, 0.5 mmol, 1.0 equiv.), 1,2-di-*p*-tolylidysulfane (246.4 mg, 1.0 mmol, 2.0 equiv.), concentrated HCl (219.0  $\mu$ L, 1.0 mmol, 2.0 equiv.), <sup>n</sup>Bu<sub>4</sub>NBF<sub>4</sub> (329.3 mg, 1.0 mmol, 2.0 equiv.), and MeCN (5 mL). The stirred solution was electrolyzed at a current of 10.0 mA for 22 h at room temperature. The desired product **4a** can be obtained in 82% isolated yield.

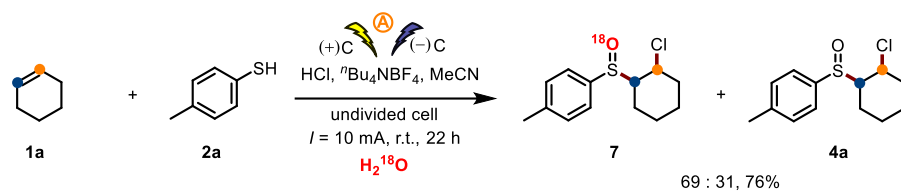

To a 10 mL oven-dried undivided bottle was added cyclohexene (50.0  $\mu\text{L}$ , 0.5 mmol, 1.0 equiv.), *p*-toluenethiol (124.2 mg, 1.0 mmol, 2.0 equiv.), concentrated HCl (219.0  $\mu\text{L}$ , 1.0 mmol, 2.0 equiv.),  $^t\text{Bu}_4\text{NBF}_4$  (329.3 mg, 1.0 mmol, 2.0 equiv.),  $\text{H}_2^{18}\text{O}$  (1.0 g) and MeCN (5 mL). The stirred solution was electrolyzed at a current of 10.0 mA for 22 h at room temperature. The desired product **4a** and compound **7** can be obtained in 69:31.

Varian QFT-ESI  
 File: zp.trans

Mode: Positive  
 Scans: 1  
 Date: 05-JUL-2022  
 Time: 15:10:57  
 Scale: 19.8103

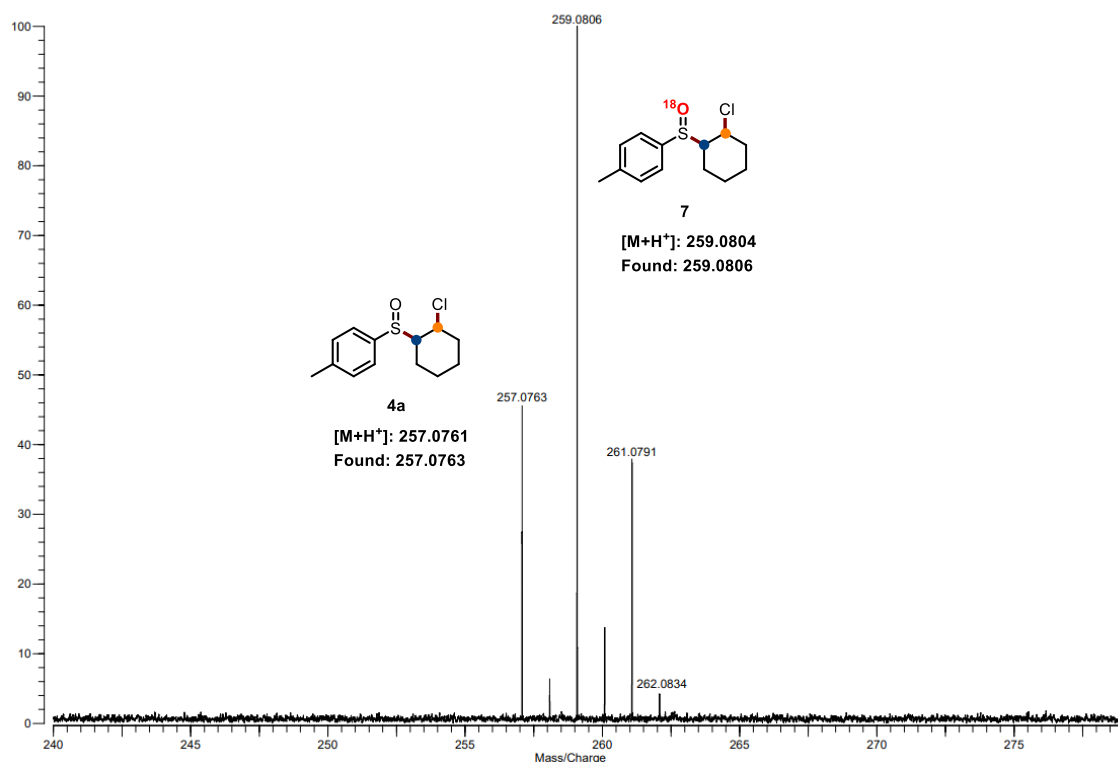

#### 4. Characterization Data for Electrolysis Products

##### ((*trans*)-2-chlorocyclohexyl)(*p*-tolyl)sulfane (**3a**)

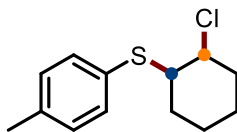

On 0.5 mmol scale. Electrolysis was conducted following the general procedure. The crude material was purified by flash column chromatography (silica gel, petroleum ether) to give **3a** as a colorless oil (89.1 mg, 74% yield).

*R<sub>f</sub>* = 0.5 (Petroleum ether);

<sup>1</sup>H NMR (400 MHz, CDCl<sub>3</sub>) δ 7.37 (d, *J* = 7.8 Hz, 2H), 7.12 (d, *J* = 7.7 Hz, 2H), 4.06 – 3.92 (m, 1H), 3.28 – 3.18 (m, 1H), 2.34 (s, 3H), 2.28 – 2.15 (m, 2H), 1.79 – 1.71 (m, 2H), 1.69 – 1.63 (m, 1H), 1.57 – 1.52 (m, 1H), 1.44 – 1.34 (m, 2H).

<sup>13</sup>C NMR (100 MHz, CDCl<sub>3</sub>) δ 137.9, 134.6, 133.6, 129.8, 62.2, 56.7, 33.8, 32.6, 26.2, 24.3, 21.1.

HRMS (ESI): Calcd for C<sub>13</sub>H<sub>18</sub>ClS<sup>+</sup> [M+H]<sup>+</sup>: 241.0812; found: 241.0810.

##### ((*trans*)-2-chlorocyclohexyl)(*o*-tolyl)sulfane (**3b**)

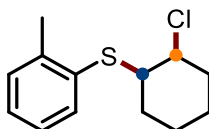

On 0.5 mmol scale. Electrolysis was conducted following the general procedure. The crude material was purified by flash column chromatography (silica gel, petroleum ether) to give **3b** as a colorless oil (77.1 mg, 64% yield).

*R<sub>f</sub>* = 0.5 (Petroleum ether);

<sup>1</sup>H NMR (400 MHz, CDCl<sub>3</sub>) δ 7.46 (d, *J* = 6.9 Hz, 1H), 7.21 (t, *J* = 5.9 Hz, 1H), 7.18 – 7.13 (m, 2H), 3.49 – 3.39 (m, 1H), 2.93 – 2.81 (m, 2H), 2.46 (s, 3H), 2.17 – 2.07 (m, 2H), 1.76 – 1.65 (m, 2H), 1.41 – 1.29 (m, 3H).

<sup>13</sup>C NMR (100 MHz, CDCl<sub>3</sub>) δ 140.4, 133.1, 133.0, 130.5, 127.5, 126.5, 72.8, 56.3, 33.9, 32.7, 26.1, 24.3, 21.2.

HRMS (ESI): Calcd for C<sub>13</sub>H<sub>18</sub>ClS<sup>+</sup> [M+H]<sup>+</sup>: 241.0812; found: 241.0812.

##### ((*trans*)-2-chlorocyclohexyl)(2,4-dimethylphenyl)sulfane (**3c**)

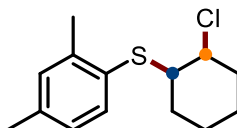

On 0.5 mmol scale. Electrolysis was conducted following the general procedure. The crude material was purified by flash column chromatography (silica gel, petroleum ether) to give **3c** as a colorless oil (95.6 mg, 75% yield).

*R<sub>f</sub>* = 0.5 (Petroleum ether);

<sup>1</sup>H NMR (400 MHz, CDCl<sub>3</sub>) δ 7.33 (d, *J* = 8.0 Hz, 1H), 7.03 (d, *J* = 8.0 Hz, 1H), 6.96 (d, *J* = 7.0 Hz, 1H), 4.07 (s, 1H), 3.25 (s, 1H), 2.42 (s, 3H), 2.29 (s, 3H), 2.22 – 2.12 (m, 1H), 1.80 – 1.56 (m, 5H), 1.42 (s, 2H).

<sup>13</sup>C NMR (100 MHz, CDCl<sub>3</sub>) δ 140.7, 137.8, 134.5, 133.8, 131.4, 127.3, 62.3, 56.8, 33.9, 32.6, 26.1, 24.3, 21.0, 20.9.

**HRMS (ESI):** Calcd for  $C_{14}H_{20}ClS^+$   $[M+H]^+$ : 255.0969; found: 255.0970.

**(4-(tert-butyl)phenyl)((trans)-2-chlorocyclohexyl)sulfane (3d)**

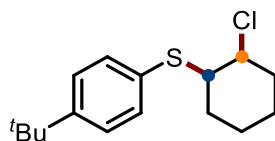

On 0.5 mmol scale. Electrolysis was conducted following the general procedure. The crude material was purified by flash column chromatography (silica gel, petroleum ether) to give **3d** as a colorless oil (69.3 mg, 49% yield).

**R<sub>f</sub>** = 0.4 (Petroleum ether);

**<sup>1</sup>H NMR (400 MHz, CDCl<sub>3</sub>)**  $\delta$  7.40 (d,  $J$  = 7.5 Hz, 2H), 7.32 (d,  $J$  = 8.5 Hz, 2H), 3.31 (td,  $J$  = 10.0, 4.3 Hz, 1H), 2.77 – 2.68 (m, 1H), 2.16 – 2.06 (m, 2H), 1.76 – 1.65 (m, 2H), 1.31 (s, 9H), 1.28 – 1.22 (m, 4H).

**<sup>13</sup>C NMR (100 MHz, CDCl<sub>3</sub>)**  $\delta$  133.9, 132.9, 128.7, 126.0, 72.0, 56.7, 34.6, 33.8, 32.7, 31.3, 26.2, 24.3.

**HRMS (ESI):** Calcd for  $C_{16}H_{24}ClS^+$   $[M+H]^+$ : 283.1282; found: 283.1283.

**((trans)-2-chlorocyclohexyl)(4-fluorophenyl)sulfane (3e)**

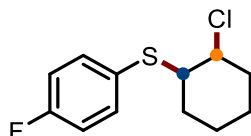

On 0.5 mmol scale. Electrolysis was conducted following the general procedure. The crude material was purified by flash column chromatography (silica gel, petroleum ether) to give **3e** as a colorless oil (80.8 mg, 66% yield).

**R<sub>f</sub>** = 0.5 (Petroleum ether);

**<sup>1</sup>H NMR (400 MHz, CDCl<sub>3</sub>)**  $\delta$  7.53 – 7.39 (m, 2H), 7.07 – 6.92 (m, 2H), 3.92 (d,  $J$  = 3.2 Hz, 1H), 3.24 – 3.02 (m, 1H), 2.42 – 2.24 (m, 1H), 2.24 – 2.06 (m, 1H), 1.80 – 1.61 (m, 3H), 1.58 – 1.48 (m, 1H), 1.43 – 1.31 (m, 2H).

**<sup>13</sup>C NMR (100 MHz, CDCl<sub>3</sub>)**  $\delta$  162.7 (d,  $J$  = 246.7 Hz), 136.0 (d,  $J$  = 8.2 Hz), 128.5, 116.1 (d,  $J$  = 21.7 Hz), 62.1, 54.0, 33.9, 30.6, 23.7, 23.3.

**<sup>19</sup>F NMR (376 MHz, CDCl<sub>3</sub>)**  $\delta$  -113.37 (s).

**HRMS (ESI):** Calcd for  $C_{12}H_{15}ClFS^+$   $[M+H]^+$ : 245.0562; found: 245.0565.

**((trans)-2-chlorocyclohexyl)(4-chlorophenyl)sulfane (3f)**

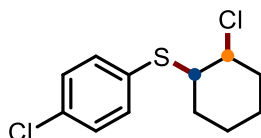

On 0.5 mmol scale. Electrolysis was conducted following the general procedure. The crude material was purified by flash column chromatography (silica gel, petroleum ether) to give **3f** as a colorless oil (81.0 mg, 62% yield).

**R<sub>f</sub>** = 0.5 (Petroleum ether);

**<sup>1</sup>H NMR (400 MHz, CDCl<sub>3</sub>)**  $\delta$  7.43 – 7.34 (m, 2H), 7.31 – 7.25 (m, 2H), 3.94 (s, 1H), 3.24 (s, 1H), 2.38 – 2.27 (m, 1H), 2.25 – 2.14 (m, 1H), 1.75 (d,  $J$  = 5.4 Hz, 2H), 1.65 (d,  $J$  = 2.9 Hz, 1H), 1.54 (d,  $J$  = 5.4 Hz, 1H), 1.39 (d,  $J$  = 3.1 Hz, 2H).

**<sup>13</sup>C NMR (100 MHz, CDCl<sub>3</sub>)**  $\delta$  134.3, 133.8, 132.3, 129.2, 62.1, 53.5, 33.8, 30.5, 23.7, 23.1.

**HRMS (ESI):** Calcd for  $C_{12}H_{15}Cl_2S^+ [M+H]^+$  : 261.0266; found: 261.0266.

**(4-bromophenyl)((trans)-2-chlorocyclohexyl)sulfane (3g)**

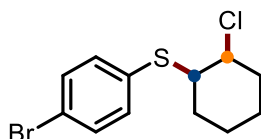

On 0.5 mmol scale. Electrolysis was conducted following the general procedure. The crude material was purified by flash column chromatography (silica gel, petroleum ether) to give **3g** as a colorless oil (76.4 mg, 50% yield).

**R<sub>f</sub>** = 0.5 (Petroleum ether);

**<sup>1</sup>H NMR (400 MHz, CDCl<sub>3</sub>)**  $\delta$  7.44 (d,  $J$  = 8.5 Hz, 2H), 7.32 (d,  $J$  = 8.5 Hz, 2H), 3.95 (td,  $J$  = 7.3, 3.8 Hz, 1H), 3.26 (td,  $J$  = 7.4, 4.3 Hz, 1H), 2.37 – 2.29 (m, 1H), 2.24 – 2.16 (m, 1H), 1.77 (m, 2H), 1.69 – 1.62 (m, 1H), 1.57 (s, 1H), 1.44 – 1.36 (m, 2H).

**<sup>13</sup>C NMR (100 MHz, CDCl<sub>3</sub>)**  $\delta$  134.4, 133.0, 132.1, 121.8, 62.1, 53.3, 33.8, 30.5, 23.6, 23.2.

**HRMS (ESI):** Calcd for  $C_{12}H_{15}BrClS^+ [M+H]^+$  : 304.9761; found: 304.9762.

**((trans)-2-chlorocyclohexyl)(4-(trifluoromethyl)phenyl)sulfane (3h)**

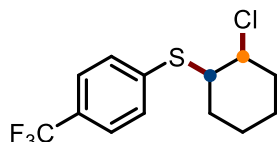

On 0.5 mmol scale. Electrolysis was conducted following the general procedure. The crude material was purified by flash column chromatography (silica gel, petroleum ether) to give **3h** as a colorless oil (75.2 mg, 51% yield).

**R<sub>f</sub>** = 0.6 (Petroleum ether);

**<sup>1</sup>H NMR (400 MHz, CDCl<sub>3</sub>)**  $\delta$  7.55 (d,  $J$  = 7.3 Hz, 2H), 7.49 (d,  $J$  = 7.0 Hz, 2H), 4.03 (s, 1H), 3.45 (s, 1H), 2.38 – 2.24 (m, 2H), 1.79 (d,  $J$  = 4.8 Hz, 2H), 1.72 – 1.57 (m, 2H), 1.44 (d,  $J$  = 5.1 Hz, 2H).

**<sup>13</sup>C NMR (100 MHz, CDCl<sub>3</sub>)**  $\delta$  139.8, 130.8, 125.9 – 125.8 (q,  $J$  = 270.0 Hz), 122.7, 61.9, 52.2, 33.5, 30.2, 23.5, 22.9.

**<sup>19</sup>F NMR (376 MHz, CDCl<sub>3</sub>)**  $\delta$  -62.55 (s).

**HRMS (ESI):** Calcd for  $C_{13}H_{15}ClF_3S^+ [M+H]^+$  : 295.0530; found: 295.0524.

**((trans)-2-chlorocyclohexyl)(4-methoxyphenyl)sulfane (3i)**

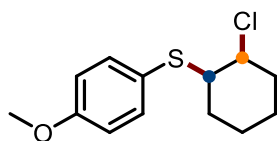

On 0.5 mmol scale. Electrolysis was conducted following the general procedure. The crude material was purified by flash column chromatography (silica gel, petroleum ether) to give **3i** as a colorless oil (81.2 mg, 64% yield).

**R<sub>f</sub>** = 0.3 (Petroleum ether);

**<sup>1</sup>H NMR (400 MHz, CDCl<sub>3</sub>)**  $\delta$  7.47 – 7.42 (m, 2H), 6.89 – 6.83 (m, 2H), 3.91 (td,  $J$  = 7.3, 3.9 Hz, 1H), 3.81 (s, 3H), 3.09 (td,  $J$  = 7.6, 4.3 Hz, 1H), 2.40 – 2.30 (m, 1H), 2.20 – 2.12 (m, 1H), 1.77 – 1.63 (m, 3H), 1.56 – 1.47 (m, 1H), 1.42 – 1.31 (m, 2H).

**<sup>13</sup>C NMR (100 MHz, CDCl<sub>3</sub>)**  $\delta$  159.9, 136.3, 123.5, 114.6, 62.3, 55.4, 54.1, 33.9, 30.6, 23.7, 23.4.

**HRMS (ESI):** Calcd for  $C_{13}H_{18}ClOS^+ [M+H]^+$  : 257.0761; found: 257.0759.



### 1-((2-chlorocyclohexyl)sulfinyl)-4-methylbenzene (**4a**)

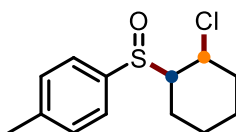

On 0.5 mmol scale. Electrolysis was conducted following the general procedure. The crude material was purified by flash column chromatography (silica gel, petroleum ether /EtOAc = 10:1) to give **4a** as a white solid (104.0 mg, 81% yield, dr = 1.2:1).

#### Diastereoisomer 1

*R<sub>f</sub>* = 0.3 (Petroleum ether /EtOAc = 10:1);

<sup>1</sup>H NMR (400 MHz, CDCl<sub>3</sub>) δ 7.43 (d, *J* = 7.8 Hz, 2H), 7.33 (d, *J* = 7.7 Hz, 2H), 4.19 (td, *J* = 10.8, 4.2 Hz, 1H), 2.51 (td, *J* = 11.3, 3.8 Hz, 1H), 2.42 (s, 3H), 1.83 – 1.57 (m, 5H), 1.33 (d, *J* = 13.4 Hz, 2H), 1.21 – 1.10 (m, 1H).

<sup>13</sup>C NMR (100 MHz, CDCl<sub>3</sub>) δ 141.0, 138.2, 129.8, 124.3, 70.4, 58.2, 37.3, 25.3, 24.0, 21.4, 20.4.

HRMS (ESI): Calcd for C<sub>13</sub>H<sub>18</sub>ClOS<sup>+</sup> [M+H]<sup>+</sup>: 257.0761; found: 257.0761.

#### Diastereoisomer 2

*M. p.* = 82-83 °C;

*R<sub>f</sub>* = 0.2 (Petroleum ether /EtOAc = 10:1);

<sup>1</sup>H NMR (400 MHz, CDCl<sub>3</sub>) δ 7.57 (d, *J* = 8.0 Hz, 2H), 7.34 (d, *J* = 7.9 Hz, 2H), 3.70 – 3.58 (m, 1H), 3.17 (td, *J* = 9.6, 3.6 Hz, 1H), 2.43 (s, 3H), 2.36 – 2.30 (m, 1H), 2.28 – 2.20 (m, 1H), 1.82 – 1.71 (m, 3H), 1.38 – 1.28 (m, 1H), 1.23 – 1.12 (m, 1H), 0.91 – 0.80 (m, 1H).

<sup>13</sup>C NMR (100 MHz, CDCl<sub>3</sub>) δ 142.1, 135.9, 129.7, 125.7, 68.1, 57.7, 36.1, 24.4, 23.7, 21.5, 21.4.

HRMS (ESI): Calcd for C<sub>13</sub>H<sub>18</sub>ClOS<sup>+</sup> [M+H]<sup>+</sup>: 257.0761; found: 257.0763.

### 1-((S)-((2-chlorocyclohexyl)sulfinyl)-2-methylbenzene (**4b**)

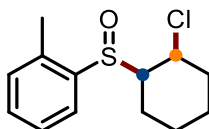

On 0.5 mmol scale. Electrolysis was conducted following the general procedure. The crude material was purified by flash column chromatography (silica gel, petroleum ether /EtOAc = 10:1) to give **4b** as a yellow oil (89.9 mg, 70% yield, dr = 1:1).

*R<sub>f</sub>* = 0.2 (Petroleum ether /EtOAc = 10:1);

<sup>1</sup>H NMR (400 MHz, CDCl<sub>3</sub>) δ 7.87 (d, *J* = 4.0 Hz, 0.5H), 7.78 (d, *J* = 6.8 Hz, 0.5H), 7.41 (t, *J* = 6.6 Hz, 2H), 7.23 (s, 1H), 4.45 (d, *J* = 4.1 Hz, 0.5H), 4.23 (td, *J* = 11.1, 4.2 Hz, 0.5H), 3.16 (d, *J* = 5.2 Hz, 0.5H), 2.60 (td, *J* = 11.5, 3.8 Hz, 0.5H), 2.48 (s, 1.5H), 2.39 (s, 1.5H), 2.35 – 2.27 (m, 0.5H), 2.24 – 2.15 (m, 0.5H), 1.96 – 1.88 (m, 0.5H), 1.85 – 1.66 (m, 3.5H), 1.50 – 1.47 (m, 1H), 1.40 – 1.30 (m, 1H), 1.28 – 1.17 (m, 1H).

<sup>13</sup>C NMR (100 MHz, CDCl<sub>3</sub>) δ 140.6, 139.1, 136.9, 134.3, 131.4, 130.9, 130.8, 130.6, 127.1, 126.4, 125.6, 125.3, 68.7, 66.6, 58.6, 56.7, 37.6, 33.0, 25.4, 24.1, 23.2, 22.5, 21.7, 20.2, 19.2, 18.2.

HRMS (ESI): Calcd for C<sub>13</sub>H<sub>18</sub>ClOS<sup>+</sup> [M+H]<sup>+</sup>: 257.0761; found: 257.0759.

### 1-((2-chlorocyclohexyl)sulfinyl)-3-methylbenzene (**4c**)

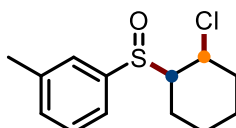

On 0.5 mmol scale. Electrolysis was conducted following the general procedure. The crude material was purified by flash column chromatography (silica gel, petroleum ether /EtOAc = 10:1) to give **4c** as a white solid (80.9 mg, 63% yield, dr = 2:1).

#### Diastereoisomer 1

*R<sub>f</sub>* = 0.3 (Petroleum ether /EtOAc = 10:1);

<sup>1</sup>H NMR (400 MHz, CDCl<sub>3</sub>) δ 7.41 (t, *J* = 7.6 Hz, 1H), 7.36 (s, 1H), 7.34 – 7.26 (m, 2H), 4.20 (td, *J* = 11.0, 4.5 Hz, 1H), 2.54 (td, *J* = 11.4, 4.1 Hz, 1H), 2.43 (s, 3H), 2.41 (s, 1H), 1.80 – 1.72 (m, 3H), 1.70 – 1.61 (m, 1H), 1.38 – 1.30 (m, 2H), 1.23 – 1.13 (m, 1H).

<sup>13</sup>C NMR (100 MHz, CDCl<sub>3</sub>) δ 141.4, 139.3, 131.4, 128.9, 124.6, 121.3, 70.4, 58.2, 37.4, 25.3, 24.0, 21.5, 20.5.

HRMS (ESI): Calcd for C<sub>13</sub>H<sub>18</sub>ClOS<sup>+</sup> [M+H]<sup>+</sup> : 257.0761; found: 257.0763.

#### Diastereoisomer 2

M. p. = 65-66 °C;

*R<sub>f</sub>* = 0.2 (Petroleum ether /EtOAc = 10:1);

<sup>1</sup>H NMR (400 MHz, CDCl<sub>3</sub>) δ 7.50 (s, 1H), 7.46 (d, *J* = 7.7 Hz, 1H), 7.41 (t, *J* = 7.5 Hz, 1H), 7.34 (d, *J* = 7.3 Hz, 1H), 3.69 (td, *J* = 9.2, 4.0 Hz, 1H), 3.18 (td, *J* = 9.6, 3.7 Hz, 1H), 2.44 (s, 3H), 2.37 – 2.30 (m, 1H), 2.29 – 2.22 (m, 1H), 1.83 – 1.72 (m, 3H), 1.39 – 1.29 (m, 1H), 1.26 – 1.17 (m, 1H), 0.92 – 0.82 (m, 1H).

<sup>13</sup>C NMR (100 MHz, CDCl<sub>3</sub>) δ 139.2, 139.0, 132.4, 128.8, 125.8, 122.8, 68.1, 57.6, 36.0, 24.3, 23.7, 21.5, 21.5.

HRMS (ESI): Calcd for C<sub>13</sub>H<sub>18</sub>ClOS<sup>+</sup> [M+H]<sup>+</sup> : 257.0761; found: 257.0760.

#### 1-((2-chlorocyclohexyl)sulfinyl)-2,4-dimethylbenzene (**4d**)

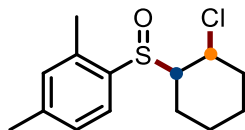

On 0.5 mmol scale. Electrolysis was conducted following the general procedure. The crude material was purified by flash column chromatography (silica gel, petroleum ether /EtOAc = 5:1) to give **4d** as a yellow oil (119.2 mg, 88% yield, dr = 1.5:1).

*R<sub>f</sub>* = 0.2 (Petroleum ether /EtOAc = 5:1);

<sup>1</sup>H NMR (400 MHz, CDCl<sub>3</sub>) δ 7.69 (d, *J* = 8.1 Hz, 0.6H), 7.60 (d, *J* = 8.0 Hz, 0.4H), 7.16 (d, *J* = 8.0 Hz, 1H), 7.00 (s, 1H), 4.43 – 4.37 (m, 0.6H), 4.17 (td, *J* = 11.2, 4.5 Hz, 0.4H), 3.12 – 3.06 (m, 0.6H), 2.57 – 2.48 (m, 0.4H), 2.39 (s, 2H), 2.32 (s, 3H), 2.29 (s, 1H), 2.27 – 2.21 (m, 0.6H), 2.17 – 2.08 (m, 0.6H), 1.90 – 1.81 (m, 0.6H), 1.79 – 1.68 (m, 1.6H), 1.67 – 1.58 (m, 1H), 1.50 – 1.38 (m, 1.4H), 1.37 – 1.24 (m, 0.8H), 1.21 – 1.07 (m, 1H).

<sup>13</sup>C NMR (100 MHz, CDCl<sub>3</sub>) δ 141.8, 140.8, 137.3, 136.9, 135.8, 134.0, 131.7, 131.5, 128.0, 127.2, 125.6, 125.3, 68.8, 66.6, 58.6, 56.8, 37.5, 32.9, 25.4, 24.0, 23.1, 22.2, 21.6, 21.3, 21.2, 20.2, 19.0, 18.1.

HRMS (ESI): Calcd for C<sub>14</sub>H<sub>20</sub>ClOS<sup>+</sup> [M+H]<sup>+</sup> : 271.0918; found: 271.0918.

#### 1-(tert-butyl)-4-((2-chlorocyclohexyl)sulfinyl)benzene (**4e**)

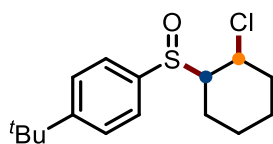

On 0.5 mmol scale. Electrolysis was conducted following the general procedure. The crude material was

purified by flash column chromatography (silica gel, petroleum ether /EtOAc = 10:1) to give **4e** as a colorless oil (115.1 mg, 77% yield, dr > 10:1).

*R<sub>f</sub>* = 0.2 (Petroleum ether /EtOAc = 10:1);

<sup>1</sup>H NMR (400 MHz, CDCl<sub>3</sub>) δ 7.41 (d, *J* = 8.5 Hz, 2H), 7.32 (d, *J* = 8.5 Hz, 2H), 3.31 (td, *J* = 9.9, 4.5 Hz, 1H), 3.05 (s, 1H), 2.76 – 2.67 (m, 1H), 2.16 – 2.06 (m, 2H), 1.73 – 1.65 (m, 2H), 1.36 – 1.33 (m, 1H), 1.31 (s, 9H), 1.28 – 1.22 (m, 2H).

<sup>13</sup>C NMR (100 MHz, CDCl<sub>3</sub>) δ 151.2, 133.9, 128.8, 126.0, 72.0, 56.7, 34.6, 33.8, 32.7, 31.3, 26.2, 24.3.

HRMS (ESI): Calcd for C<sub>16</sub>H<sub>24</sub>ClOS<sup>+</sup> [M+H]<sup>+</sup> : 299.1231; found: 299.1229.

#### 1-((2-chlorocyclohexyl)sulfinyl)-4-fluorobenzene (**4f**)

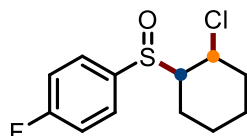

On 0.5 mmol scale. Electrolysis was conducted following the general procedure. The crude material was purified by flash column chromatography (silica gel, petroleum ether /EtOAc = 10:1) to give **4f** as a colorless oil (91.3 mg, 70% yield, dr > 10:1).

*R<sub>f</sub>* = 0.2 (Petroleum ether /EtOAc = 10:1);

<sup>1</sup>H NMR (400 MHz, CDCl<sub>3</sub>) δ 7.50 – 7.43 (m, 2H), 7.05 – 6.98 (m, 2H), 3.28 (td, *J* = 10.1, 4.4 Hz, 1H), 2.96 (s, 1H), 2.67 (td, *J* = 10.2, 3.7 Hz, 1H), 2.17 – 2.03 (m, 2H), 1.75 – 1.66 (m, 2H), 1.35 – 1.23 (m, 4H).

<sup>13</sup>C NMR (100 MHz, CDCl<sub>3</sub>) δ 164.1 (d, *J* = 246.7 Hz), 136.7 (d, *J* = 8.2 Hz), 127.1, 116.2 (d, *J* = 21.6 Hz), 71.7, 56.9, 33.8, 32.5, 26.2, 24.3.

<sup>19</sup>F NMR (376 MHz, CDCl<sub>3</sub>) δ -113.19 (s).

HRMS (ESI): Calcd for C<sub>12</sub>H<sub>15</sub>ClFOS<sup>+</sup> [M+H]<sup>+</sup> : 261.0511; found: 261.0511.

#### 1-chloro-4-((2-chlorocyclohexyl)sulfinyl)benzene (**4g**)

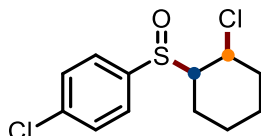

On 0.5 mmol scale. Electrolysis was conducted following the general procedure. The crude material was purified by flash column chromatography (silica gel, petroleum ether /EtOAc = 10:1) to give **4g** as a yellow solid (101.2 mg, 73% yield, dr > 10:1).

*M. p.* = 78-79 °C;

*R<sub>f</sub>* = 0.2 (Petroleum ether /EtOAc = 10:1);

<sup>1</sup>H NMR (400 MHz, CDCl<sub>3</sub>) δ 7.64 (d, *J* = 8.5 Hz, 2H), 7.53 (d, *J* = 8.5 Hz, 2H), 3.53 (td, *J* = 9.7, 4.1 Hz, 1H), 3.21 (td, *J* = 10.2, 3.6 Hz, 1H), 2.41 – 2.31 (m, 1H), 2.30 – 2.19 (m, 1H), 1.84 – 1.74 (m, 3H), 1.36 – 1.30 (m, 1H), 1.20 – 1.14 (m, 1H), 0.88 – 0.80 (m, 1H).

<sup>13</sup>C NMR (100 MHz, CDCl<sub>3</sub>) δ 137.8, 137.6, 129.3, 127.1, 68.2, 57.5, 36.5, 29.7, 24.6, 23.8, 21.5.

HRMS (ESI): Calcd for C<sub>12</sub>H<sub>15</sub>Cl<sub>2</sub>OS<sup>+</sup> [M+H]<sup>+</sup> : 277.0215; found: 277.0215.

#### 1-bromo-4-((2-chlorocyclohexyl)sulfinyl)benzene (**4h**)

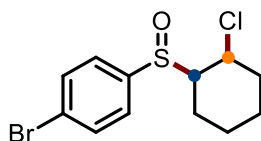

On 0.5 mmol scale. Electrolysis was conducted following the general procedure. The crude material was purified by flash column chromatography (silica gel, petroleum ether /EtOAc = 10:1) to give **4h** as a yellow solid (114.2 mg, 71% yield, dr > 10:1).

**M. p.** = 65-66 °C;

**R<sub>f</sub>** = 0.2 (Petroleum ether /EtOAc = 10:1);

**<sup>1</sup>H NMR (400 MHz, CDCl<sub>3</sub>)** δ 7.68 (d, *J* = 7.9 Hz, 2H), 7.57 (d, *J* = 7.9 Hz, 2H), 3.61 – 3.46 (m, 1H), 3.21 (t, *J* = 8.4 Hz, 1H), 2.35 (d, *J* = 12.0 Hz, 1H), 2.25 (d, *J* = 10.2 Hz, 1H), 1.85 – 1.73 (m, 3H), 1.36 – 1.30 (m, 1H), 1.21 – 1.15 (m, 1H), 0.86 – 0.80 (m, 1H).

**<sup>13</sup>C NMR (100 MHz, CDCl<sub>3</sub>)** δ 138.2, 132.2, 127.2, 126.1, 68.2, 57.5, 36.5, 24.7, 23.8, 21.5.

**HRMS (ESI):** Calcd for C<sub>12</sub>H<sub>15</sub>BrClOS<sup>+</sup> [M+H]<sup>+</sup> : 320.9710; found: 320.9711.

#### 1,2-dichloro-4-((2-chlorocyclohexyl)sulfinyl)benzene (**4i**)

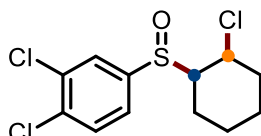

On 0.5 mmol scale. Electrolysis was conducted following the general procedure. The crude material was purified by flash column chromatography (silica gel, petroleum ether /EtOAc = 5:1) to give **4i** as a white solid (129.3 mg, 83% yield, dr = 1:1).

#### Diastereoisomer 1

**R<sub>f</sub>** = 0.4 (Petroleum ether /EtOAc = 5:1);

**<sup>1</sup>H NMR (400 MHz, CDCl<sub>3</sub>)** δ 7.66 (d, *J* = 1.8 Hz, 1H), 7.64 – 7.59 (m, 1H), 7.40 – 7.34 (m, 1H), 4.24 – 4.13 (m, 1H), 2.61 – 2.51 (m, 1H), 2.50 – 2.38 (m, 1H), 1.83 – 1.76 (m, 2H), 1.75 – 1.61 (m, 2H), 1.36 – 1.29 (m, 2H), 1.22 – 1.16 (m, 1H).

**<sup>13</sup>C NMR (100 MHz, CDCl<sub>3</sub>)** δ 141.9, 135.1, 134.1, 131.1, 126.3, 123.4, 70.7, 57.9, 37.4, 25.3, 24.0, 20.6.

**HRMS (ESI):** Calcd for C<sub>12</sub>H<sub>14</sub>Cl<sub>3</sub>OS<sup>+</sup> [M+H]<sup>+</sup> : 310.9825; found: 310.9826.

#### Diastereoisomer 2

**M. p.** = 105-106 °C;

**R<sub>f</sub>** = 0.3 (Petroleum ether /EtOAc = 5:1);

**<sup>1</sup>H NMR (400 MHz, CDCl<sub>3</sub>)** δ 7.79 (s, 1H), 7.63 (d, *J* = 8.3, 1.7 Hz, 1H), 7.52 (d, *J* = 8.3 Hz, 1H), 3.57 – 3.48 (m, 1H), 3.28 – 3.19 (m, 1H), 2.38 (d, *J* = 12.4 Hz, 1H), 2.32 – 2.23 (m, 1H), 1.86 – 1.75 (m, 3H), 1.39 – 1.29 (m, 1H), 1.27 – 1.16 (m, 1H), 0.86 – 0.76 (m, 1H).

**<sup>13</sup>C NMR (100 MHz, CDCl<sub>3</sub>)** δ 139.3, 136.1, 134.1, 131.0, 127.5, 124.8, 68.4, 57.4, 36.7, 24.7, 23.9, 21.7.

**HRMS (ESI):** Calcd for C<sub>12</sub>H<sub>14</sub>Cl<sub>3</sub>OS<sup>+</sup> [M+H]<sup>+</sup> : 310.9825; found: 310.9827.

#### 4-((2-chlorocyclohexyl)sulfinyl)benzonitrile (**4j**)

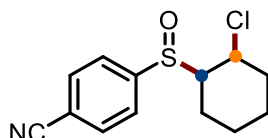

On 0.5 mmol scale. Electrolysis was conducted following the general procedure. The crude material was purified by flash column chromatography (silica gel, petroleum ether /EtOAc = 5:1) to give **4j** as a yellow solid (53.5 mg, 45% yield, dr = 2.5:1).

#### Diastereoisomer 1

**M. p.** = 106-107 °C;

**R<sub>f</sub>** = 0.1 (Petroleum ether /EtOAc = 5:1);

**<sup>1</sup>H NMR (400 MHz, CDCl<sub>3</sub>)** δ 7.84 (d, *J* = 8.3 Hz, 2H), 7.70 (d, *J* = 8.3 Hz, 2H), 4.20 (td, *J* = 11.3, 4.5 Hz, 1H), 2.60 (td, *J* = 11.7, 3.9 Hz, 1H), 2.50 – 2.41 (m, 1H), 1.81 – 1.76 (m, 2H), 1.73 (s, 1H), 1.71 – 1.64 (m, 1H), 1.39 – 1.28 (m, 1H), 1.26 – 1.14 (m, 2H).

**<sup>13</sup>C NMR (100 MHz, CDCl<sub>3</sub>)** δ 147.9, 132.7, 125.2, 117.8, 114.5, 70.9, 57.9, 37.4, 25.3, 24.0, 20.8.

**HRMS (ESI):** Calcd for C<sub>13</sub>H<sub>15</sub>ClNOS<sup>+</sup> [M+H]<sup>+</sup> : 268.0557; found: 268.0558.

#### Diastereoisomer 2

**R<sub>f</sub>** = 0.1 (Petroleum ether /EtOAc = 3:1);

**<sup>1</sup>H NMR (400 MHz, CDCl<sub>3</sub>)** δ 7.84 (s, 4H), 3.50 (td, *J* = 10.0, 4.2 Hz, 1H), 3.27 (td, *J* = 10.6, 3.6 Hz, 1H), 2.45 – 2.35 (m, 1H), 2.33 – 2.23 (m, 1H), 1.87 – 1.74 (m, 3H), 1.39 – 1.29 (m, 1H), 1.22 – 1.10 (m, 1H), 0.83 – 0.69 (m, 1H).

**<sup>13</sup>C NMR (100 MHz, CDCl<sub>3</sub>)** δ 145.2, 132.5, 126.4, 117.7, 115.3, 68.6, 57.2, 36.8, 24.8, 23.9, 22.1.

**HRMS (ESI):** Calcd for C<sub>13</sub>H<sub>15</sub>ClNOS<sup>+</sup> [M+H]<sup>+</sup> : 268.0557; found: 268.0557.

#### 1-((2-chlorocyclohexyl)sulfinyl)-4-(trifluoromethyl)benzene (4k)

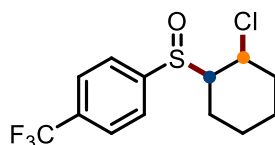

On 0.5 mmol scale. Electrolysis was conducted following the general procedure. The crude material was purified by flash column chromatography (silica gel, petroleum ether /EtOAc = 10:1) to give **4k** as a white solid (63.7 mg, 41% yield, dr > 10:1).

**M. p.** = 103-104 °C;

**R<sub>f</sub>** = 0.3 (Petroleum ether /EtOAc = 10:1);

**<sup>1</sup>H NMR (400 MHz, CDCl<sub>3</sub>)** δ 7.54 (s, 4H), 3.46 – 3.37 (m, 1H), 3.01 – 2.91 (m, 1H), 2.19 – 2.10 (m, 2H), 1.80 – 1.69 (m, 2H), 1.43 – 1.34 (m, 2H), 1.33 – 1.27 (m, 2H).

**<sup>13</sup>C NMR (100 MHz, CDCl<sub>3</sub>)** δ 131.6, 125.7, 72.7, 56.0, 34.0, 32.8, 26.0, 24.2.

**<sup>19</sup>F NMR (376 MHz, CDCl<sub>3</sub>)** δ -62.58 (s).

**HRMS (ESI):** Calcd for C<sub>13</sub>H<sub>15</sub>ClF<sub>3</sub>OS<sup>+</sup> [M+H]<sup>+</sup> : 311.0479; found: 311.0480.

#### 1-((2-chlorocyclohexyl)sulfinyl)-4-methoxybenzene (4l)

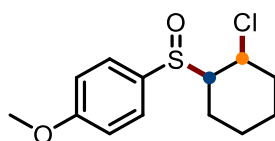

On 0.5 mmol scale. Electrolysis was conducted following the general procedure. The crude material was purified by flash column chromatography (silica gel, petroleum ether /EtOAc = 5:1) to give **4l** as a yellow oil (94.1 mg, 69% yield, dr = 1:1).

**R<sub>f</sub>** = 0.2 (Petroleum ether /EtOAc = 5:1);

**<sup>1</sup>H NMR (400 MHz, CDCl<sub>3</sub>)** δ 7.62 (d, *J* = 8.8 Hz, 1H), 7.47 (d, *J* = 8.8 Hz, 1H), 7.04 (d, *J* = 8.4 Hz, 2H), 4.18 (td, *J* = 10.9, 4.4 Hz, 0.5H), 3.87 (d, *J* = 5.0 Hz, 3H), 3.62 (td, *J* = 9.2, 4.0 Hz, 0.5H), 3.17 (td, *J* = 9.6, 3.7 Hz, 0.5H), 2.49 (td, *J* = 11.2, 4.1 Hz, 0.5H), 2.44 – 2.37 (m, 0.5H), 2.36 – 2.29 (m, 0.5H), 2.28 – 2.20 (m, 0.5H), 1.86 – 1.70 (m, 3.5H), 1.70 – 1.64 (m, 0.5H), 1.42 – 1.29 (m, 2H), 1.23 – 1.13 (m, 1H), 0.92 – 0.81 (m, 1H).

$^{13}\text{C}$  NMR (100 MHz,  $\text{CDCl}_3$ )  $\delta$  162.3, 161.7, 132.1, 129.9, 127.5, 125.9, 114.7, 114.5, 70.4, 68.1, 58.2, 57.82, 55.5, 37.3, 36.0, 29.7, 25.2, 24.3, 24.0, 23.7, 21.3, 20.3.

HRMS (ESI): Calcd for  $\text{C}_{13}\text{H}_{18}\text{ClO}_2\text{S}^+$   $[\text{M}+\text{H}]^+$  : 273.0711; found: 273.0709.

#### 2-((2-chlorocyclohexyl)sulfinyl)naphthalene (4m)

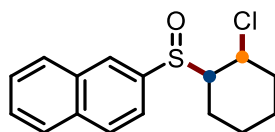

On 0.5 mmol scale. Electrolysis was conducted following the general procedure. The crude material was purified by flash column chromatography (silica gel, petroleum ether /EtOAc = 10:1) to give **4m** as a white solid (57.1 mg, 39% yield, dr = 1:1).

M. p. = 104-105 °C;

Rf = 0.2 (Petroleum ether /EtOAc = 10:1);

$^1\text{H}$  NMR (400 MHz,  $\text{CDCl}_3$ )  $\delta$  8.33 (d,  $J$  = 8.2 Hz, 0.5H), 8.16 (s, 0.5H), 8.03 – 7.90 (m, 3H), 7.87 (d,  $J$  = 8.6 Hz, 0.5H), 7.73 – 7.64 (m, 1H), 7.62 – 7.59 (m, 1H), 7.51 – 7.47 (m, 0.5H), 4.33 – 4.22 (m, 1H), 3.21 (td,  $J$  = 11.5, 4.1 Hz, 0.5H), 2.68 (td,  $J$  = 11.2, 4.2 Hz, 0.5H), 2.50 – 2.42 (m, 1H), 1.79 – 1.72 (m, 3H), 1.38 – 1.26 (m, 3H), 1.19 – 1.11 (m, 1H).

$^{13}\text{C}$  NMR (100 MHz,  $\text{CDCl}_3$ )  $\delta$  138.7, 136.7, 135.5, 134.2, 132.9, 130.6, 129.2, 128.6, 128.4, 128.3, 128.2, 128.1, 127.7, 127.4, 125.1, 124.0, 122.2, 120.0, 70.1, 66.3, 58.2, 58.0, 37.5, 37.4, 25.4, 24.1, 24.0, 21.6, 20.6.

HRMS (ESI): Calcd for  $\text{C}_{16}\text{H}_{18}\text{ClOS}^+$   $[\text{M}+\text{H}]^+$  : 293.0761; found: 293.0760.

#### ((2-chlorocyclohexyl)seleninyl)benzene (4n)

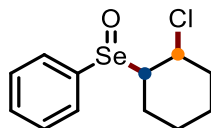

On 0.5 mmol scale. Electrolysis was conducted following the general procedure. The crude material was purified by flash column chromatography (silica gel, petroleum ether /EtOAc = 5:1) to give **4n** as a yellow oil (30.4 mg, 21% yield, dr > 20:1).

Rf = 0.3 (Petroleum ether /EtOAc = 5:1);

$^1\text{H}$  NMR (400 MHz,  $\text{CDCl}_3$ )  $\delta$  7.62 – 7.57 (m, 2H), 7.34 – 7.26 (m, 3H), 3.33 (td,  $J$  = 10.1, 4.3 Hz, 1H), 2.95 – 2.85 (m, 2H), 2.23 – 2.10 (m, 2H), 1.77 – 1.68 (m, 1H), 1.63 (d,  $J$  = 9.6 Hz, 1H), 1.48 – 1.38 (m, 1H), 1.38 – 1.30 (m, 1H), 1.29 – 1.21 (m, 3H).

$^{13}\text{C}$  NMR (100 MHz,  $\text{CDCl}_3$ )  $\delta$  136.1, 129.0, 128.2, 126.6, 77.4, 77.1, 76.7, 72.3, 53.6, 33.9, 33.4, 26.9, 24.5.

HRMS (ESI): Calcd for  $\text{C}_{12}\text{H}_{16}\text{ClOSe}^+$   $[\text{M}+\text{H}]^+$  : 291.0049; found: 291.0234.

#### 1-((2-chlorocyclopentyl)sulfinyl)-4-methylbenzene (4o)

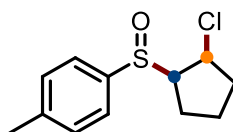

On 0.5 mmol scale. Electrolysis was conducted following the general procedure. The crude material was purified by flash column chromatography (silica gel, petroleum ether /EtOAc = 5:1) to give **4o** as a yellow oil (88.6 mg, 73% yield, dr = 1.5:1).

*Rf* = 0.3 (Petroleum ether /EtOAc = 5:1);

<sup>1</sup>H NMR (400 MHz, CDCl<sub>3</sub>) δ 7.54 (d, *J* = 8.1 Hz, 1H), 7.46 (d, *J* = 8.1 Hz, 1H), 7.36 – 7.30 (m, 2H), 4.66 – 4.61 (m, 0.4H), 4.55 – 4.48 (m, 0.6H), 3.39 – 3.31 (m, 0.4H), 3.22 – 3.12 (m, 0.6H), 2.42 (d, *J* = 5.1 Hz, 3H), 2.23 – 2.13 (m, 1.4H), 2.11 – 2.04 (m, 0.6H), 2.01 – 1.91 (m, 1.6H), 1.90 – 1.81 (m, 1.4H), 1.80 – 1.73 (m, 0.6H), 1.63 – 1.52 (m, 0.6H).

<sup>13</sup>C NMR (100 MHz, CDCl<sub>3</sub>) δ 141.9, 141.4, 139.0, 138.7, 130.0, 129.9, 124.6, 124.0, 72.9, 72.5, 59.6, 57.9, 37.6, 37.3, 26.6, 23.9, 22.8, 21.5, 21.4, 20.6.

HRMS (ESI): Calcd for C<sub>12</sub>H<sub>16</sub>ClOS<sup>+</sup> [M+H]<sup>+</sup> : 243.0605; found: 243.0605.

#### 1-chloro-2-(p-tolylsulfinyl)cycloheptane (4p)

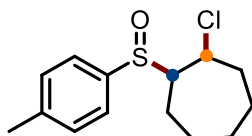

On 0.5 mmol scale. Electrolysis was conducted following the general procedure. The crude material was purified by flash column chromatography (silica gel, petroleum ether /EtOAc = 10:1) to give **4p** as a colorless oil (86.7 mg, 64 % yield, dr = 1:1).

*Rf* = 0.3 (Petroleum ether /EtOAc = 10:1);

<sup>1</sup>H NMR (400 MHz, CDCl<sub>3</sub>) δ 7.55 (d, *J* = 8.1 Hz, 1H), 7.47 (d, *J* = 8.1 Hz, 1H), 7.35 – 7.30 (m, 2H), 4.65 – 4.58 (m, 0.5H), 4.03 – 3.97 (m, 0.5H), 3.27 – 3.20 (m, 0.5H), 2.78 (td, *J* = 9.4, 3.0 Hz, 0.5H), 2.42 (s, 3H), 2.36 – 2.27 (m, 0.5H), 2.22 – 2.14 (m, 1H), 2.14 – 2.01 (m, 1H), 1.76 – 1.62 (m, 4H), 1.59 – 1.34 (m, 3H), 1.22 – 1.06 (m, 1H).

<sup>13</sup>C NMR (100 MHz, CDCl<sub>3</sub>) δ 142.0, 141.1, 139.1, 136.6, 129.9, 129.7, 125.4, 124.3, 74.8, 71.9, 61.4, 59.1, 37.4, 37.0, 28.8, 28.5, 27.1, 26.8, 23.0, 22.8, 22.5, 21.9, 21.5, 21.4.

HRMS (ESI): Calcd for C<sub>14</sub>H<sub>20</sub>ClOS<sup>+</sup> [M+H]<sup>+</sup> : 271.0918; found: 271.0915.

#### 1-chloro-2-(p-tolylsulfinyl)cyclooctane (4q)

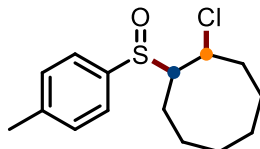

On 0.5 mmol scale. Electrolysis was conducted following the general procedure. The crude material was purified by flash column chromatography (silica gel, petroleum ether /EtOAc = 10:1) to give **4q** as a yellow oil (76.9 mg, 54% yield, dr = 1.5:1).

*Rf* = 0.2 (Petroleum ether /EtOAc = 10:1);

<sup>1</sup>H NMR (400 MHz, CDCl<sub>3</sub>) δ 7.55 (d, *J* = 8.1 Hz, 1.2H), 7.45 (d, *J* = 8.1 Hz, 0.8H), 7.35 – 7.29 (m, 2H), 4.60 – 4.52 (m, 0.4H), 3.65 – 3.58 (m, 0.6H), 3.53 – 3.44 (m, 0.6H), 2.86 – 2.78 (m, 0.4H), 2.52 – 2.45 (m, 0.6H), 2.41 (s, 3H), 2.29 – 2.20 (m, 0.4H), 2.18 – 2.09 (m, 0.6H), 2.08 – 2.02 (m, 0.6H), 2.00 – 1.89 (m, 2H), 1.87 – 1.79 (m, 0.6H), 1.73 – 1.65 (m, 1.2H), 1.62 – 1.47 (m, 3.4H), 1.43 – 1.34 (m, 1.6H), 1.31 – 1.22 (m, 1H), 0.89 – 0.75 (m, 0.8H), 0.61 – 0.50 (m, 0.4H).

<sup>13</sup>C NMR (100 MHz, CDCl<sub>3</sub>) δ 142.1, 140.8, 139.2, 135.3, 129.8, 129.6, 125.8, 124.0, 72.4, 68.8, 61.4, 60.9, 32.4, 31.8, 29.5, 29.4, 26.3, 26.0, 25.3, 24.5, 22.6, 22.0, 21.5, 21.4, 21.1, 20.6.

HRMS (ESI): Calcd for C<sub>15</sub>H<sub>22</sub>ClOS<sup>+</sup> [M+H]<sup>+</sup> : 285.1074; found: 285.1072.

#### 2-chloro-3-(p-tolylsulfinyl)bicyclo[2.2.1]heptane (4r)

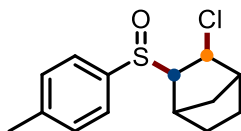

On 0.5 mmol scale. Electrolysis was conducted following the general procedure. The crude material was purified by flash column chromatography (silica gel, petroleum ether /EtOAc = 5:1) to give **4r** as a white solid (68.5 mg, 51 % yield, dr > 10:1).

**M. p.** = 99-100 °C;

**R<sub>f</sub>** = 0.2 (Petroleum ether /EtOAc = 5:1);

**<sup>1</sup>H NMR (400 MHz, CDCl<sub>3</sub>)** δ 7.88 (d, *J* = 8.1 Hz, 2H), 7.32 (d, *J* = 8.1 Hz, 2H), 4.53 (d, *J* = 4.2 Hz, 1H), 2.85 (d, *J* = 4.1 Hz, 1H), 2.72 – 2.67 (m, 1H), 2.61 – 2.53 (m, 1H), 2.43 (s, 3H), 2.25 – 2.19 (m, 1H), 2.11 (d, *J* = 10.9 Hz, 1H), 1.84 – 1.75 (m, 2H), 1.66 (d, *J* = 11.0 Hz, 2H), 1.60 (s, 1H), 1.36 – 1.32 (m, 1H).

**<sup>13</sup>C NMR (100 MHz, CDCl<sub>3</sub>)** δ 142.4, 137.4, 129.0, 128.7, 70.2, 51.7, 45.8, 36.9, 23.6, 21.5, 21.1.

**HRMS (ESI):** Calcd for C<sub>14</sub>H<sub>18</sub>ClOS<sup>+</sup> [M+H]<sup>+</sup> : 269.0761; found: 269.0761.

**6-chloro-7-(p-tolylsulfinyl)decahydro-1,4-methanonaphthalene (4s)**

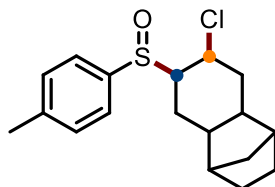

On 0.5 mmol scale. Electrolysis was conducted following the general procedure. The crude material was purified by flash column chromatography (silica gel, petroleum ether /EtOAc = 10:1) to give **4s** as a white solid (82.3 mg, 51% yield, dr = 1.5:1).

**M. p.** = 88-89 °C;

**R<sub>f</sub>** = 0.4 (Petroleum ether /EtOAc = 10:1);

**<sup>1</sup>H NMR (400 MHz, CDCl<sub>3</sub>)** δ 7.60 (d, *J* = 8.1 Hz, 0.6H), 7.52 (d, *J* = 8.1 Hz, 1.4H), 7.32 (d, *J* = 7.8 Hz, 2H), 4.64 (s, 0.4H), 4.40 – 4.29 (m, 0.6H), 3.21 – 3.11 (m, 0.6H), 2.58 – 2.49 (m, 0.4H), 2.43 (d, *J* = 8.7 Hz, 3H), 2.31 – 2.21 (m, 0.4H), 2.13 – 1.97 (m, 2.6H), 1.90 (d, *J* = 15.3 Hz, 2H), 1.79 – 1.71 (m, 1H), 1.67 (d, *J* = 9.8 Hz, 1H), 1.58 – 1.48 (m, 3.6H), 1.27 – 1.18 (m, 2.4H), 1.09 – 1.00 (m, 1H).

**<sup>13</sup>C NMR (100 MHz, CDCl<sub>3</sub>)** δ 141.6, 138.9, 129.8, 129.2, 127.6, 124.4, 68.1, 59.7, 49.0, 45.3, 42.0, 42.0, 41.9, 41.6, 37.6, 37.5, 37.4, 35.7, 34.2, 33.0, 32.6, 32.0, 30.6, 29.2, 29.1, 28.6, 27.7, 21.6, 21.5.

**HRMS (ESI):** Calcd for C<sub>18</sub>H<sub>24</sub>ClOS<sup>+</sup> [M+H]<sup>+</sup> : 323.1231; found: 323.1228.

**2-chloro-3-(p-tolylsulfinyl)-1,2,3,4-tetrahydronaphthalene (4t)**

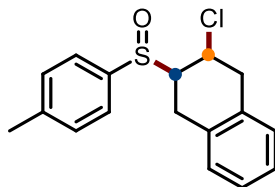

On 0.5 mmol scale. Electrolysis was conducted following the general procedure. The crude material was purified by flash column chromatography (silica gel, petroleum ether /EtOAc = 10:1) to give **4t** as a white solid (85.4 mg, 56% yield, dr = 1.1:1).

**Diastereoisomer 1**

**M. p.** = 93-94 °C;



*R<sub>f</sub>* = 0.4 (Petroleum ether /EtOAc = 10:1);

<sup>1</sup>H NMR (400 MHz, CDCl<sub>3</sub>) δ 7.54 (d, *J* = 8.1 Hz, 2H), 7.40 (d, *J* = 8.0 Hz, 2H), 7.17 – 7.11 (m, 2H), 7.10 – 7.06 (m, 1H), 7.05 – 7.01 (m, 1H), 4.49 (td, *J* = 10.0, 5.3 Hz, 1H), 3.55 – 3.46 (m, 1H), 3.41 – 3.31 (m, 1H), 3.30 – 3.21 (m, 1H), 3.06 (td, *J* = 10.1, 6.0 Hz, 1H), 2.53 – 2.48 (m, 1H), 2.47 (s, 3H).

<sup>13</sup>C NMR (100 MHz, CDCl<sub>3</sub>) δ 141.5, 138.0, 132.8, 132.6, 130.1, 129.0, 128.2, 126.9, 126.5, 124.3, 66.8, 55.1, 39.8, 23.6, 21.5.

HRMS (ESI): Calcd for C<sub>17</sub>H<sub>18</sub>ClOS<sup>+</sup> [M+H]<sup>+</sup> : 305.0761; found: 305.0760.

#### Diastereoisomer 2

*R<sub>f</sub>* = 0.3 (Petroleum ether /EtOAc = 10:1);

<sup>1</sup>H NMR (400 MHz, CDCl<sub>3</sub>) δ 7.61 (d, *J* = 7.4 Hz, 2H), 7.36 (d, *J* = 7.1 Hz, 2H), 7.20 – 7.13 (m, 2H), 7.12 – 7.08 (m, 1H), 7.07 – 7.02 (m, 1H), 4.61 (d, *J* = 4.4 Hz, 1H), 3.60 (d, *J* = 17.2 Hz, 1H), 3.51 (d, *J* = 5.1 Hz, 1H), 3.36 (d, *J* = 17.4 Hz, 1H), 3.29 – 3.19 (m, 1H), 2.54 – 2.46 (m, 1H), 2.43 (s, 3H).

<sup>13</sup>C NMR (100 MHz, CDCl<sub>3</sub>) δ 142.7, 132.3, 131.9, 130.1, 129.0, 128.6, 126.9, 126.8, 125.7, 54.0, 36.9, 25.3, 21.6.

HRMS (ESI): Calcd for C<sub>17</sub>H<sub>18</sub>ClOS<sup>+</sup> [M+H]<sup>+</sup> : 305.0761; found: 305.0759.

#### 1-((6-chlorocyclohex-3-en-1-yl)sulfinyl)-4-methylbenzene (4u)

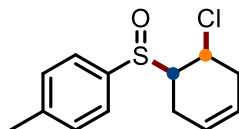

On 0.5 mmol scale. Electrolysis was conducted following the general procedure. The crude material was purified by flash column chromatography (silica gel, petroleum ether /EtOAc = 10:1) to give **4u** as a yellow solid (52.2 mg, 41% yield, dr > 10:1).

M. p. = 62-63 °C;

*R<sub>f</sub>* = 0.2 (Petroleum ether /EtOAc = 10:1);

<sup>1</sup>H NMR (400 MHz, CDCl<sub>3</sub>) δ 7.62 (d, *J* = 8.1 Hz, 2H), 7.35 (d, *J* = 8.0 Hz, 2H), 5.66 (s, 2H), 4.46 – 4.39 (m, 1H), 3.38 – 3.31 (m, 1H), 2.99 – 2.89 (m, 1H), 2.65 – 2.52 (m, 2H), 2.43 (s, 3H), 1.79 – 1.72 (m, 1H).

<sup>13</sup>C NMR (100 MHz, CDCl<sub>3</sub>) δ 142.6, 137.5, 130.0, 125.8, 123.7, 123.5, 65.0, 53.6, 32.8, 21.5, 21.2.

HRMS (ESI): Calcd for C<sub>13</sub>H<sub>16</sub>ClOS<sup>+</sup> [M+H]<sup>+</sup> : 255.0605; found: 255.0605.

#### 1-((2-chloro-2-phenylethyl)sulfinyl)-4-methylbenzene (4v)

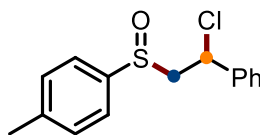

On 0.5 mmol scale. Electrolysis was conducted following the general procedure. The crude material was purified by flash column chromatography (silica gel, petroleum ether /EtOAc = 10:1) to give **4v** as a colorless oil (87.8 mg, 63% yield).

*R<sub>f</sub>* = 0.5 (Petroleum ether /EtOAc = 5:1);

<sup>1</sup>H NMR (400 MHz, CDCl<sub>3</sub>) δ 7.37 – 7.31 (m, 6H), 7.31 – 7.27 (m, 1H), 7.13 (d, *J* = 8.0 Hz, 2H), 4.71 – 4.64 (m, 1H), 3.30 – 3.22 (m, 1H), 3.07 – 2.98 (m, 1H), 2.34 (s, 3H).

<sup>13</sup>C NMR (100 MHz, CDCl<sub>3</sub>) δ 142.2, 137.2, 131.1, 130.0, 128.6, 127.9, 125.9, 71.5, 44.9, 21.1.

HRMS (ESI): Calcd for C<sub>15</sub>H<sub>16</sub>ClOS<sup>+</sup> [M+H]<sup>+</sup> : 279.0605; found: 279.0613.

#### 2-chloro-3-((p-tolylsulfinyl)tetrahydro-2H-pyran (4w)

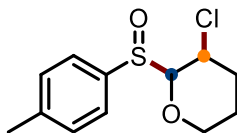

On 0.5 mmol scale. Electrolysis was conducted following the general procedure. The crude material was purified by flash column chromatography (silica gel, petroleum ether /EtOAc = 5:1) to give **4w** as a white solid (41.4 mg, 32% yield).

**M. p.** = 82-83 °C;

**R<sub>f</sub>** = 0.5 (Petroleum ether /EtOAc = 4:1);

**<sup>1</sup>H NMR (400 MHz, CDCl<sub>3</sub>)** δ 7.74 (d, *J* = 8.2 Hz, 2H), 7.61 (s, 1H), 7.31 (d, *J* = 8.0 Hz, 2H), 4.04 – 4.00 (m, 2H), 2.43 (s, 3H), 2.17 (t, *J* = 6.1 Hz, 2H), 1.87 (m, 2H), 1.57 (s, 1H), 1.29 (m, 1H).

**<sup>13</sup>C NMR (100 MHz, CDCl<sub>3</sub>)** δ 143.7, 137.7, 129.7, 127.5, 115.4, 66.5, 29.7, 21.6, 20.8, 18.9.

**HRMS (ESI):** Calcd for C<sub>12</sub>H<sub>16</sub>ClO<sub>2</sub>S<sup>+</sup> [M+H]<sup>+</sup> : 259.0554; found: 259.0555.

**1,2-di-*p*-tolylidysulfane (6)**

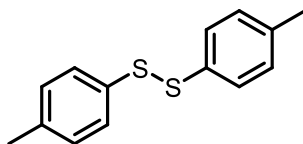

On 0.5 mmol scale. Electrolysis was conducted following the mechanistic studies procedure. The crude material was purified by flash column chromatography (silica gel, petroleum ether) to give **6** as a white solid (73.9 mg, 60% yield).

**R<sub>f</sub>** = 0.8 (Petroleum ether)

**<sup>1</sup>H NMR (400 MHz, CDCl<sub>3</sub>)** δ 7.37 (d, *J* = 6.5 Hz, 2H), 7.09 (d, *J* = 7.0 Hz, 2H), 2.30 (s, 3H).

**<sup>13</sup>C NMR (100 MHz, CDCl<sub>3</sub>)** δ 137.5, 133.9, 129.8, 128.6, 21.11.

The analytic data is consistent with those reported in the literature. <sup>1</sup>

## 5. Spectra of prepared compounds

$^1\text{H}$  NMR spectrum of compound **3a**

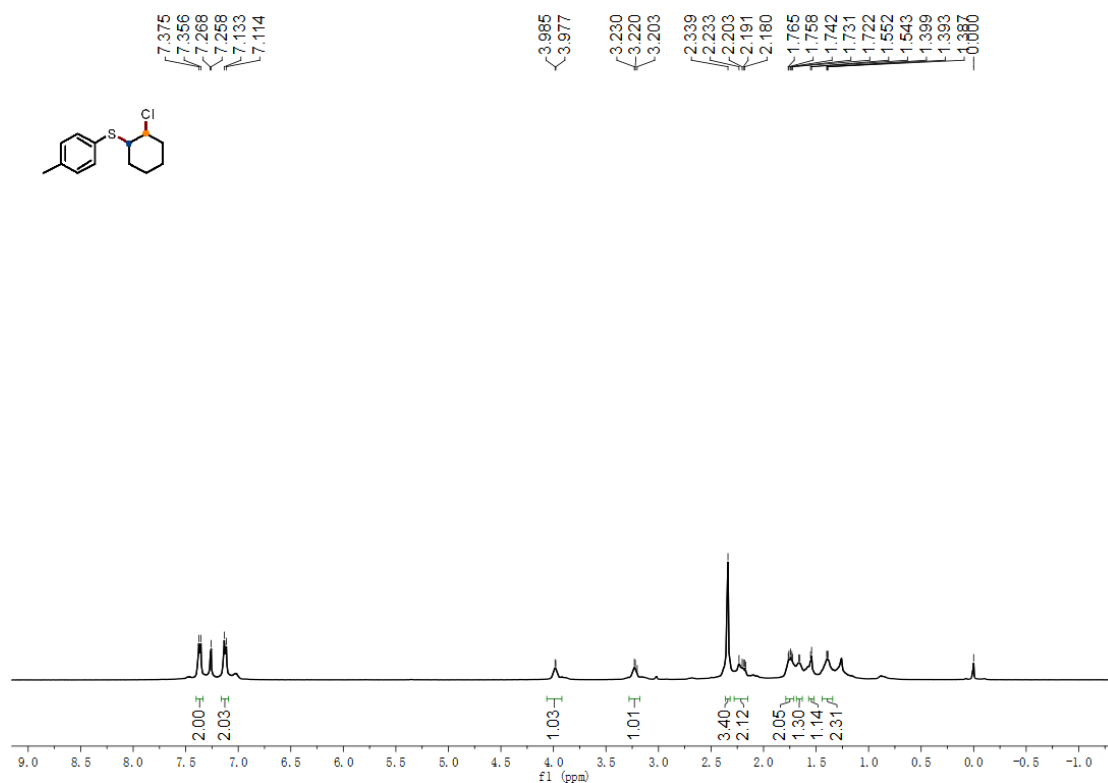

$^{13}\text{C}$  NMR spectrum of compound **3a**

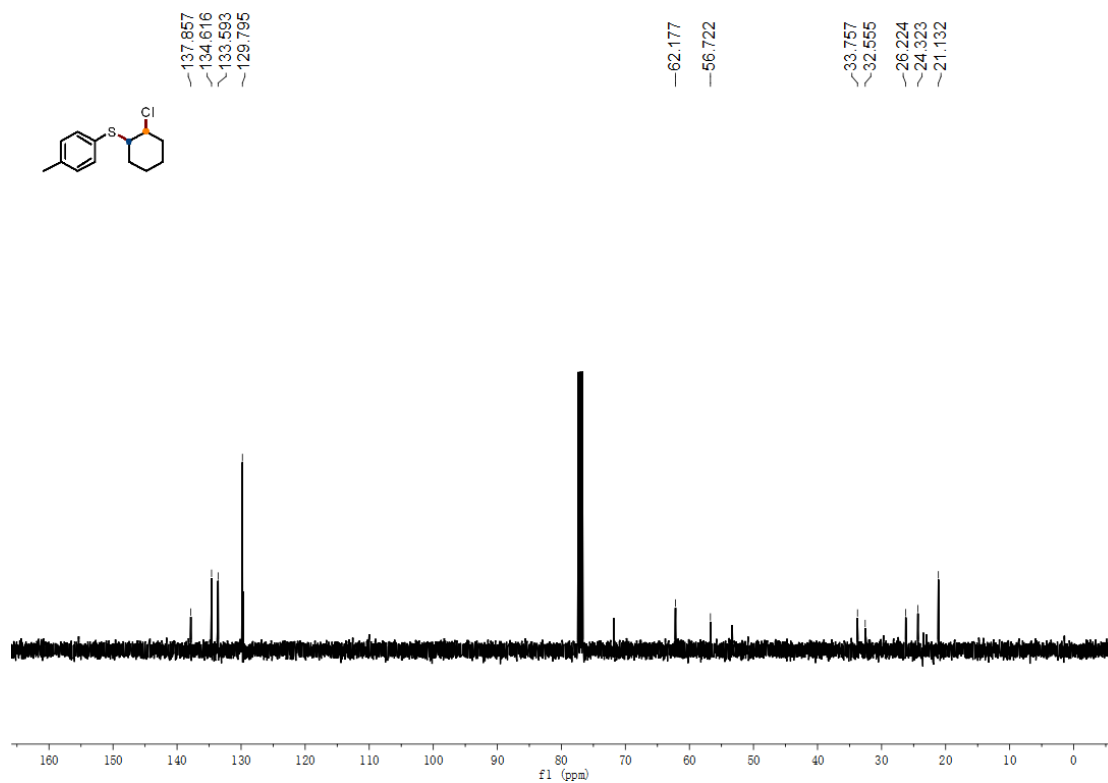

<sup>1</sup>H NMR spectrum of compound **3b**

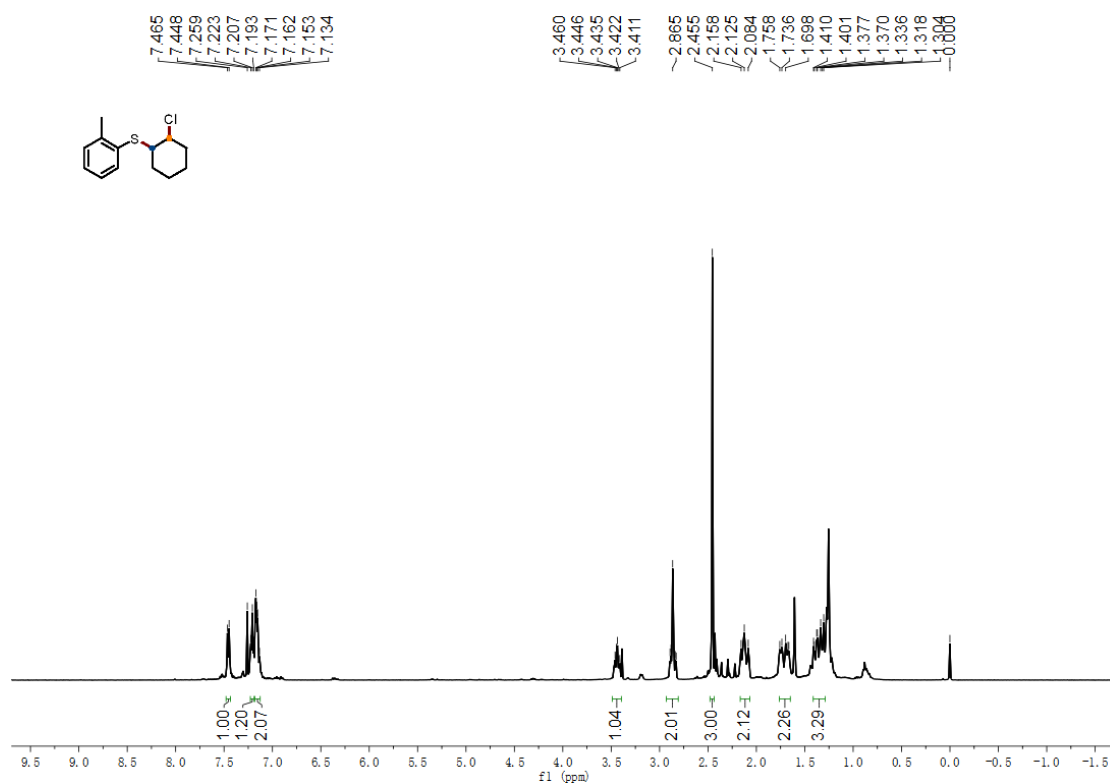

<sup>13</sup>C NMR spectrum of compound **3b**

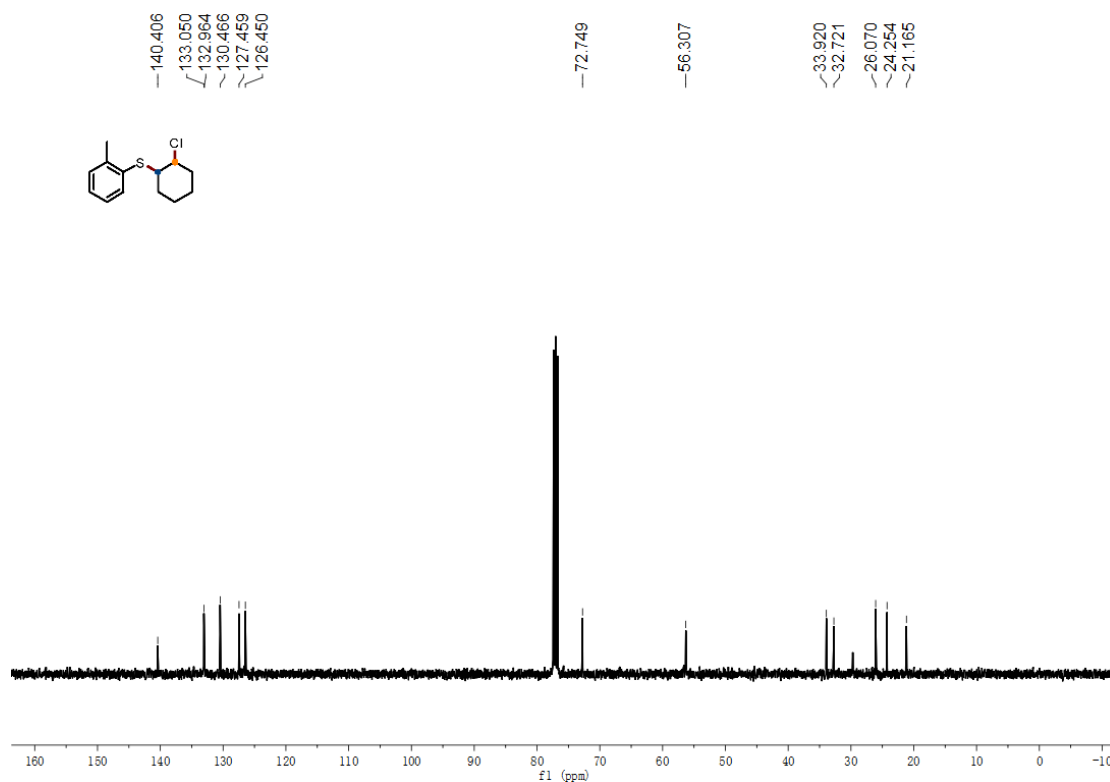

<sup>1</sup>H NMR spectrum of compound 3c

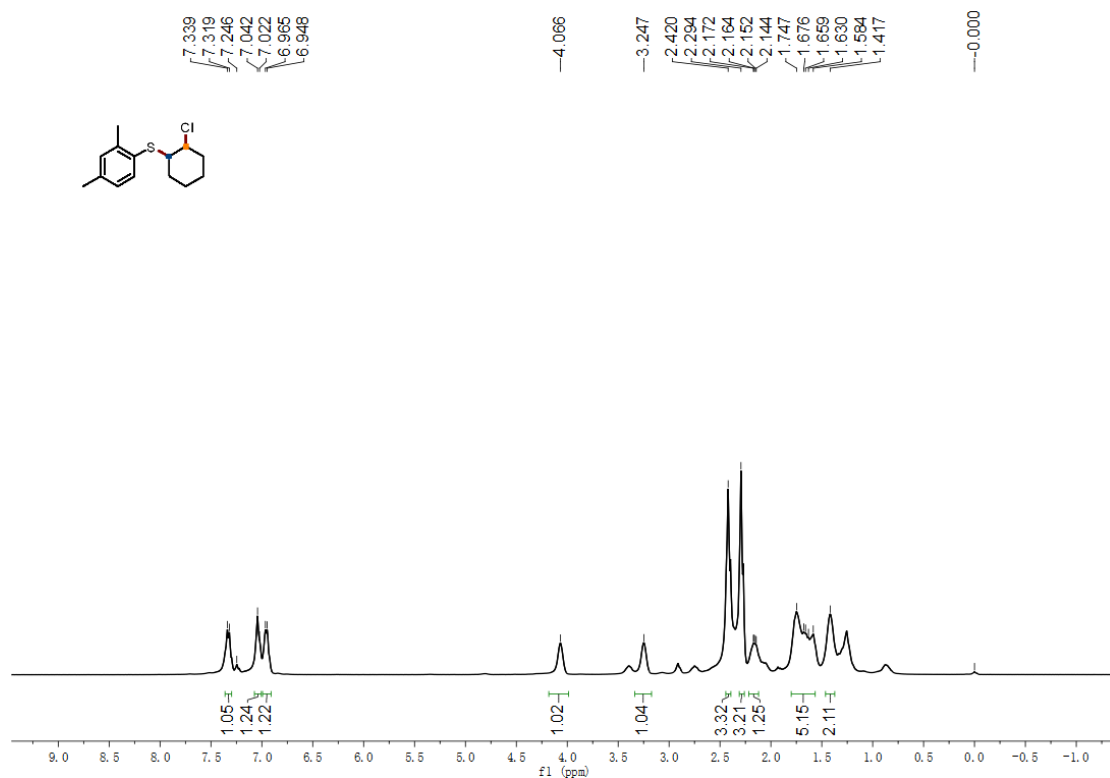

<sup>13</sup>C NMR spectrum of compound 3c

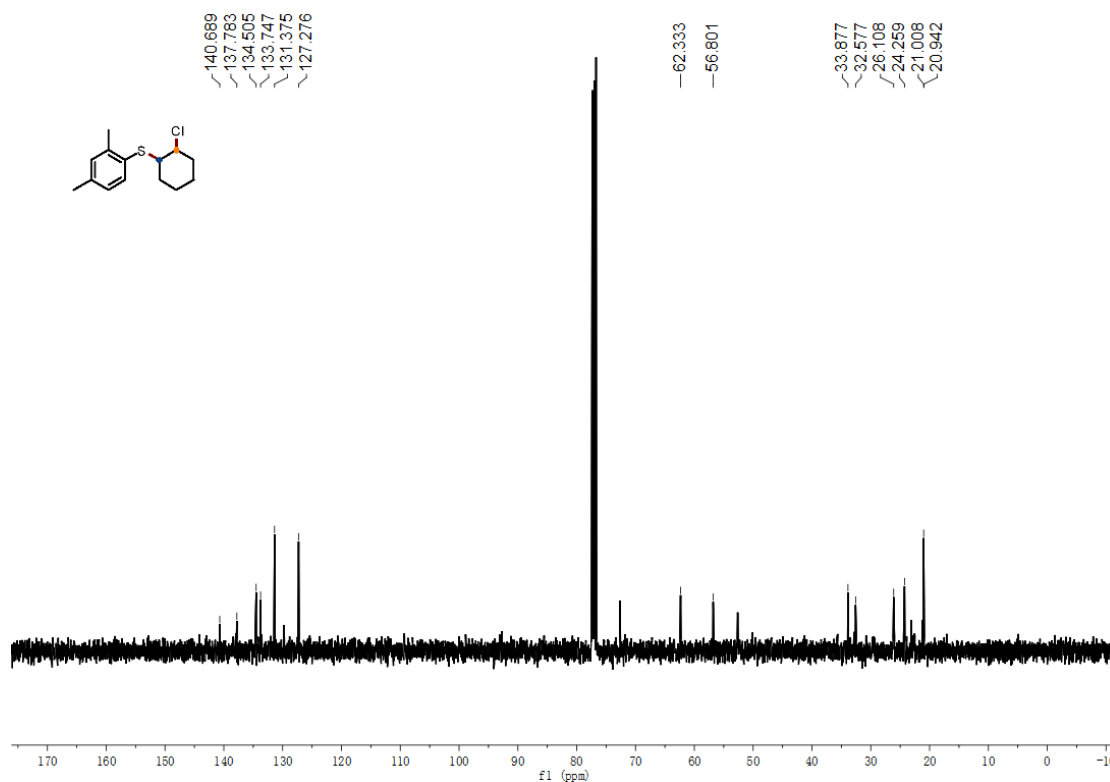

<sup>1</sup>H NMR spectrum of compound **3d**

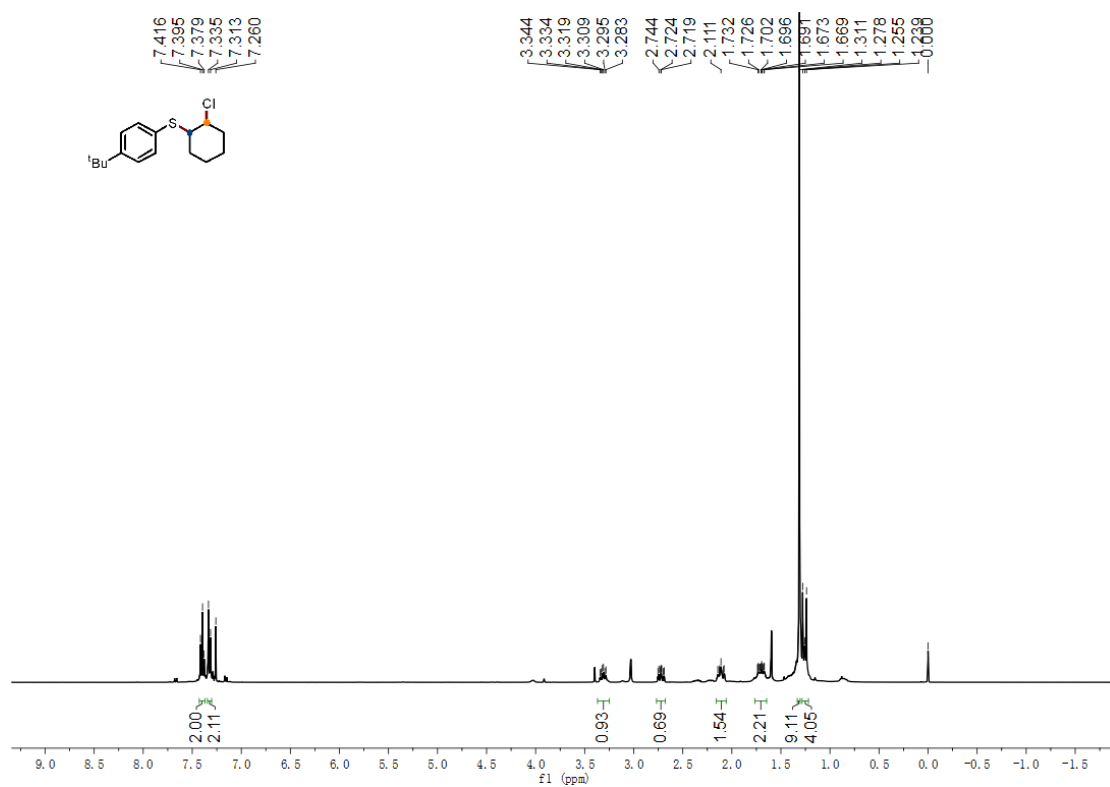

<sup>13</sup>C NMR spectrum of compound **3d**

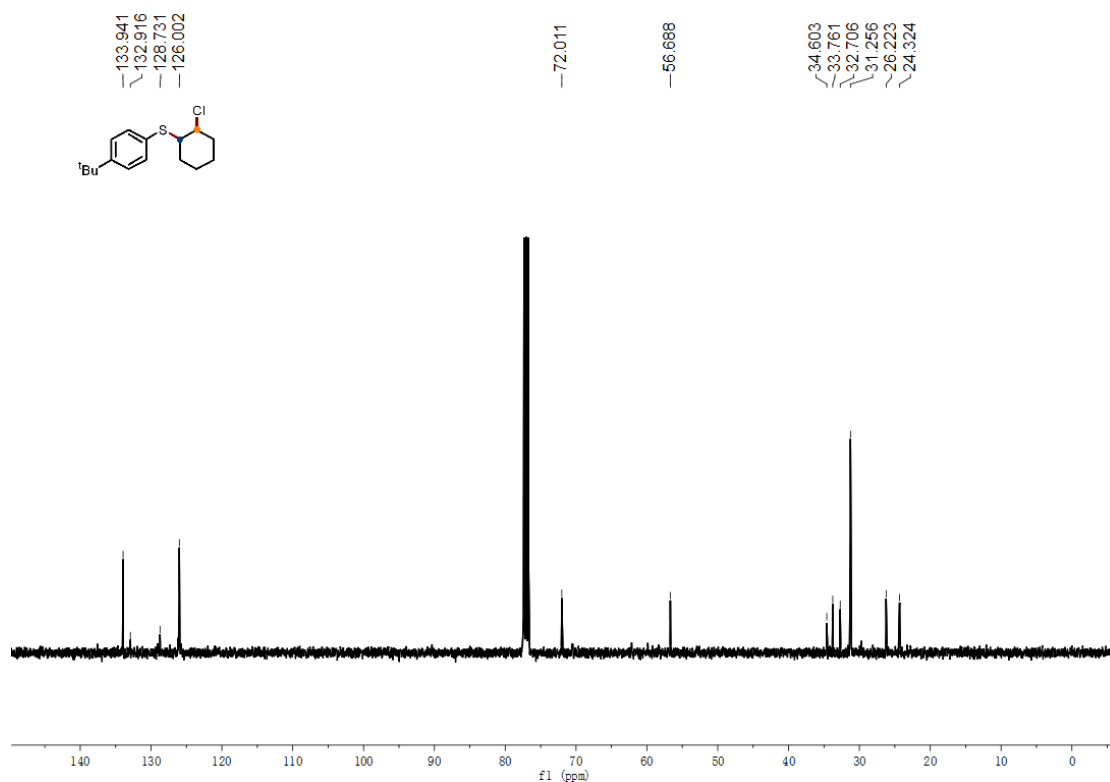

<sup>1</sup>H NMR spectrum of compound 3e

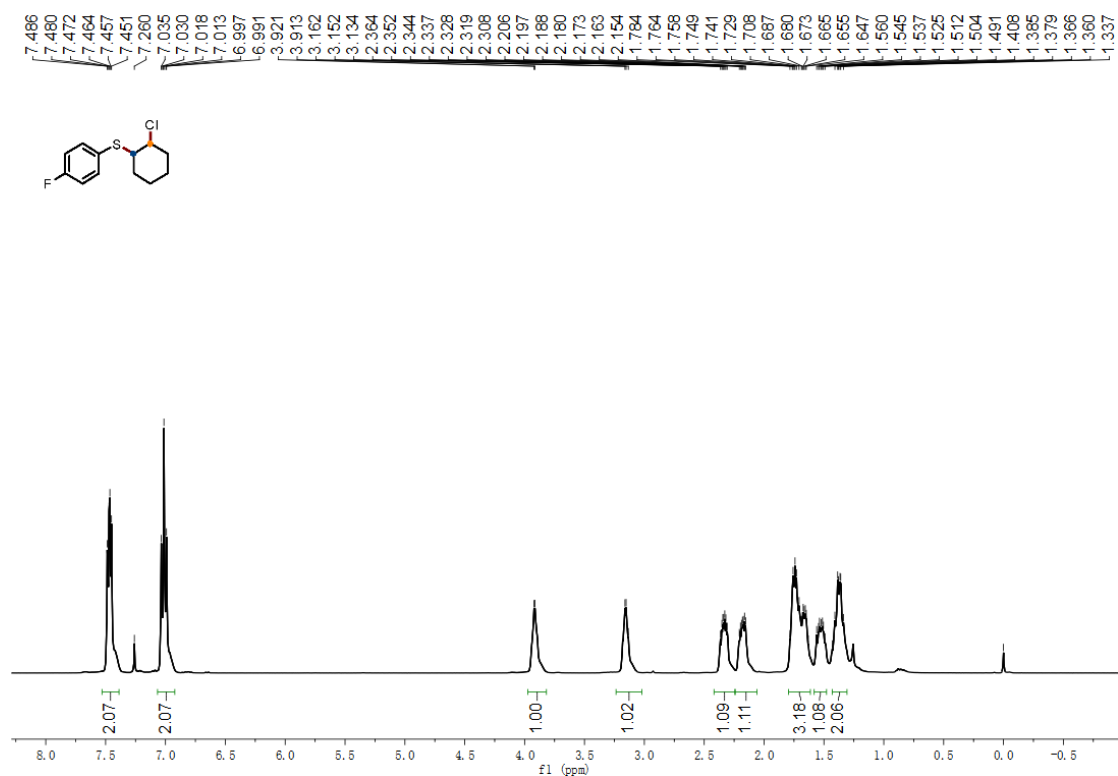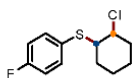

<sup>13</sup>C NMR spectrum of compound 3e

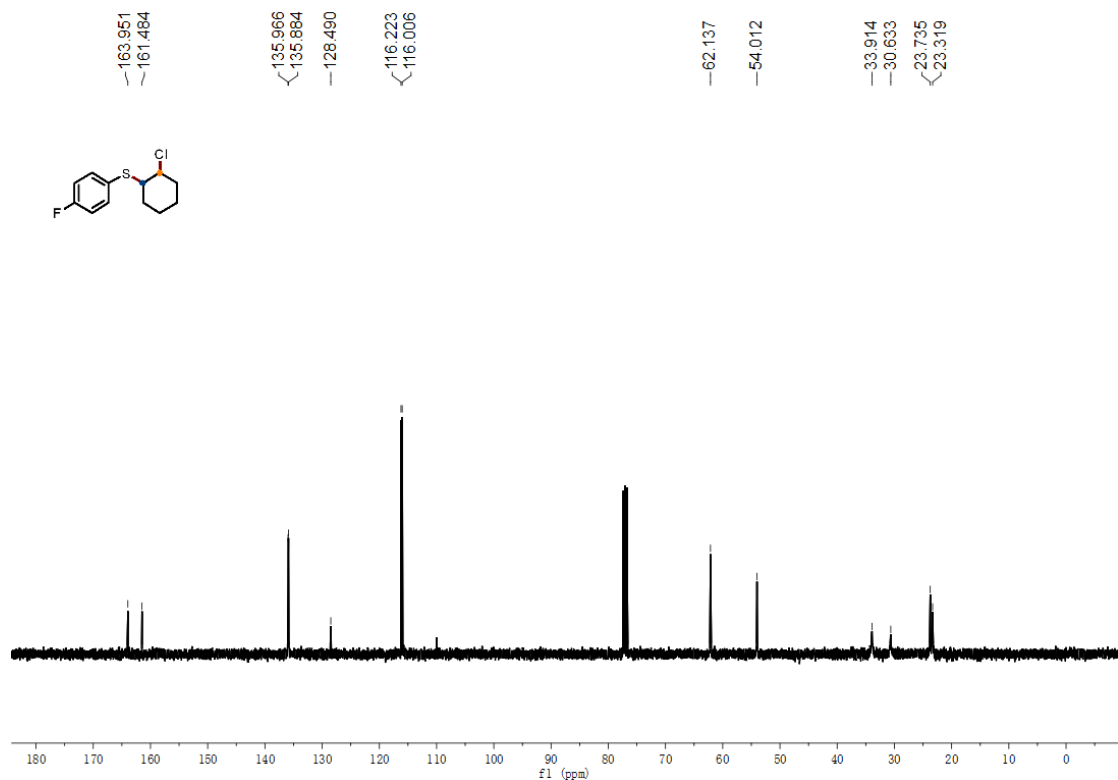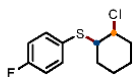

<sup>19</sup>F NMR spectrum of compound **3e**

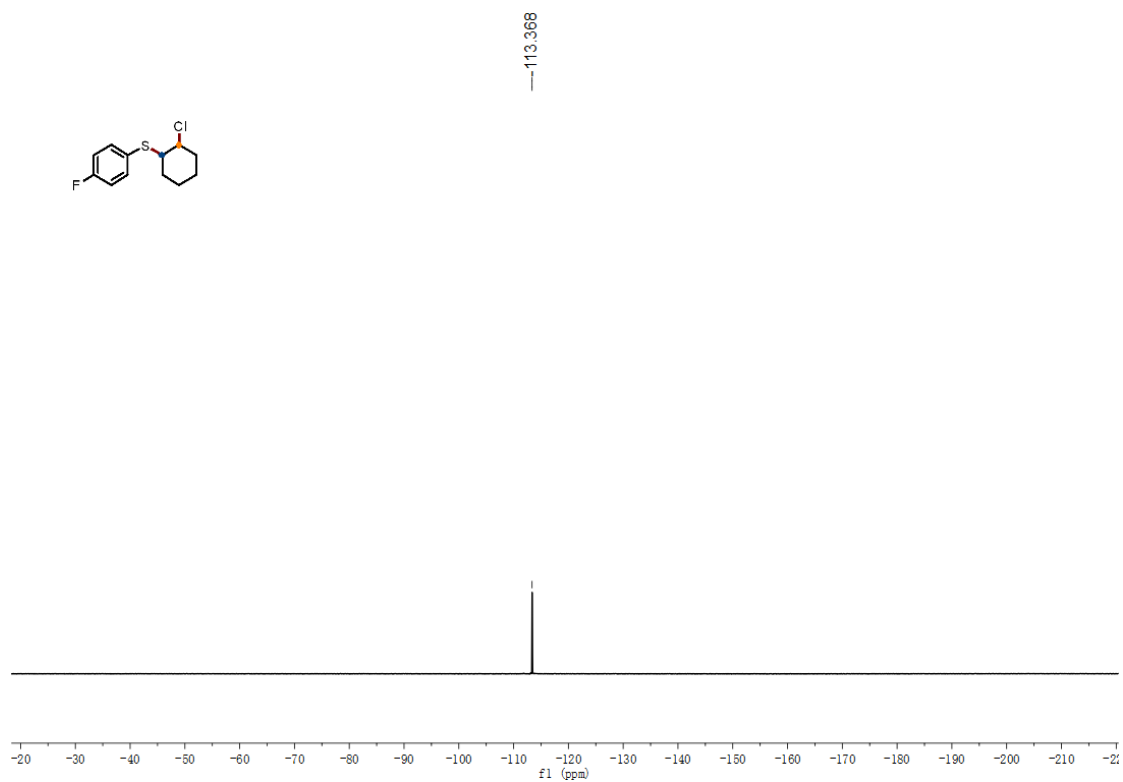

<sup>1</sup>H NMR spectrum of compound **3f**

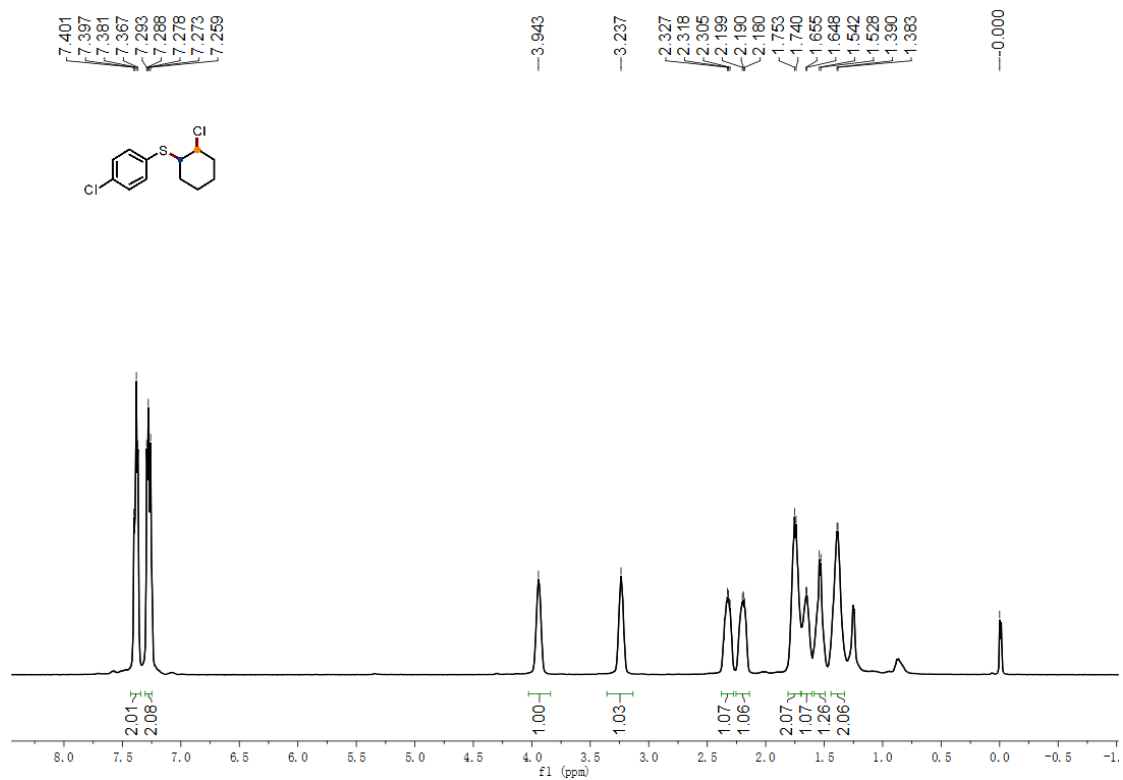



<sup>13</sup>C NMR spectrum of compound **3f**

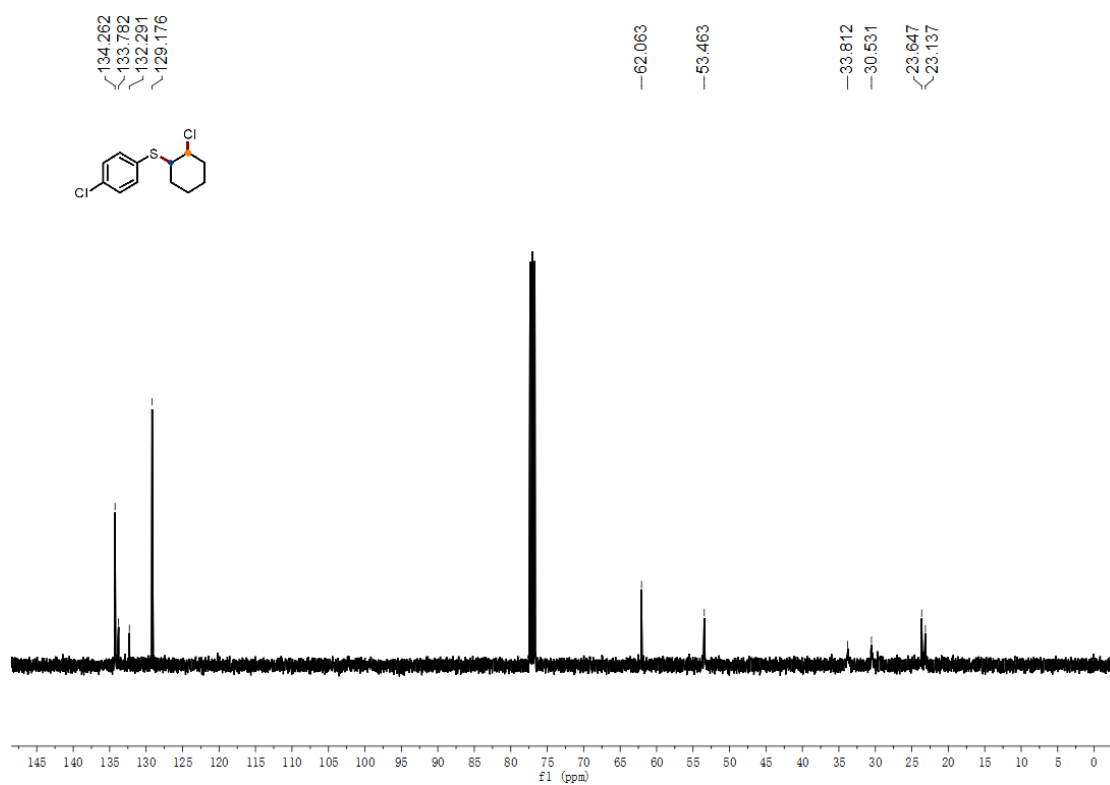

<sup>1</sup>H NMR spectrum of compound **3g**

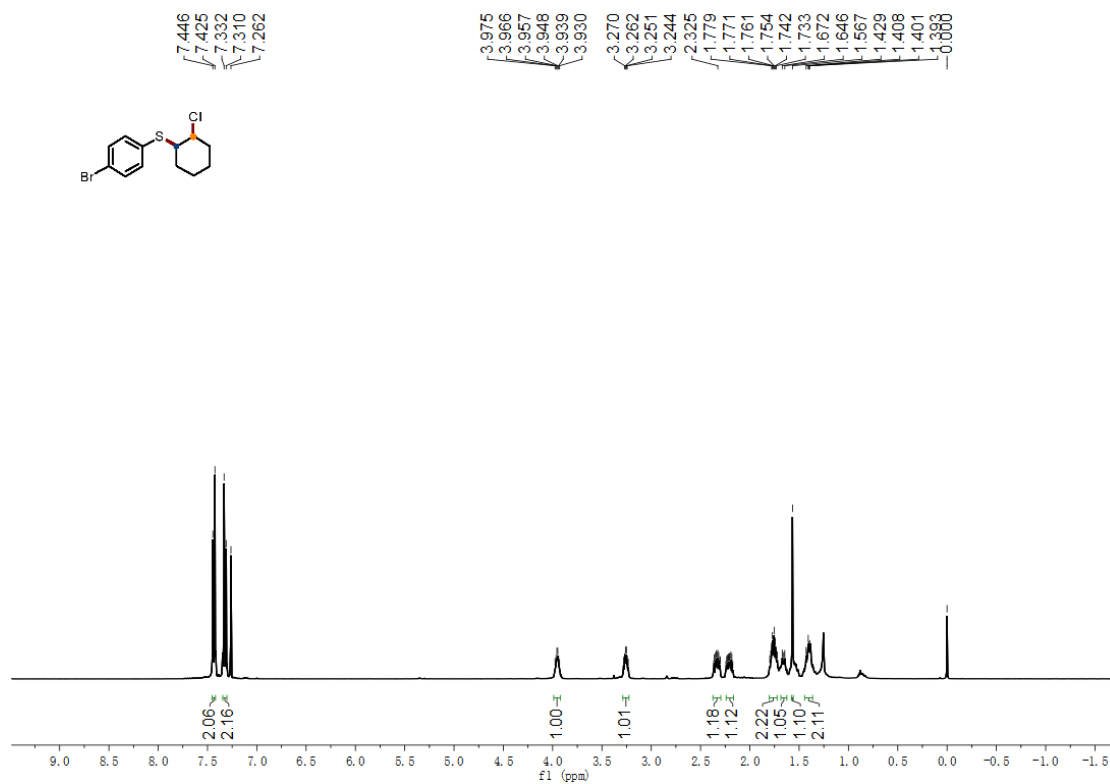

<sup>13</sup>C NMR spectrum of compound **3g**

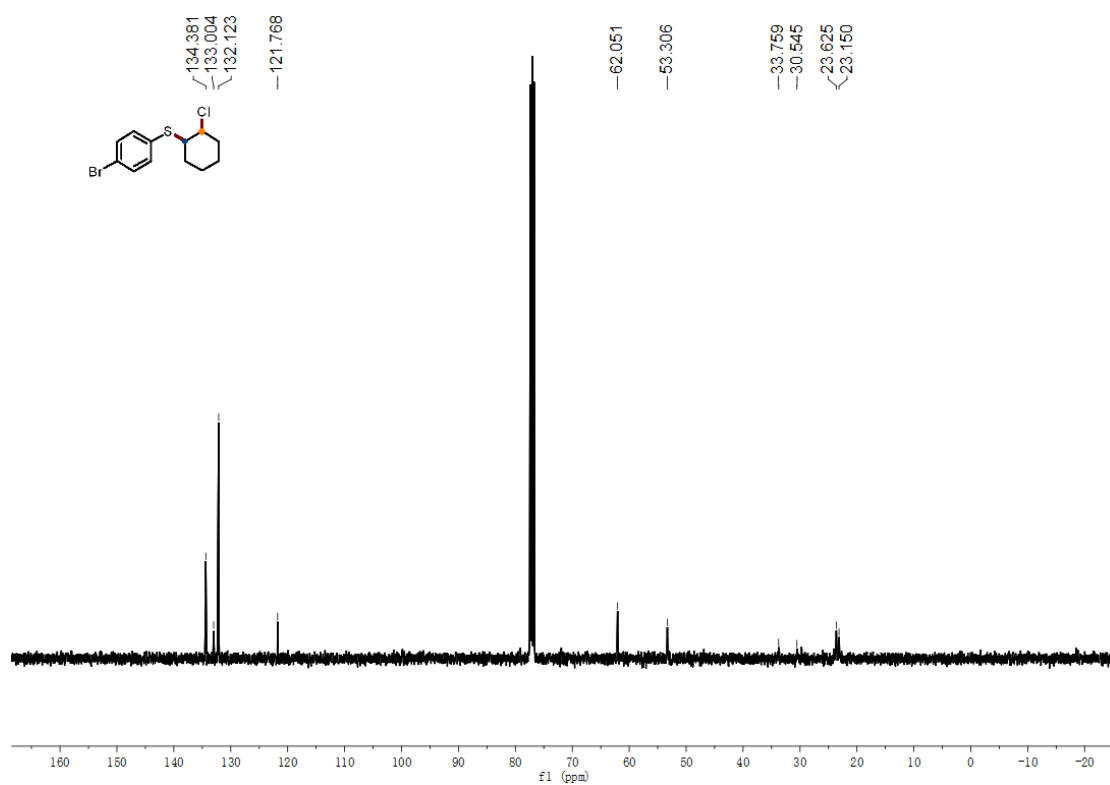

<sup>1</sup>H NMR spectrum of compound **3h**

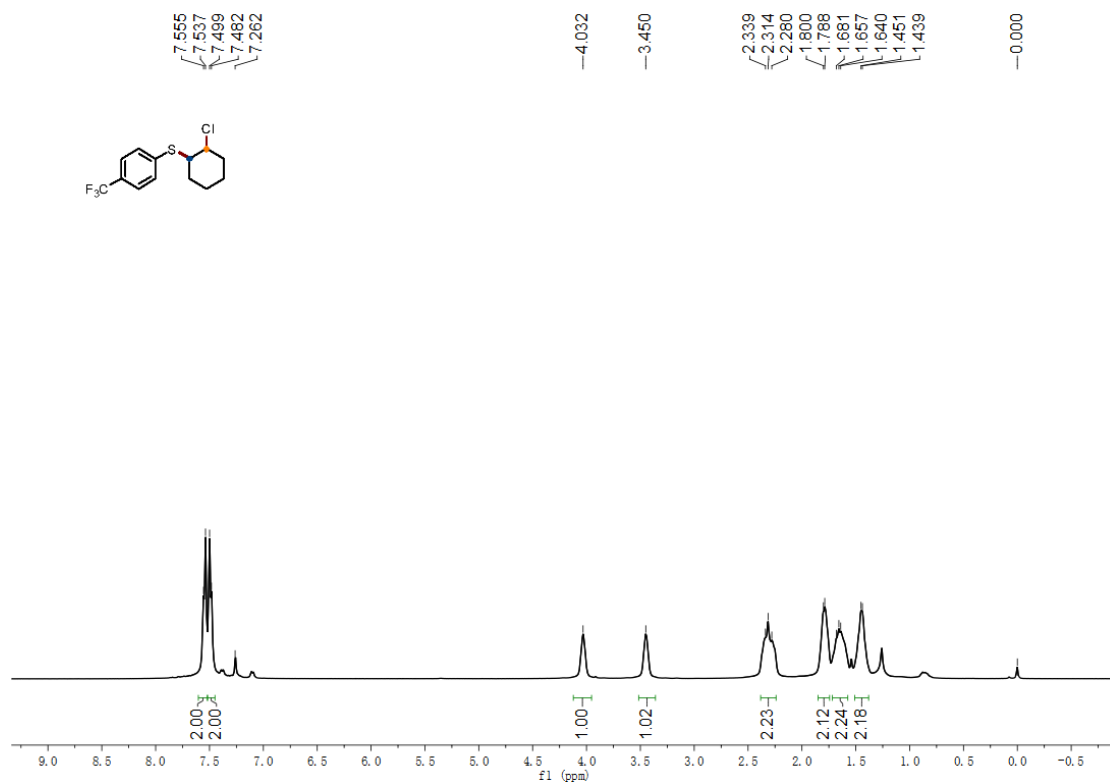

<sup>13</sup>C NMR spectrum of compound **3h**

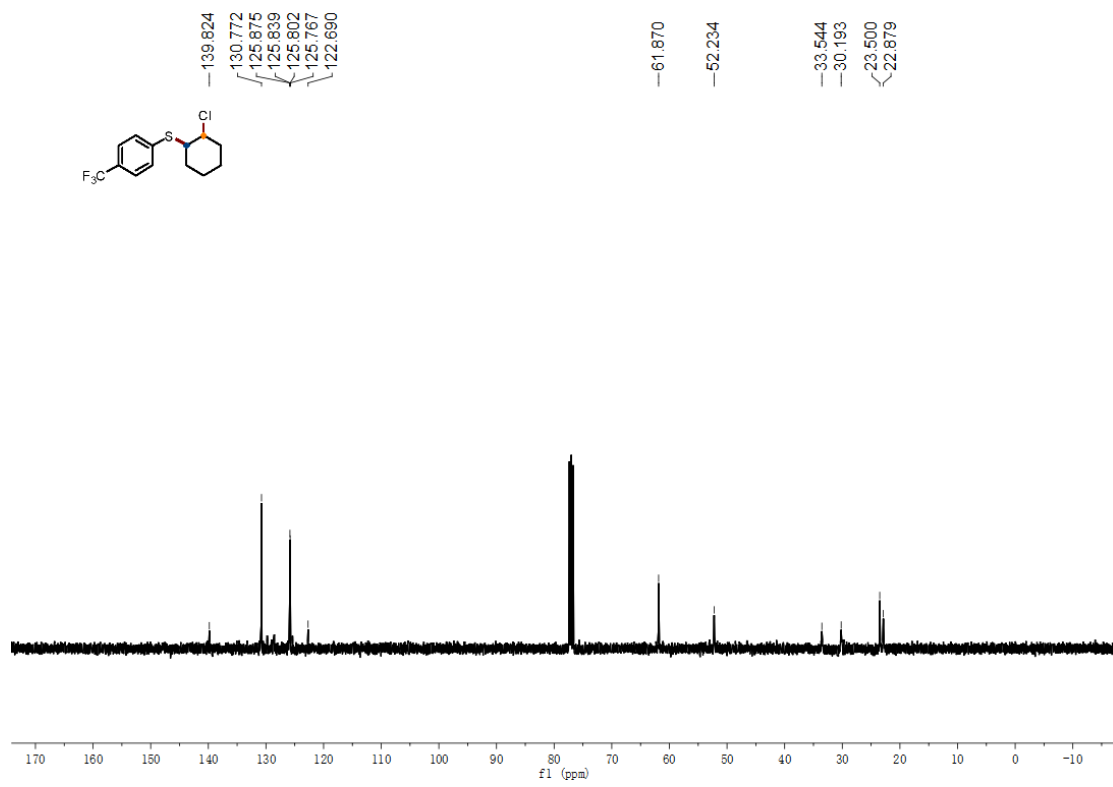

<sup>19</sup>F NMR spectrum of compound **3h**

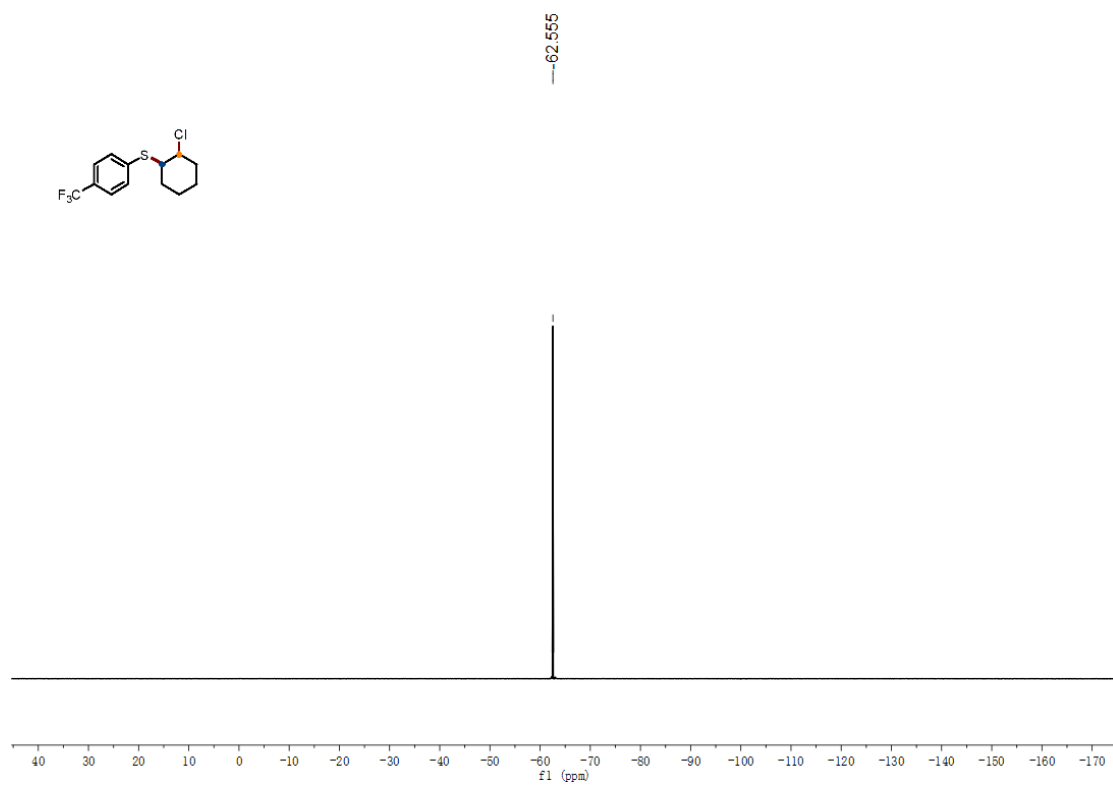

### <sup>1</sup>H NMR spectrum of compound **3i**

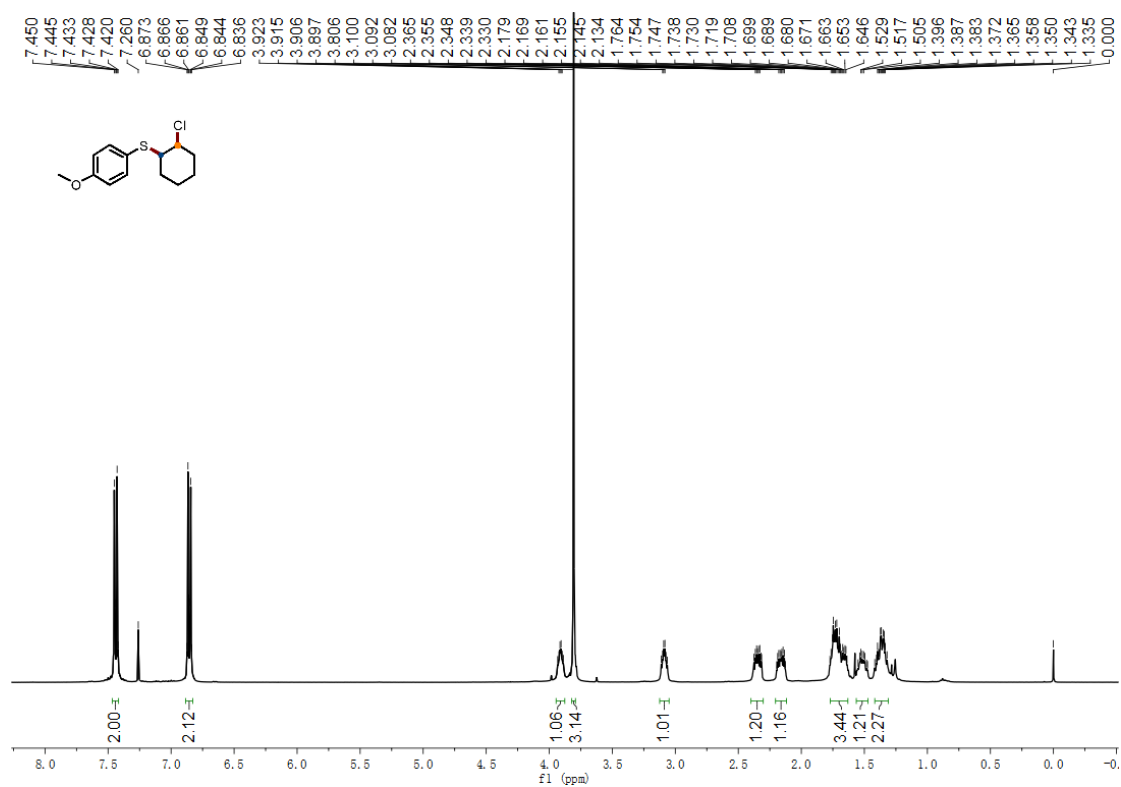

### <sup>13</sup>C NMR spectrum of compound **3i**

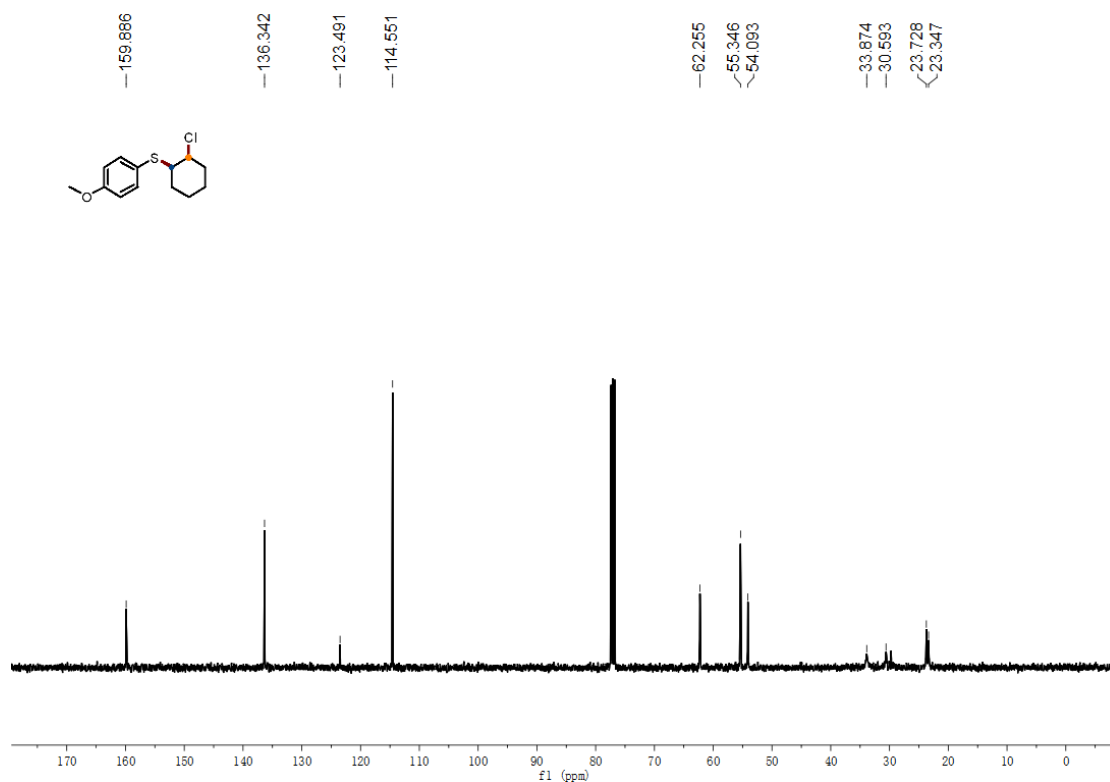

### Diastereoisomer 1

<sup>1</sup>H NMR spectrum of compound 4a

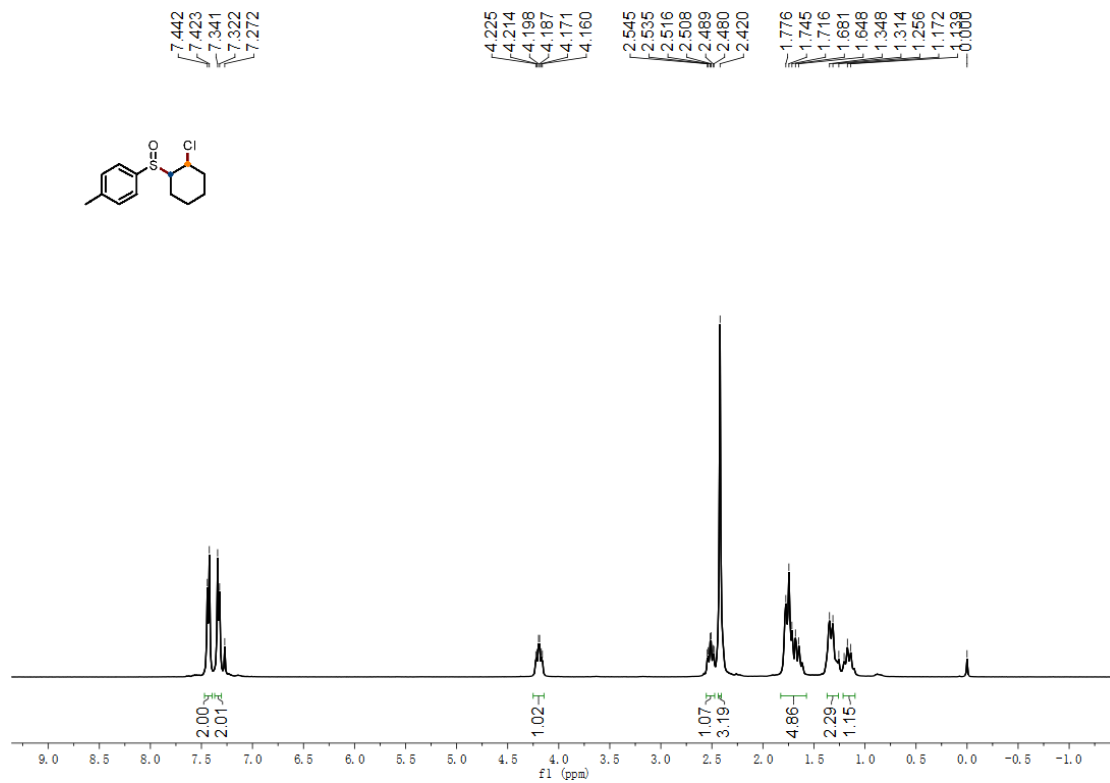

<sup>13</sup>C NMR spectrum of compound 4a

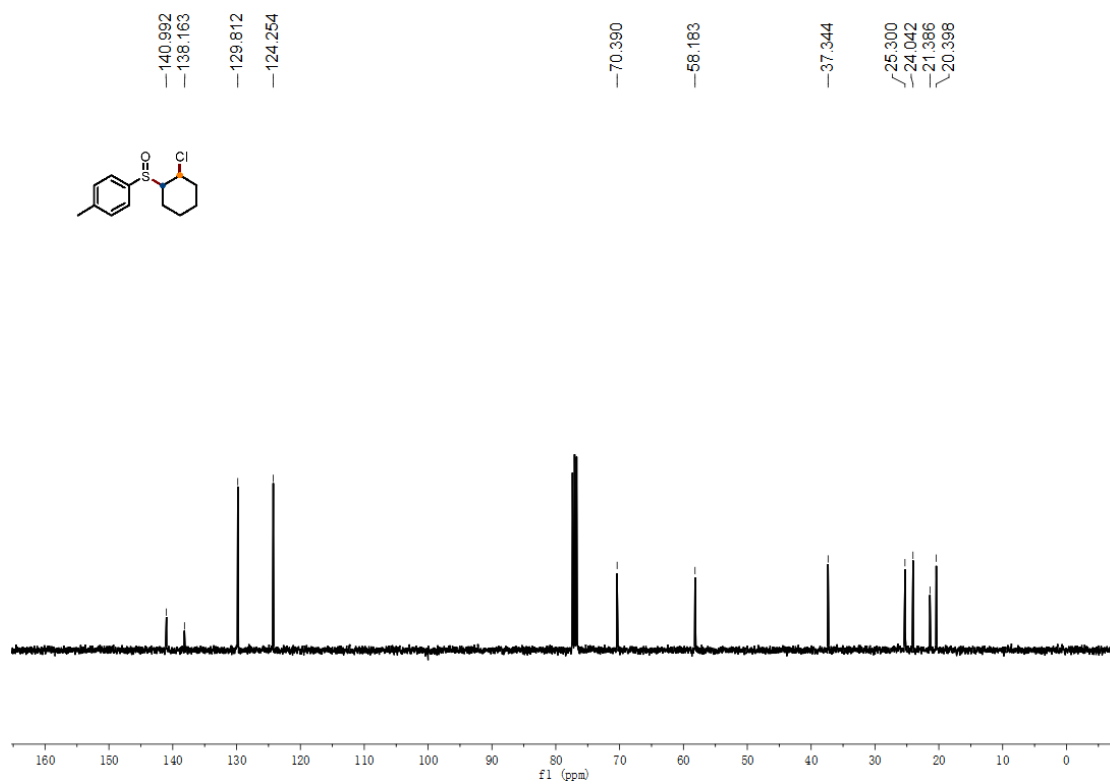

## Diastereoisomer 2

### $^1\text{H}$ NMR spectrum of compound **4a**

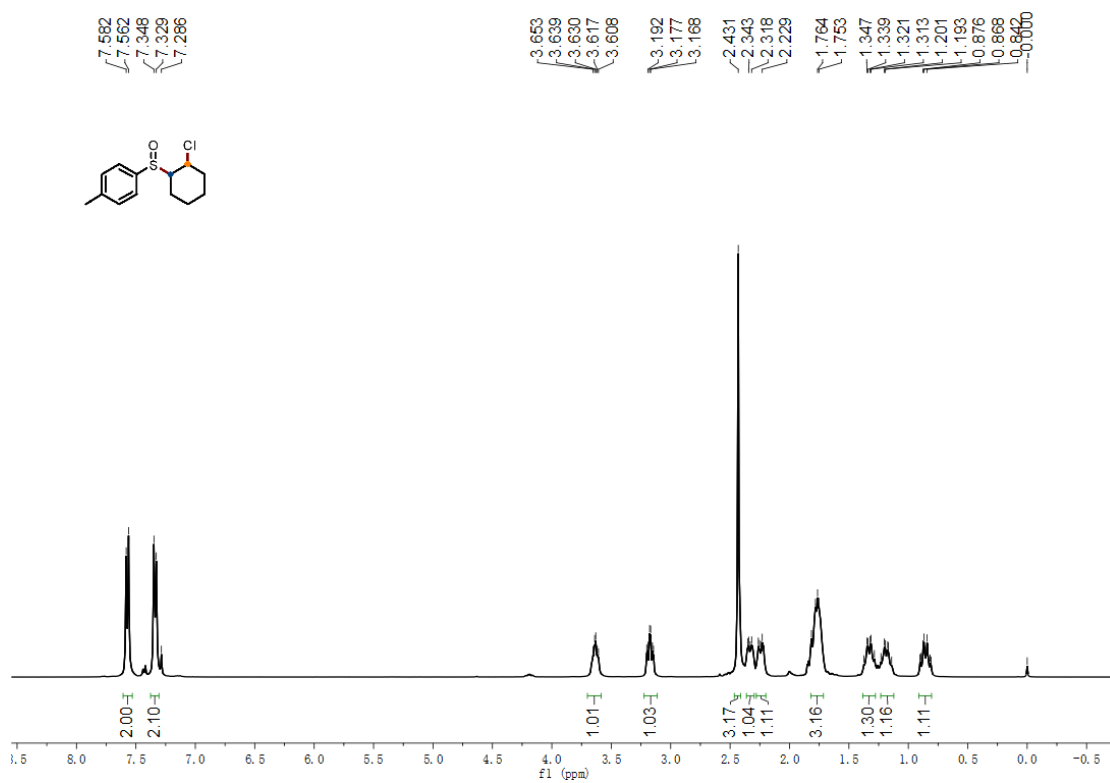

### $^{13}\text{C}$ NMR spectrum of compound **4a**

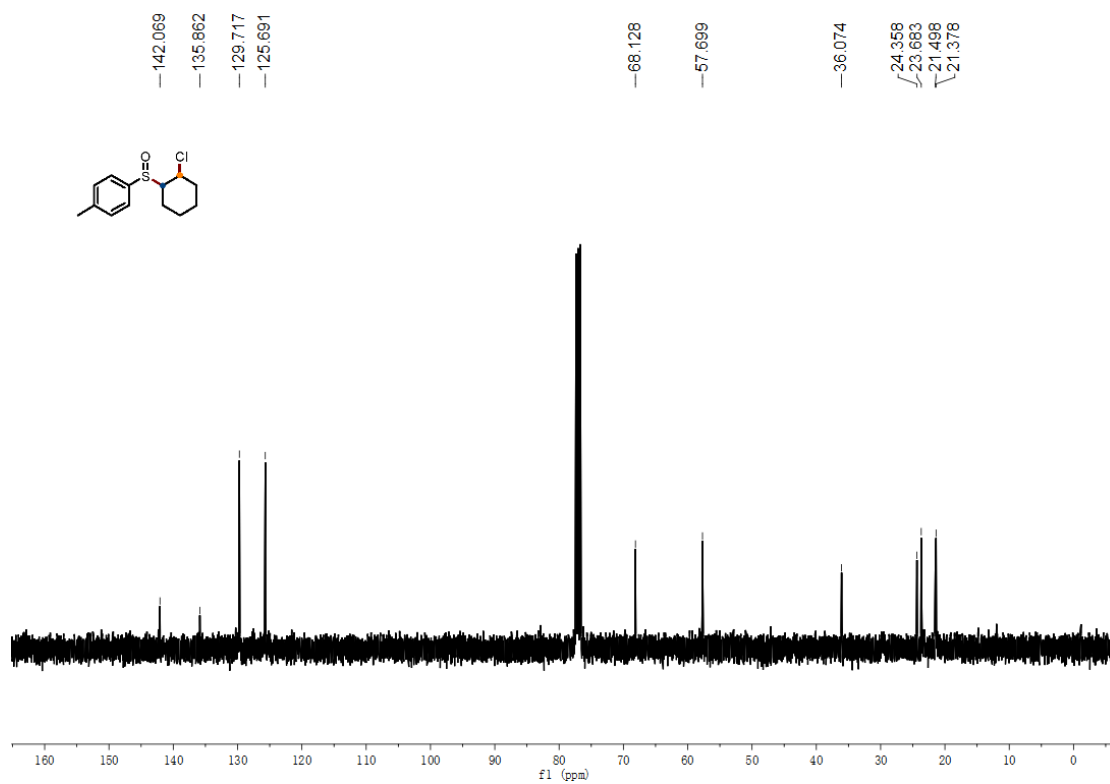

<sup>1</sup>H NMR spectrum of compound **4b**

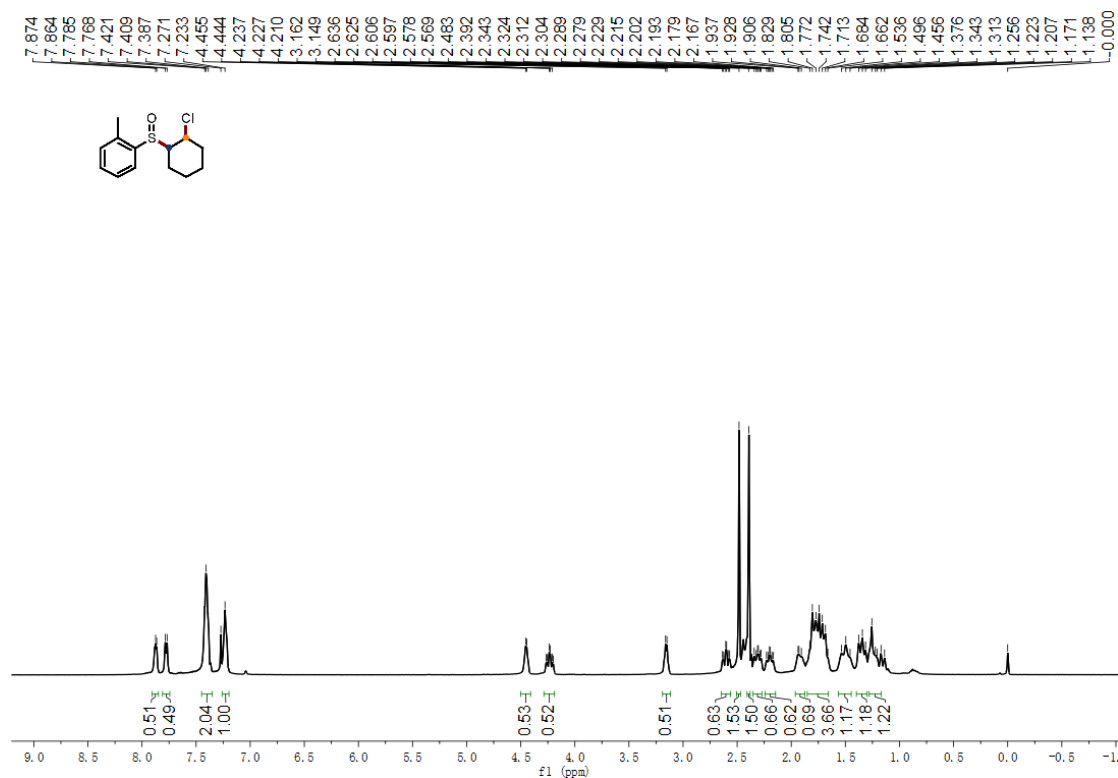

<sup>13</sup>C NMR spectrum of compound **4b**

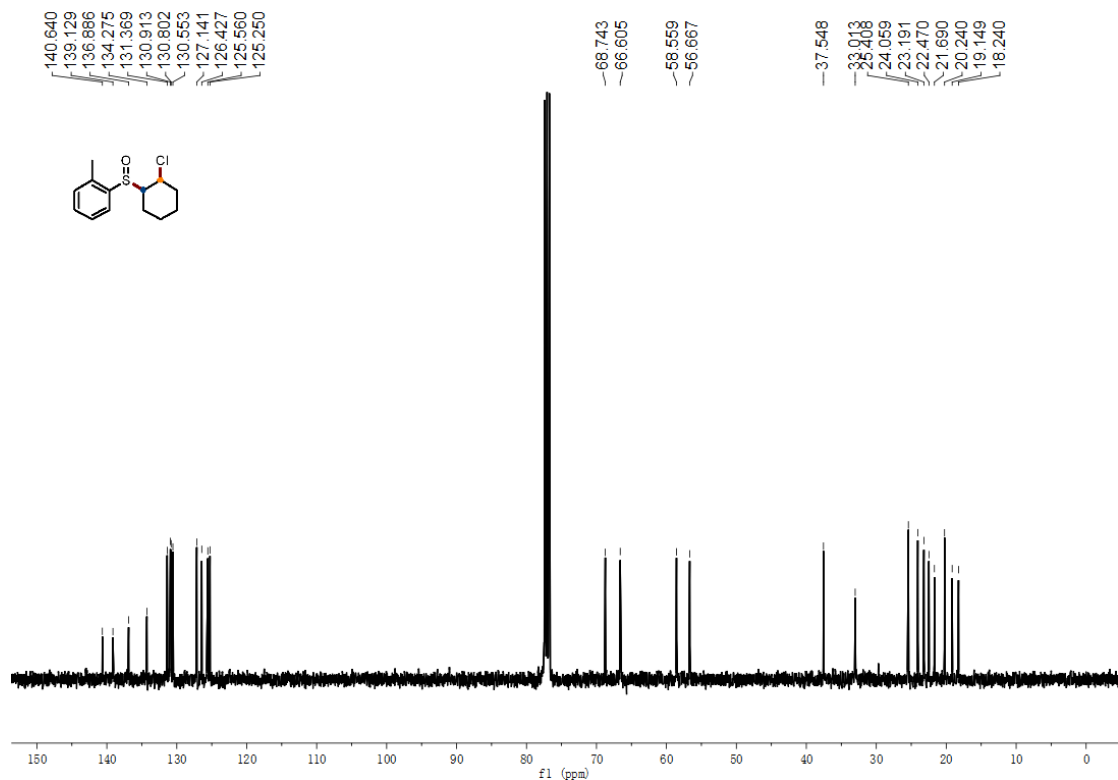

Diastereoisomer 1

<sup>1</sup>H NMR spectrum of compound 4c

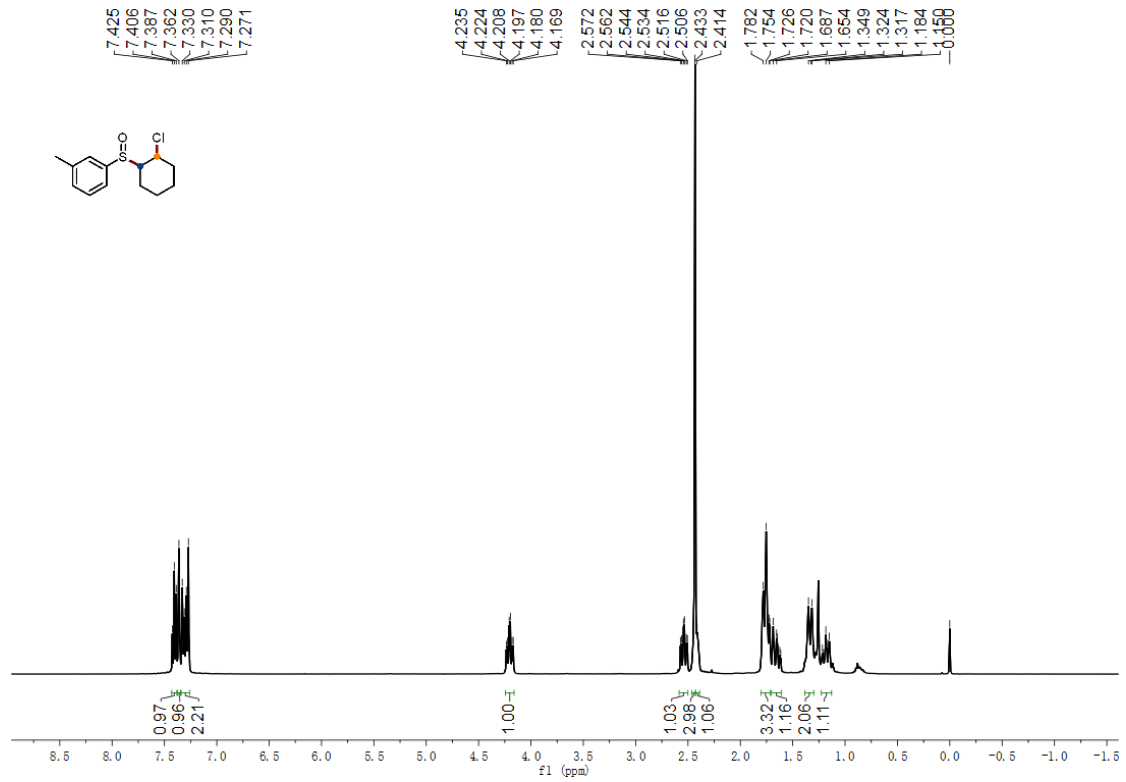

<sup>13</sup>C NMR spectrum of compound 4c

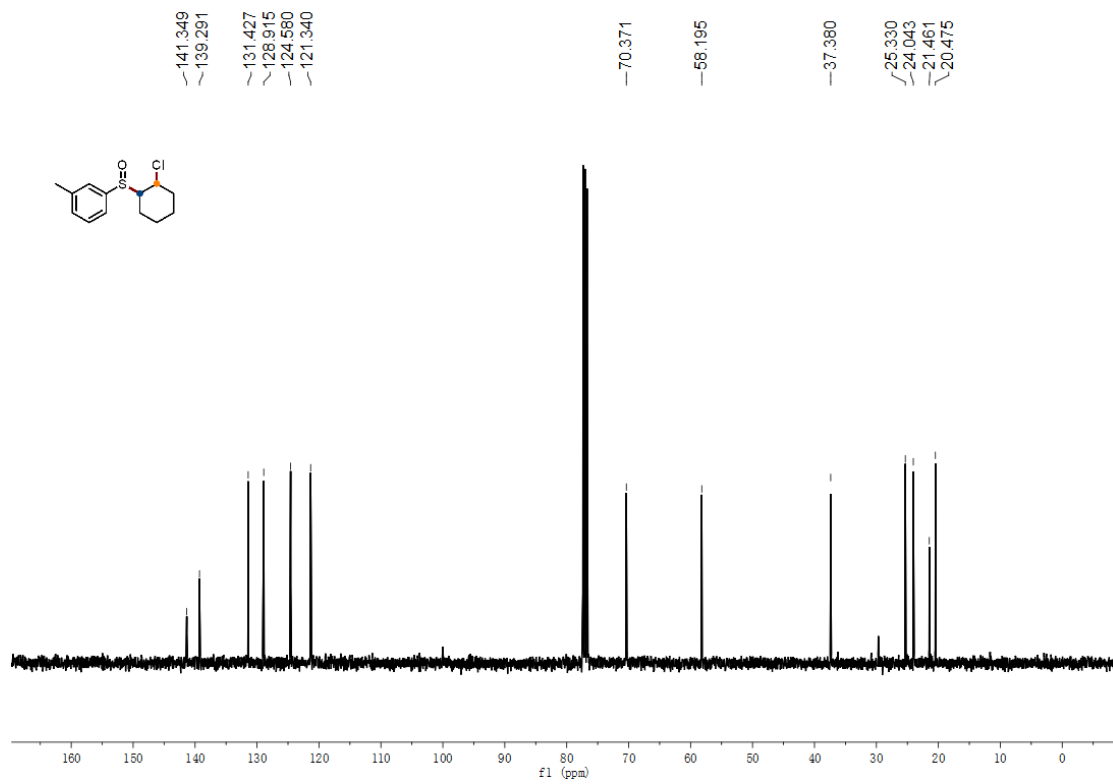



### Diastereoisomer 2

### <sup>1</sup>H NMR spectrum of compound 4c

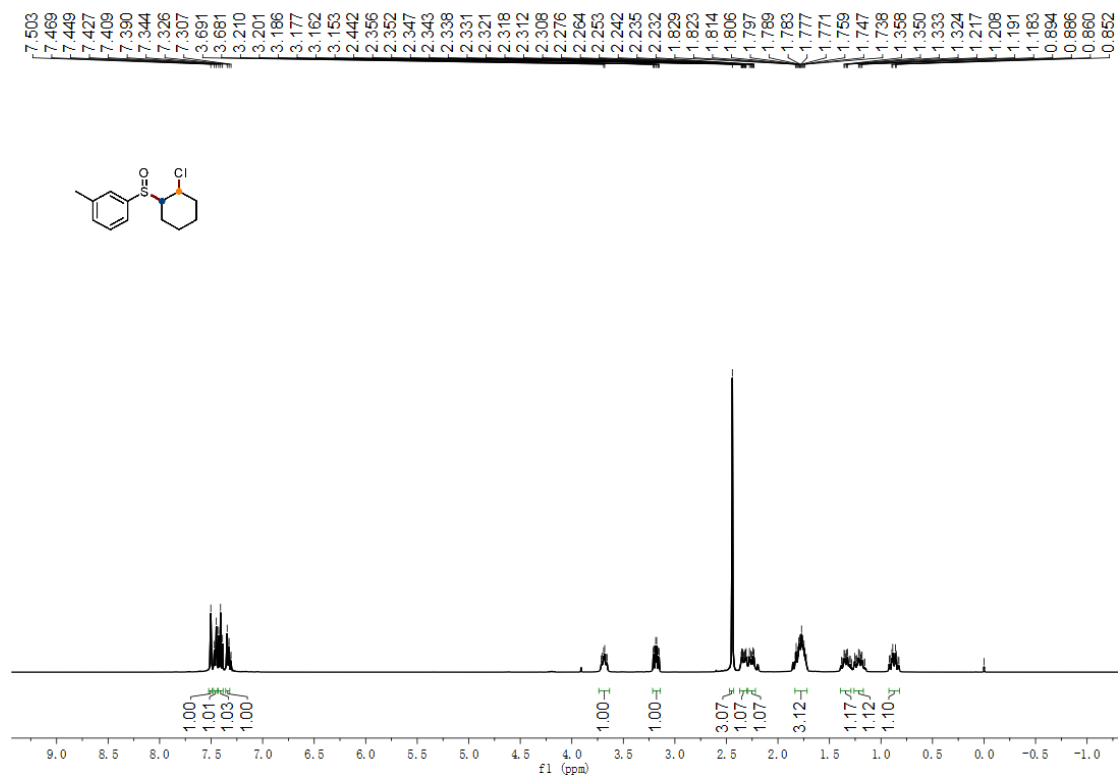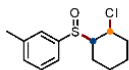

### <sup>13</sup>C NMR spectrum of compound 4c

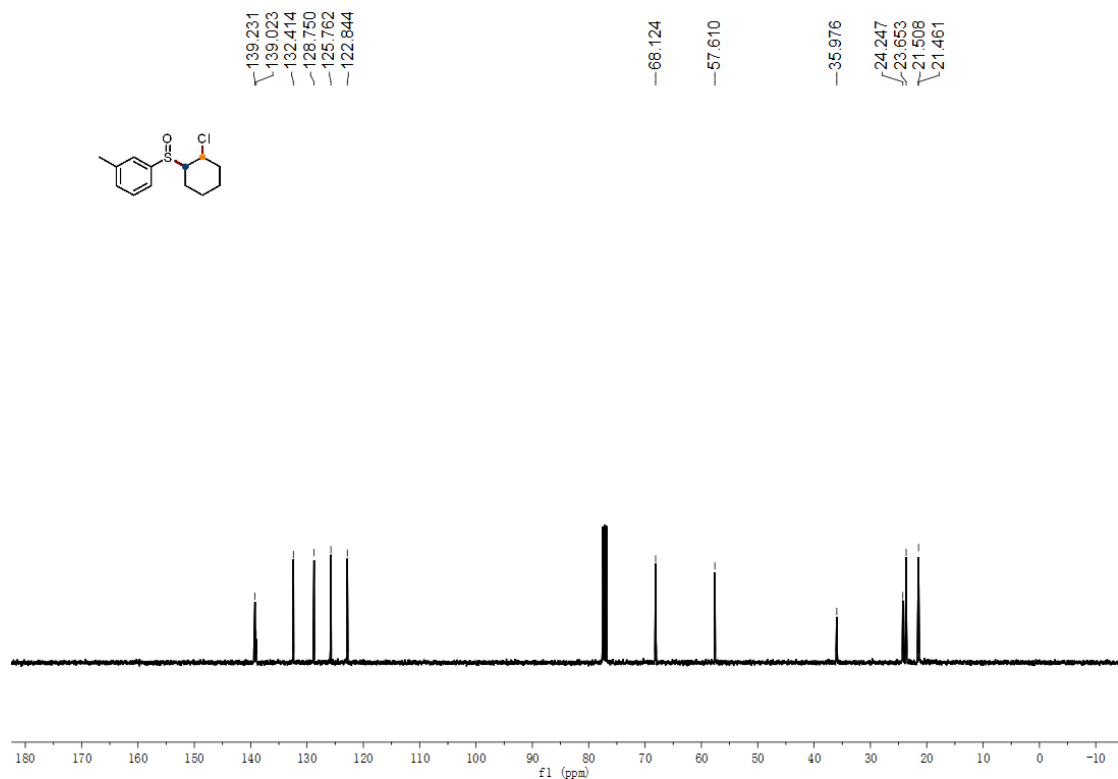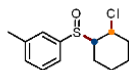

<sup>1</sup>H NMR spectrum of compound 4d

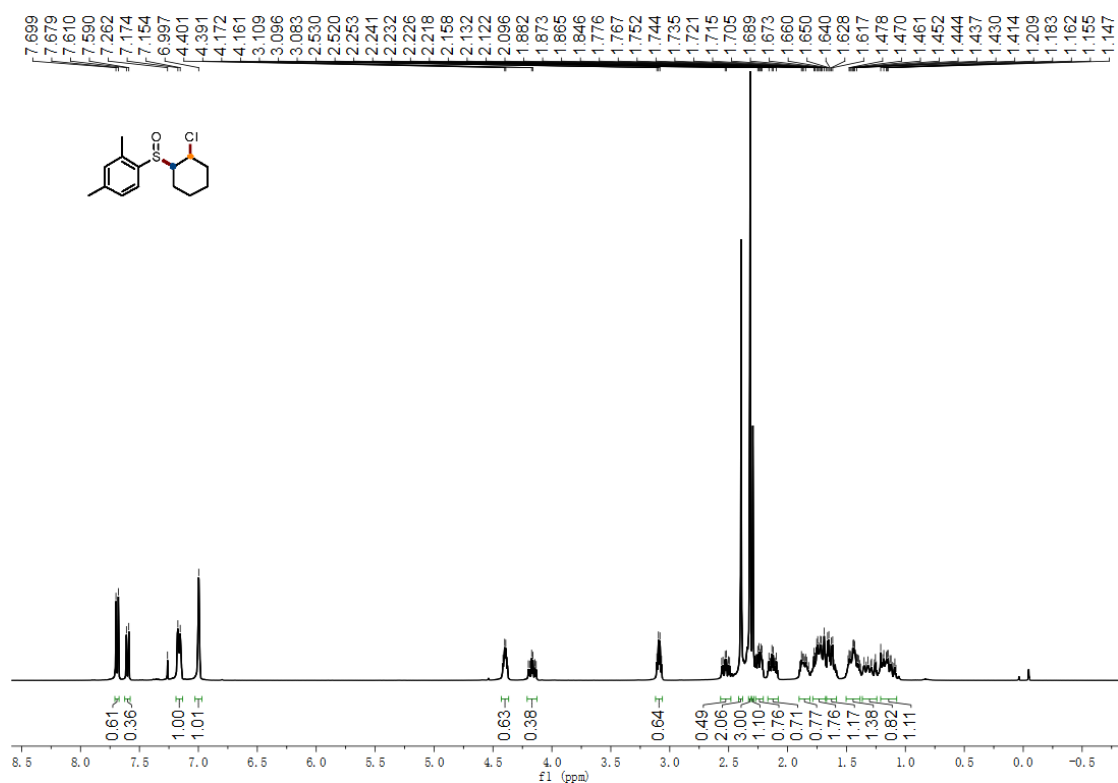

<sup>13</sup>C NMR spectrum of compound 4d

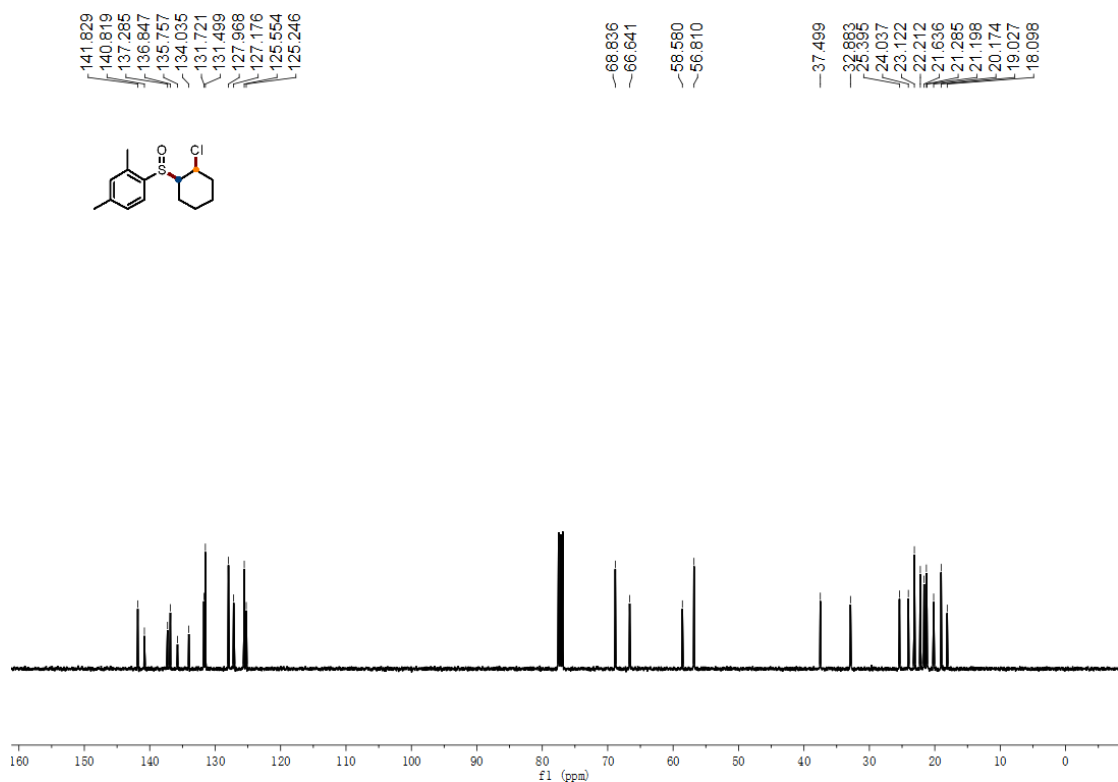

<sup>1</sup>H NMR spectrum of compound 4e

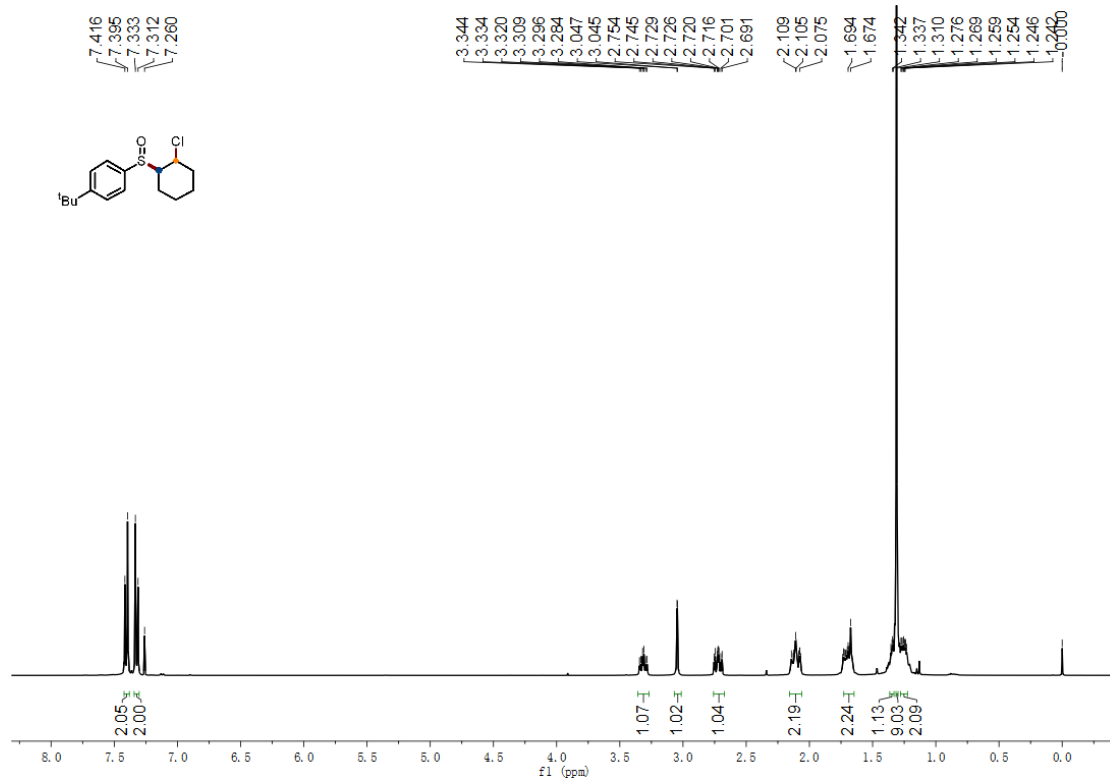

<sup>13</sup>C NMR spectrum of compound 4e

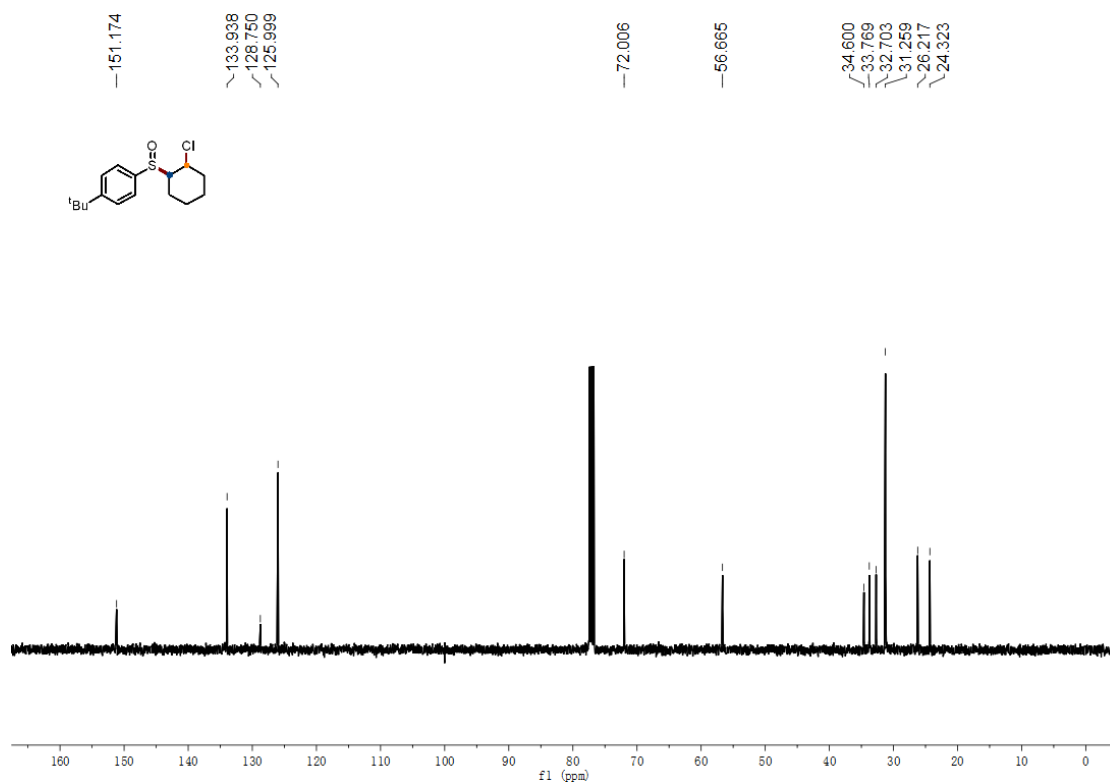

<sup>1</sup>H NMR spectrum of compound 4f

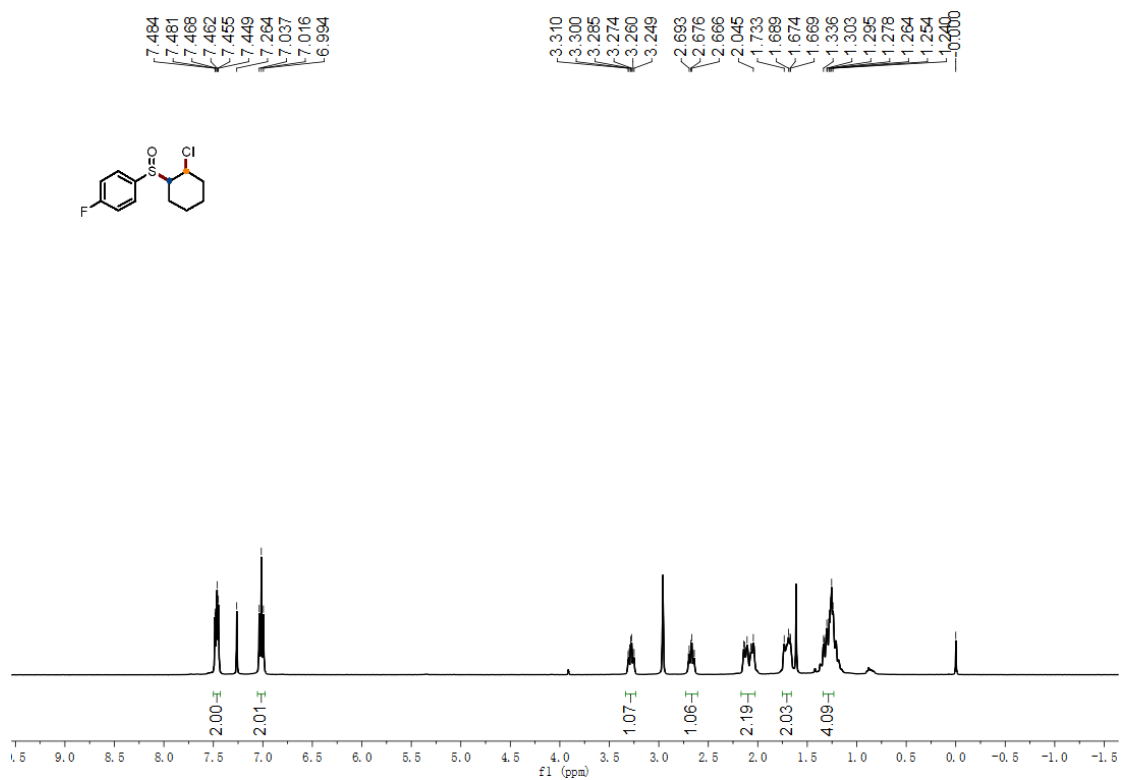

<sup>13</sup>C NMR spectrum of compound 4f

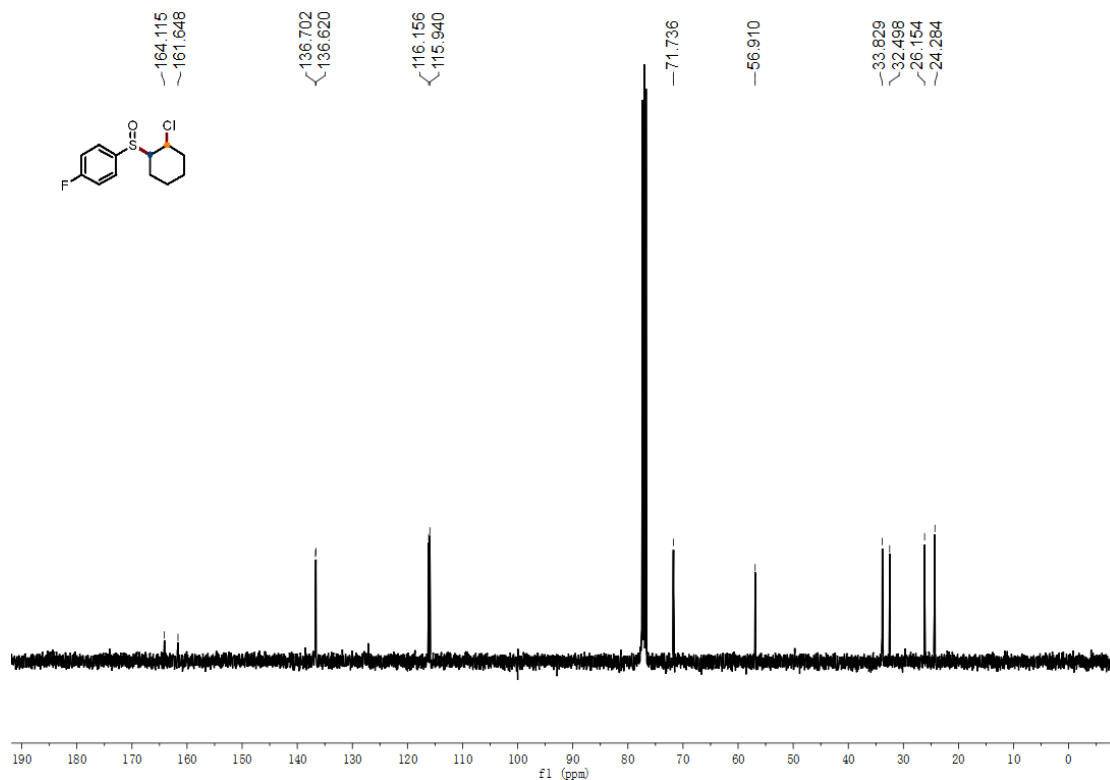

<sup>19</sup>F NMR spectrum of compound **4f**

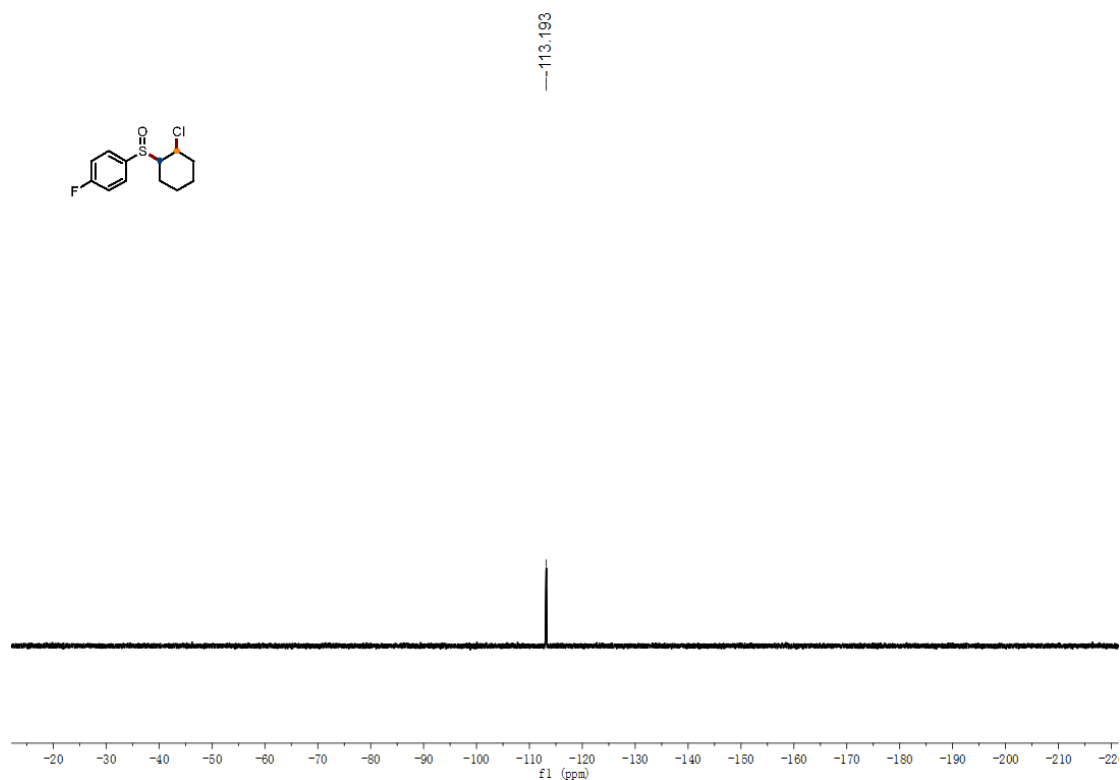

<sup>1</sup>H NMR spectrum of compound **4g**

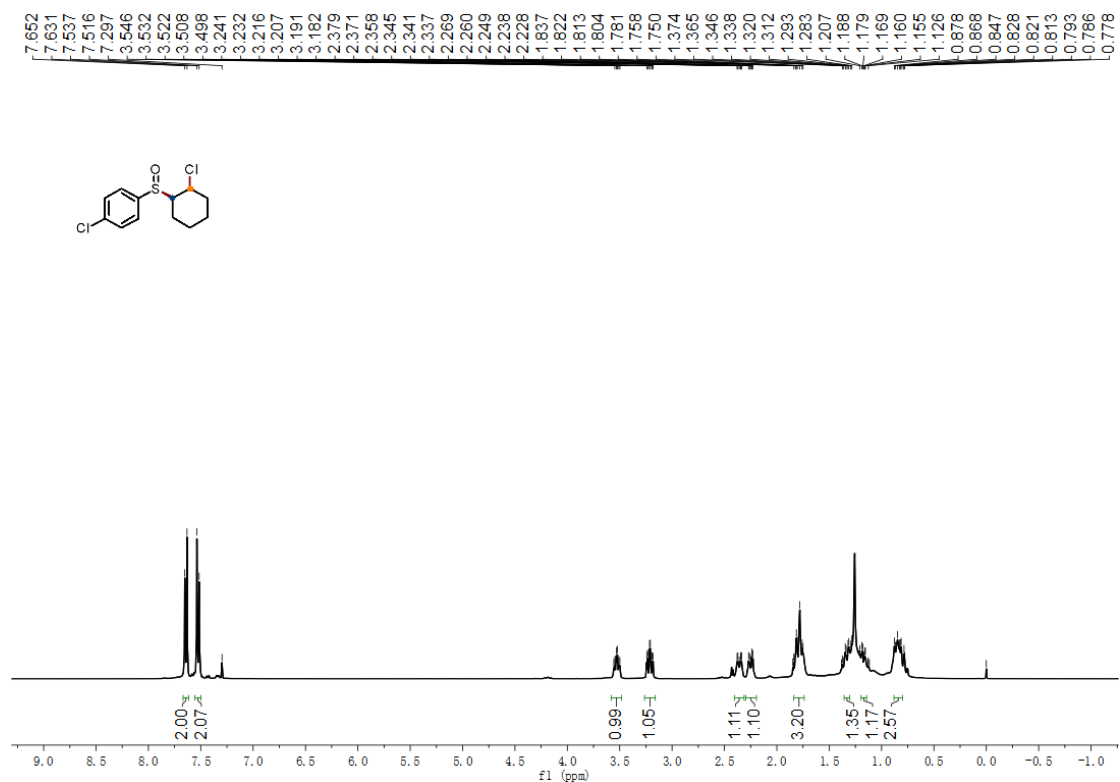

<sup>13</sup>C NMR spectrum of compound **4g**

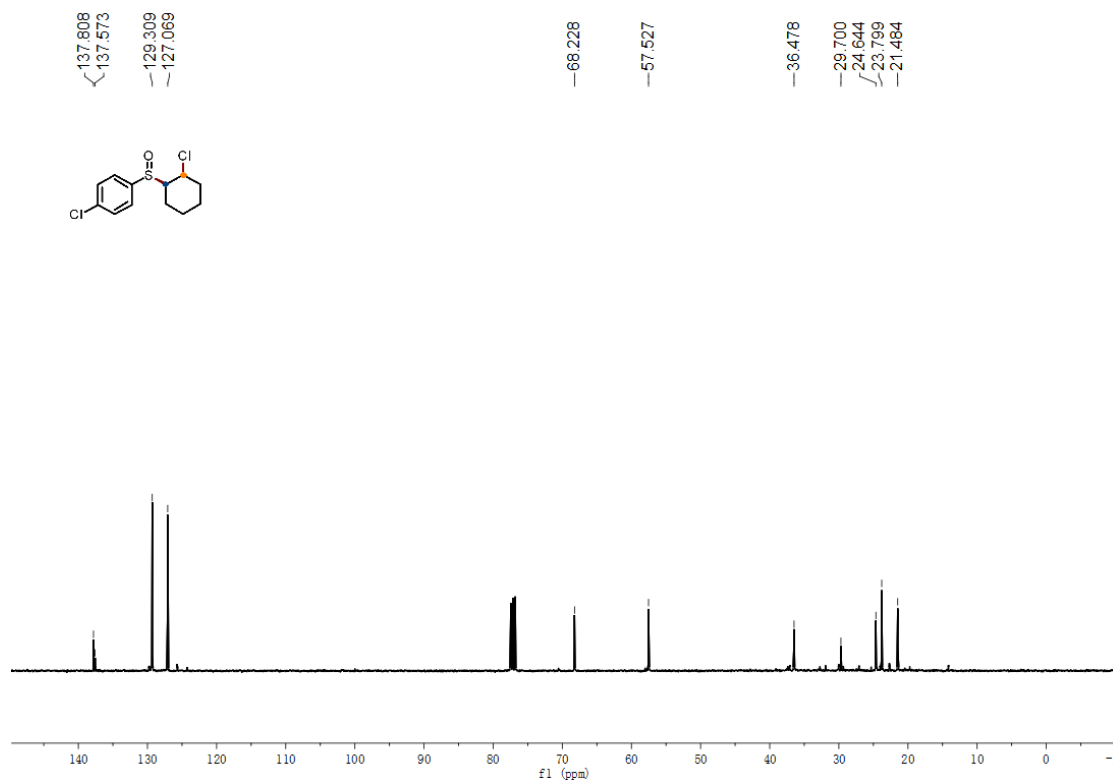

<sup>1</sup>H NMR spectrum of compound **4h**

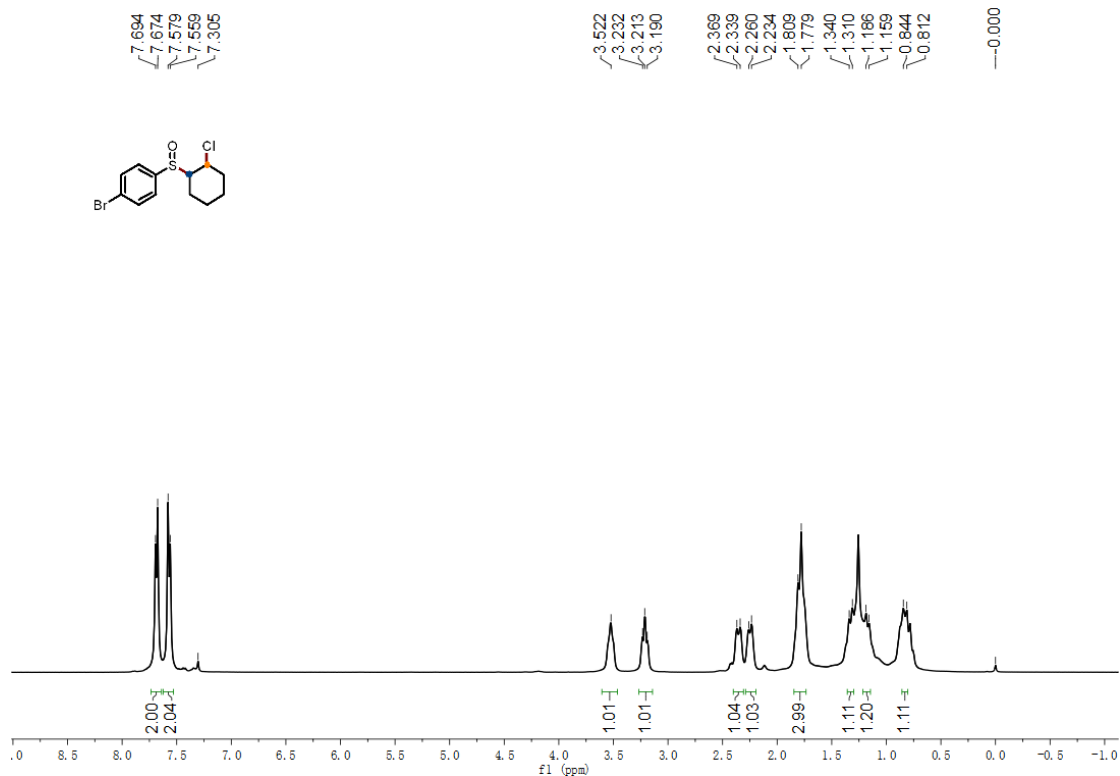

<sup>13</sup>C NMR spectrum of compound **4h**

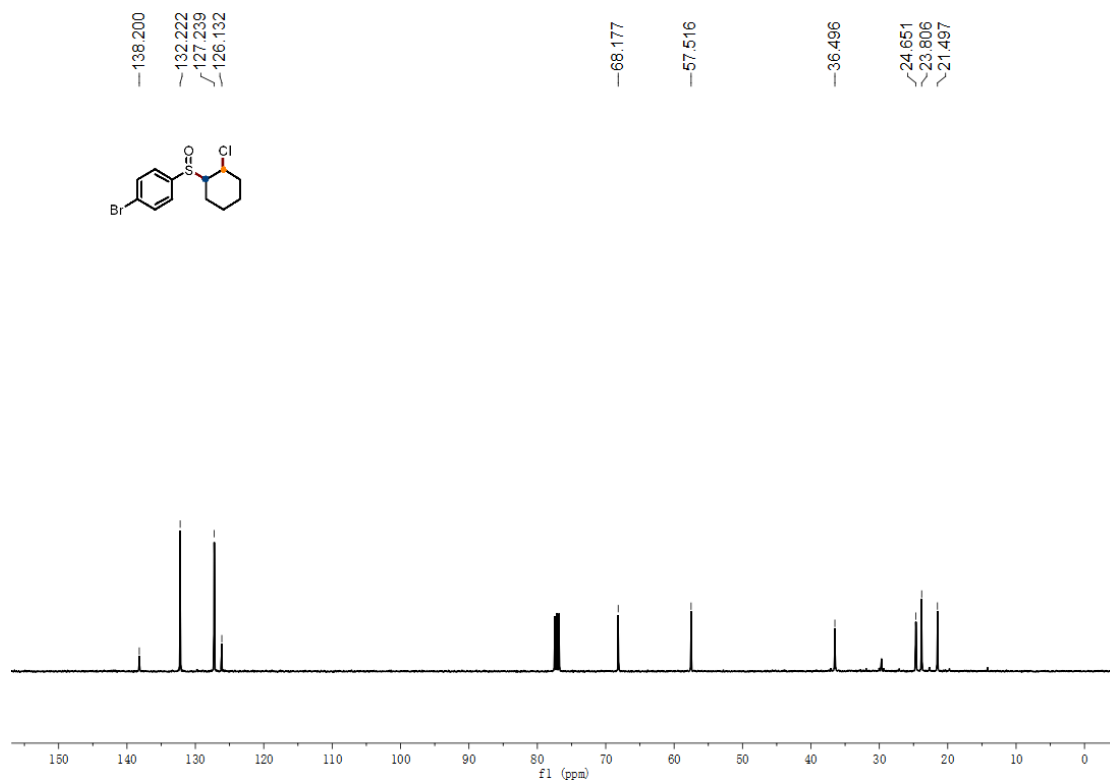

**Diastereoisomer 1**

<sup>1</sup>H NMR spectrum of compound **4i**

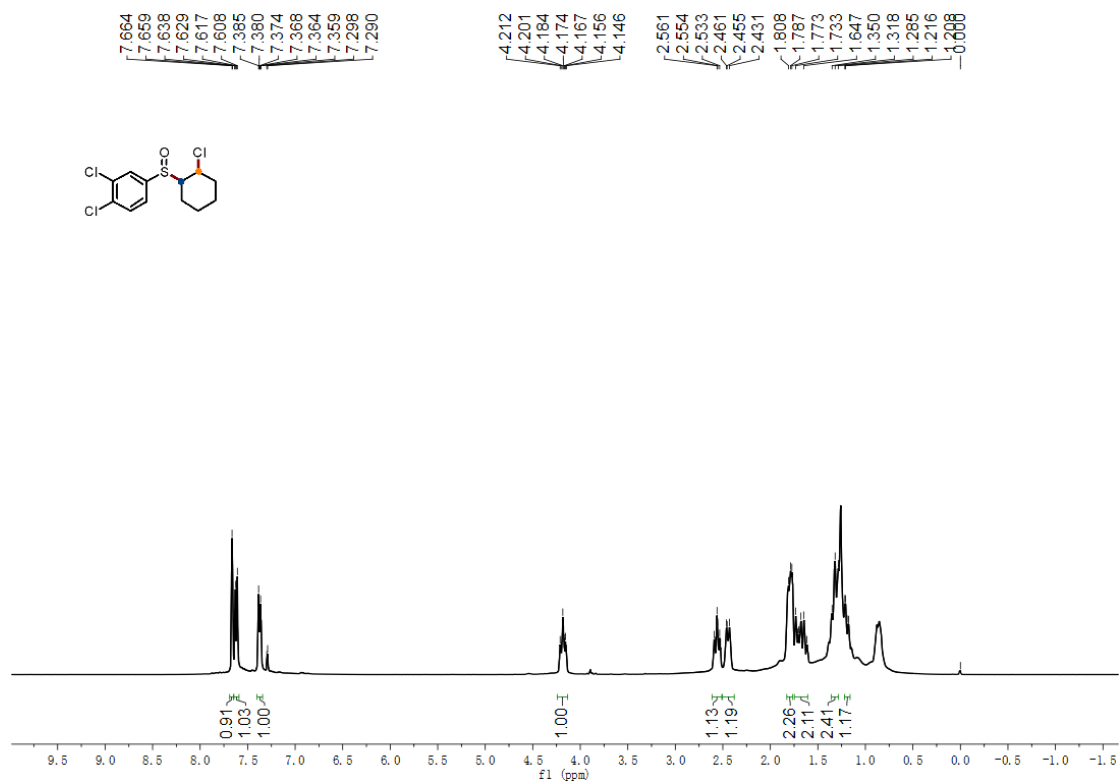

<sup>13</sup>C NMR spectrum of compound 4i

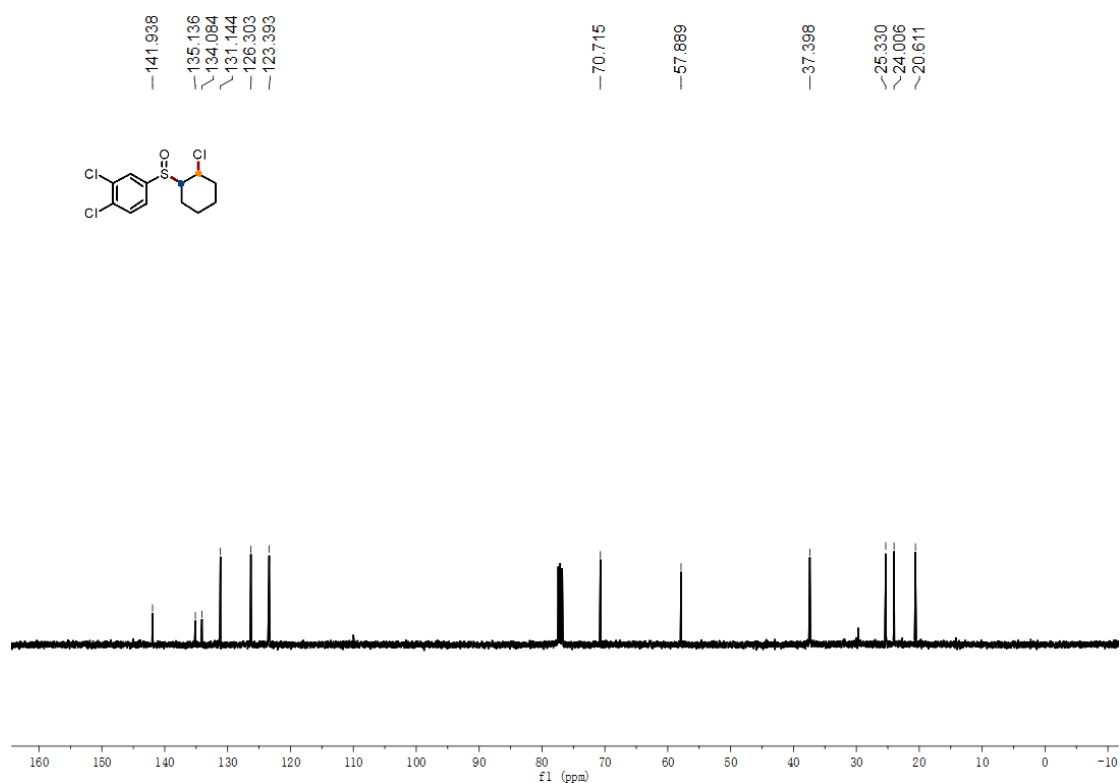

Diastereoisomer 2

<sup>1</sup>H NMR spectrum of compound 4i

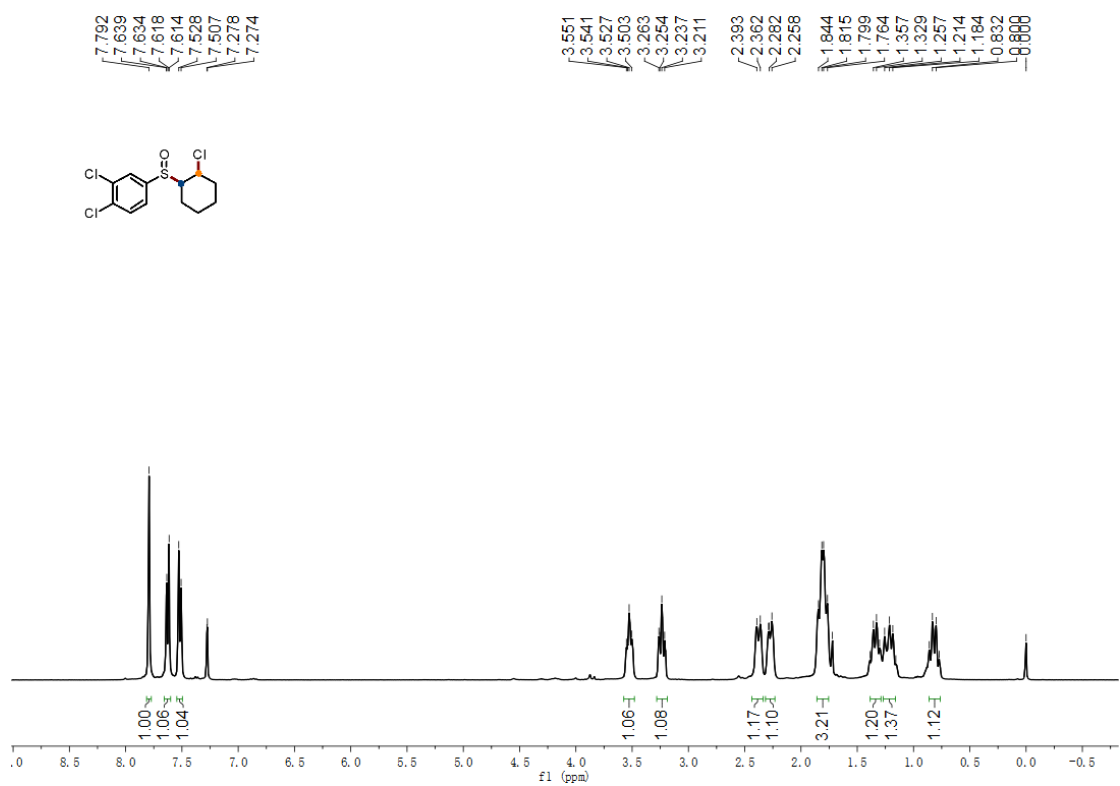



<sup>13</sup>C NMR spectrum of compound 4i

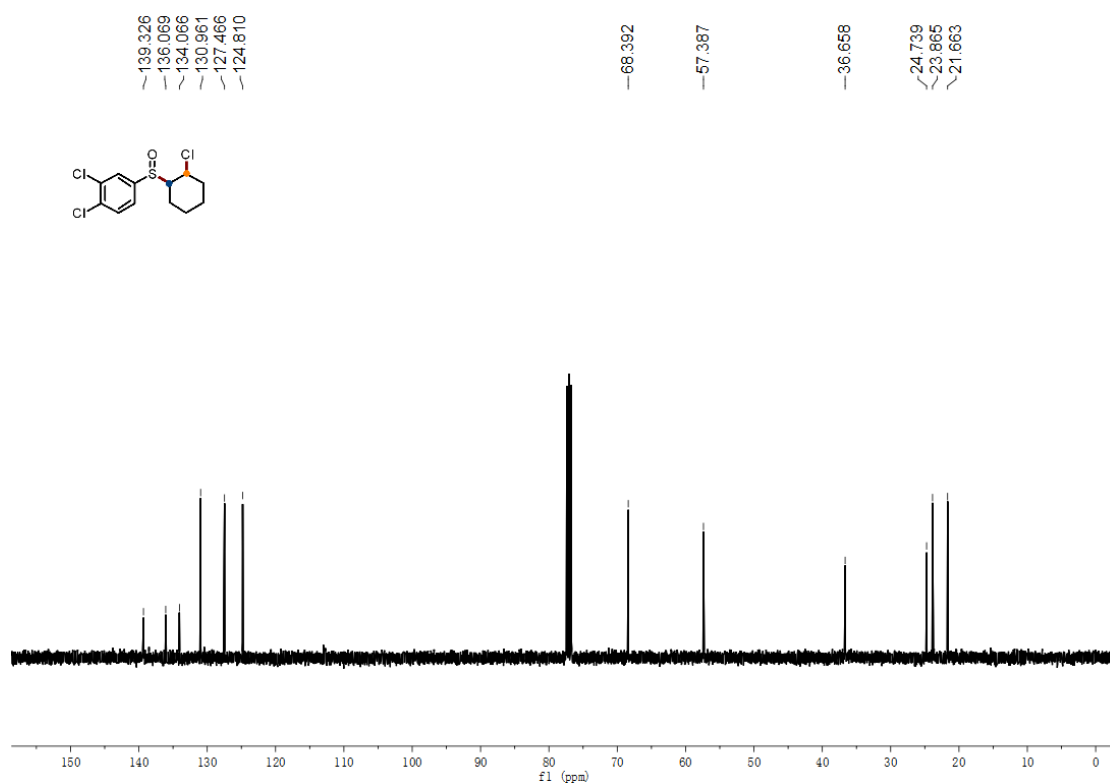

Diastereoisomer 1

<sup>1</sup>H NMR spectrum of compound 4j

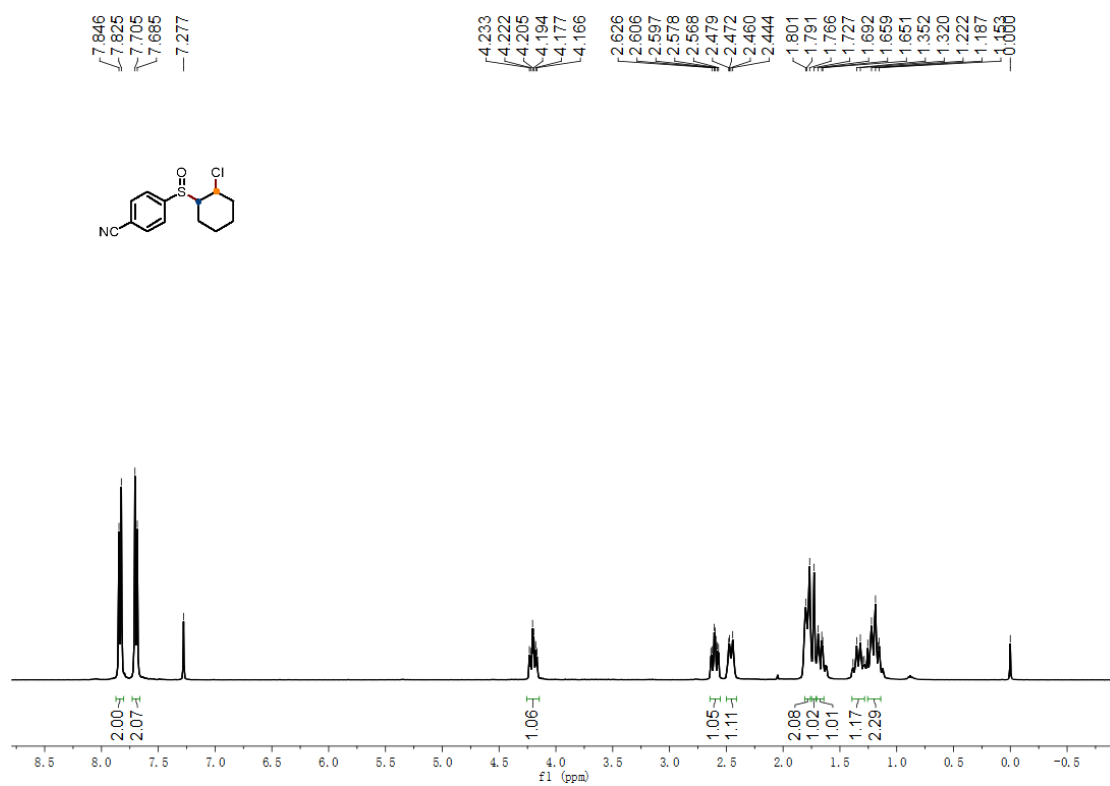

<sup>13</sup>C NMR spectrum of compound 4j

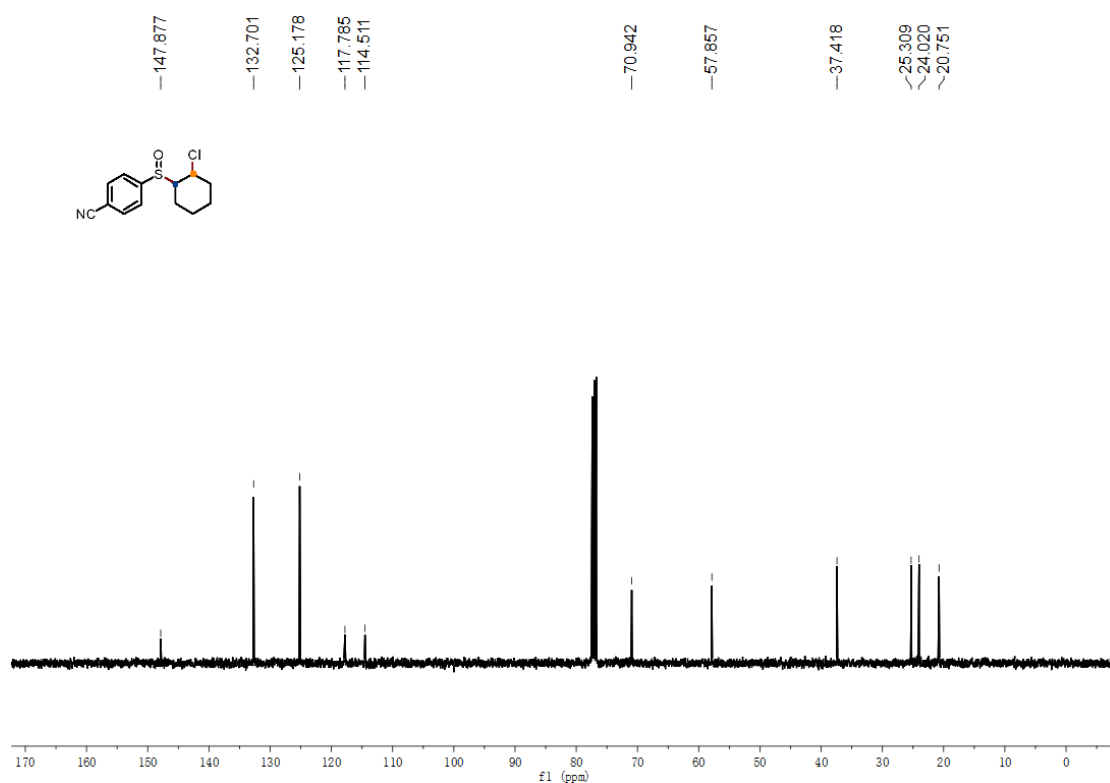

Diastereoisomer 2

<sup>1</sup>H NMR spectrum of compound 4j

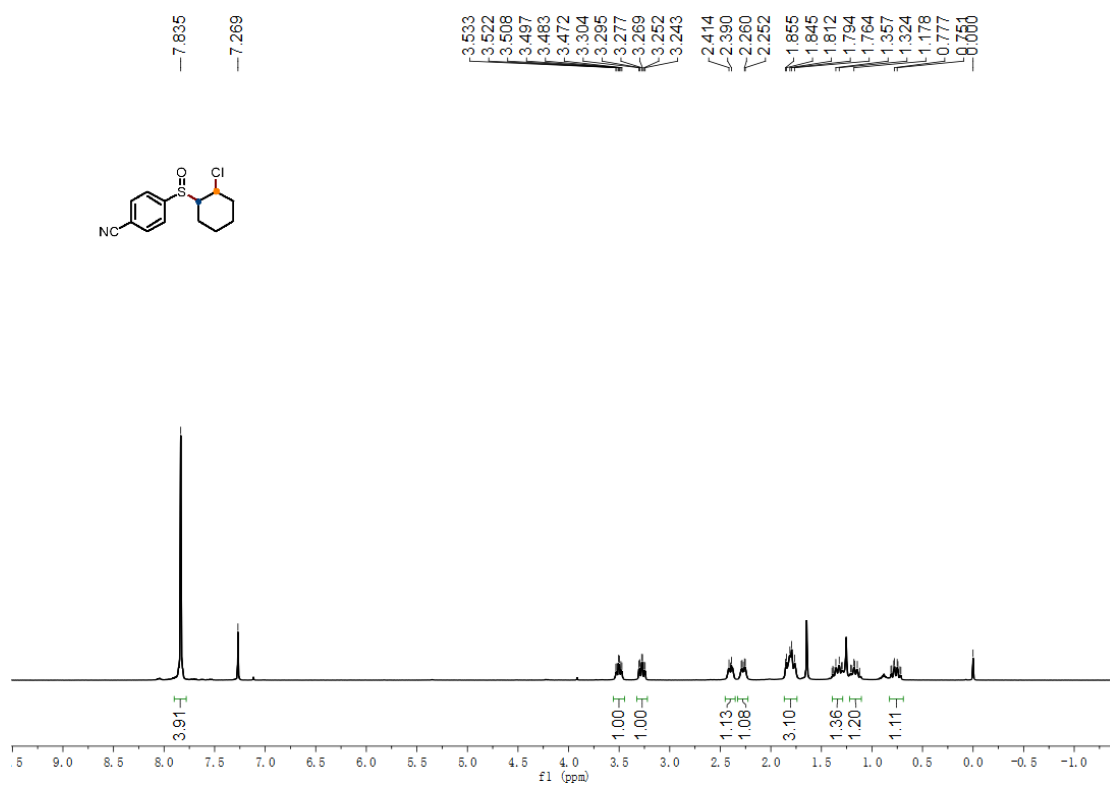

<sup>13</sup>C NMR spectrum of compound 4j

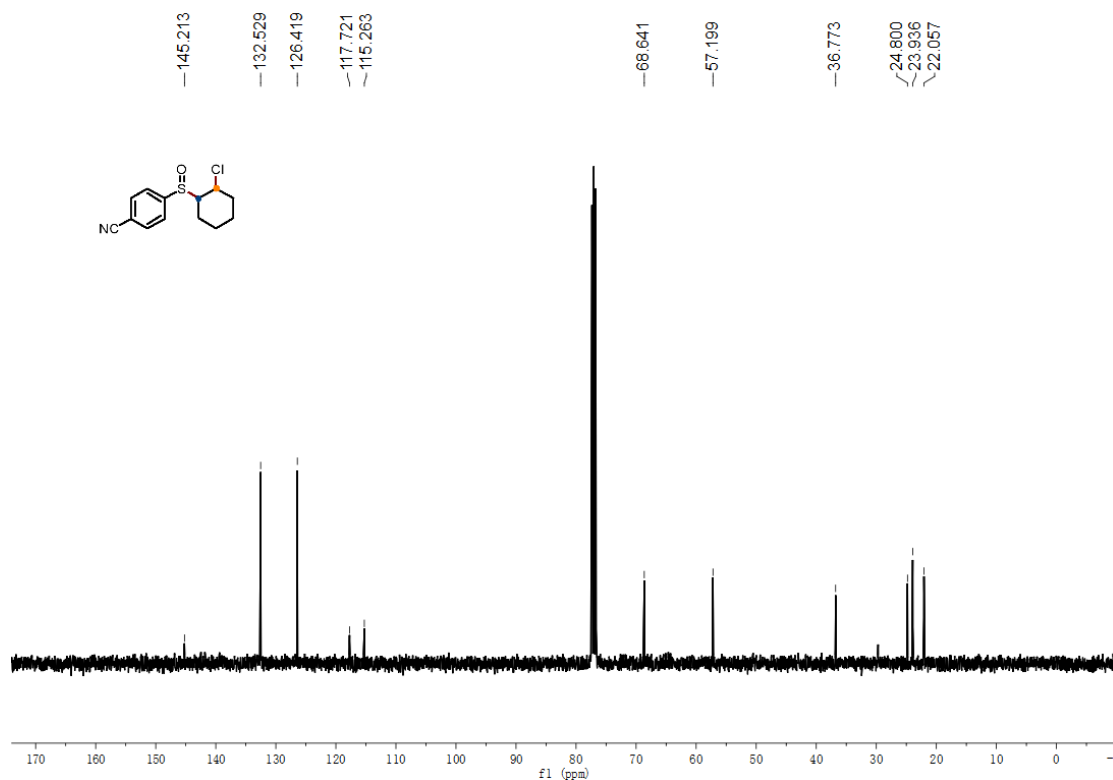

<sup>1</sup>H NMR spectrum of compound 4k

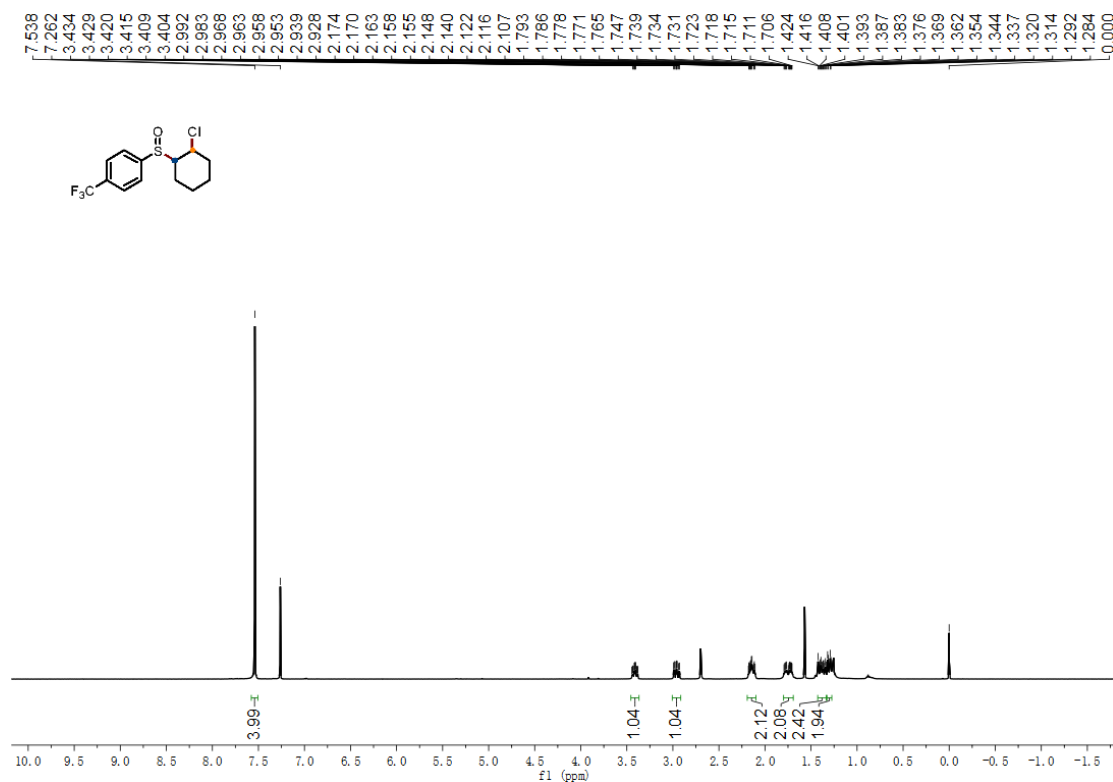

<sup>13</sup>C NMR spectrum of compound **4k**

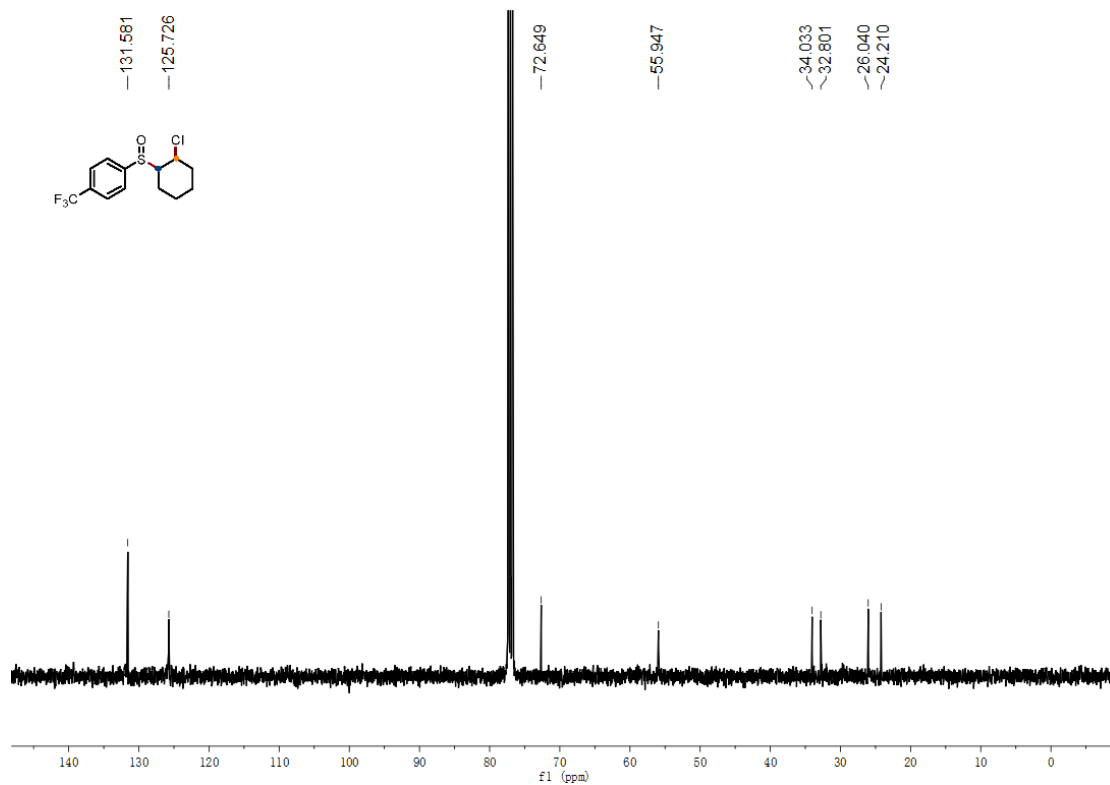

<sup>19</sup>F NMR spectrum of compound **4k**

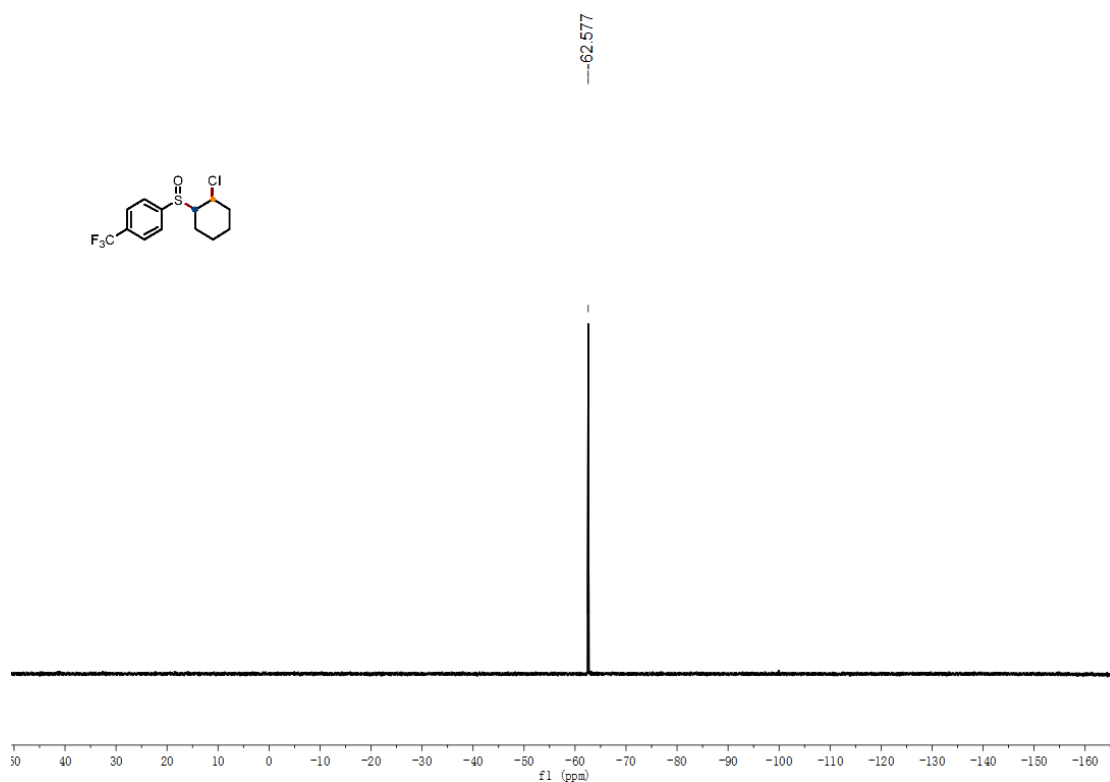

### <sup>1</sup>H NMR spectrum of compound 41

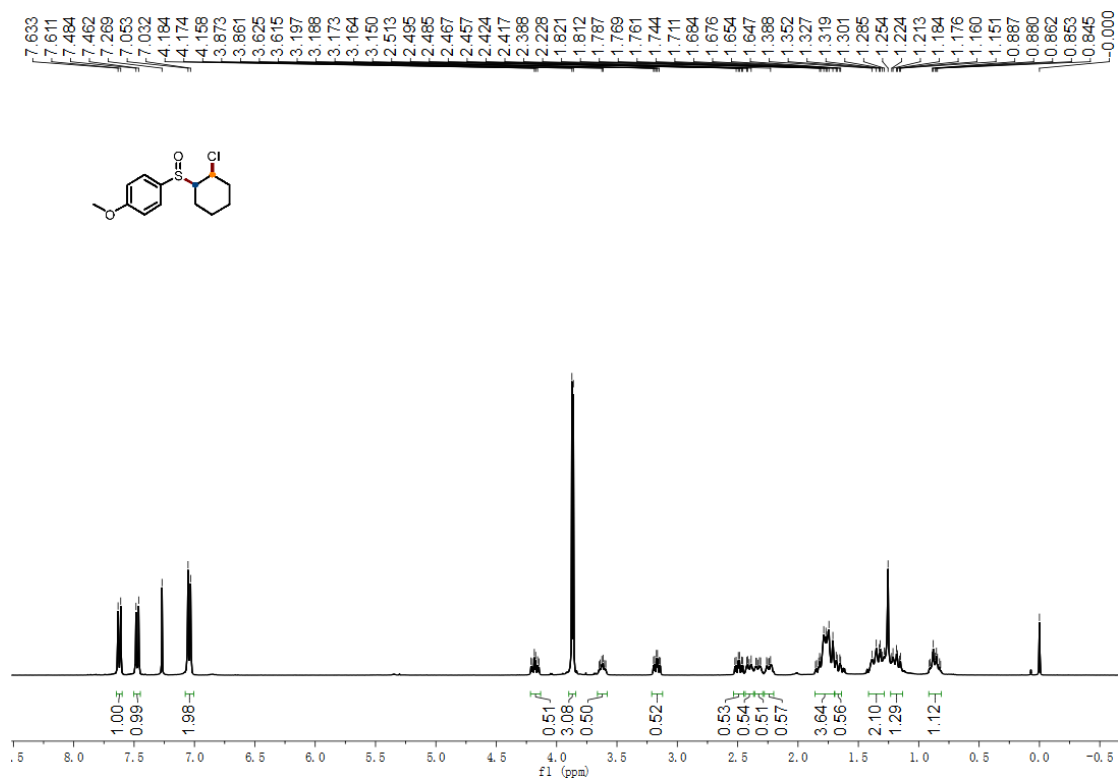

### <sup>13</sup>C NMR spectrum of compound 41

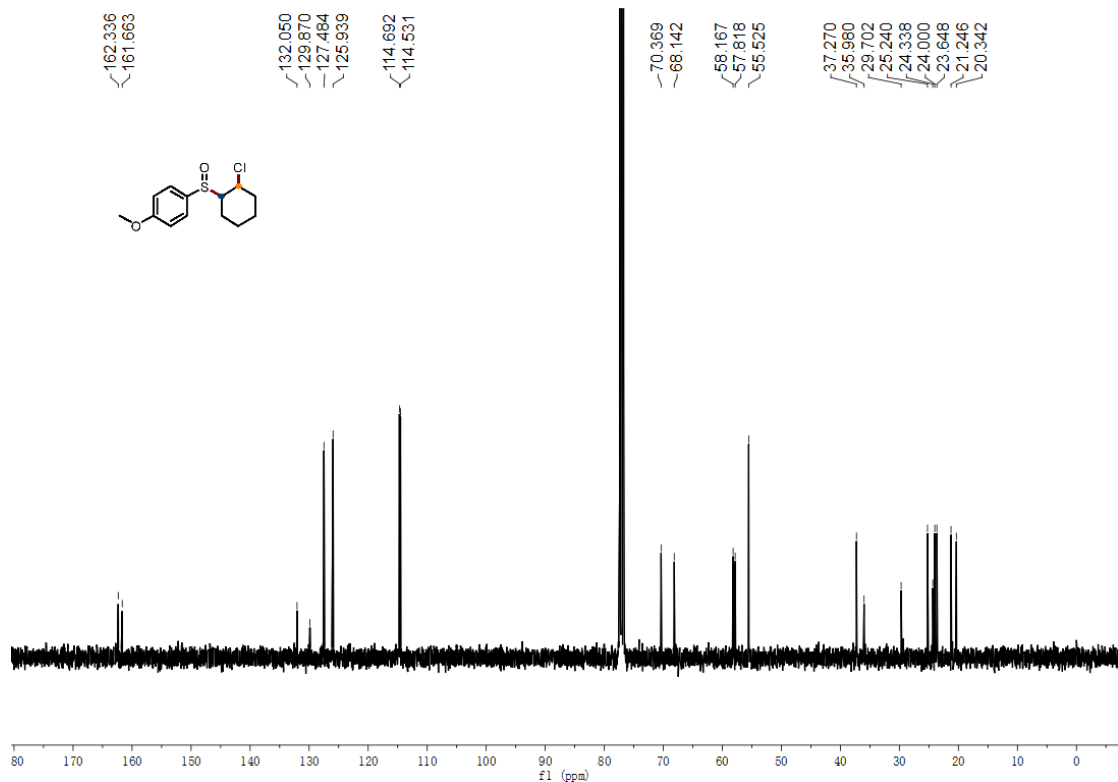

<sup>1</sup>H NMR spectrum of compound 4m

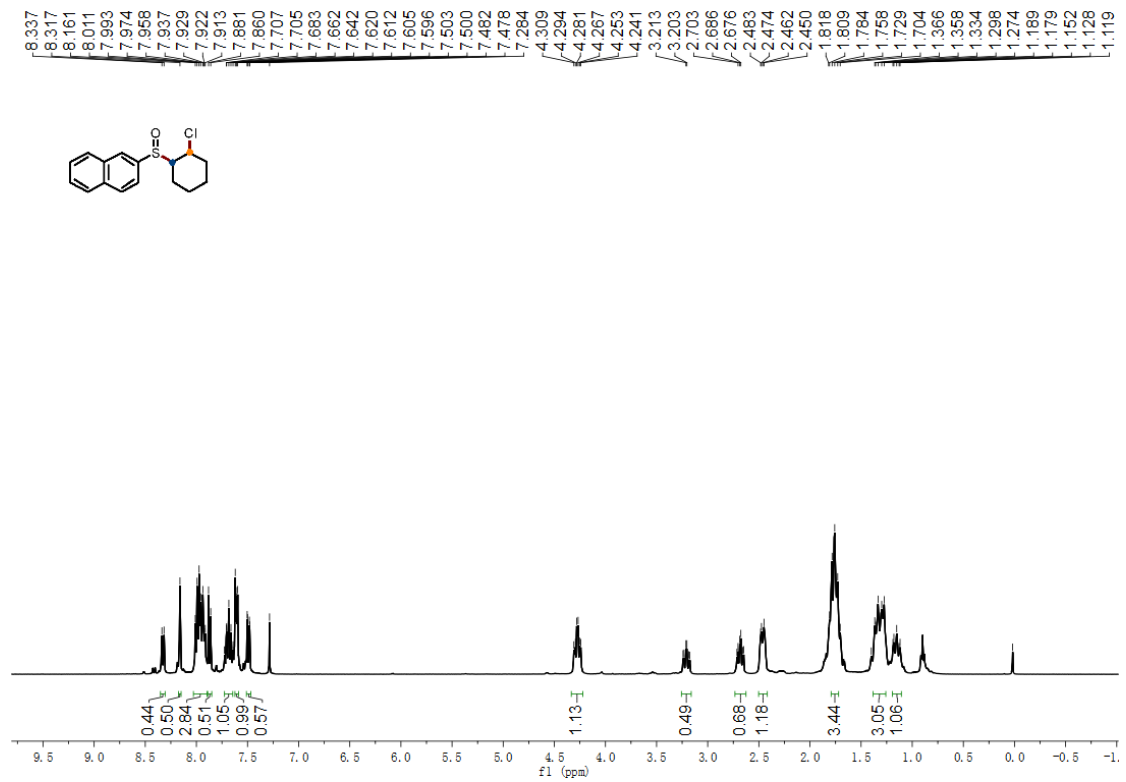

<sup>13</sup>C NMR spectrum of compound 4m

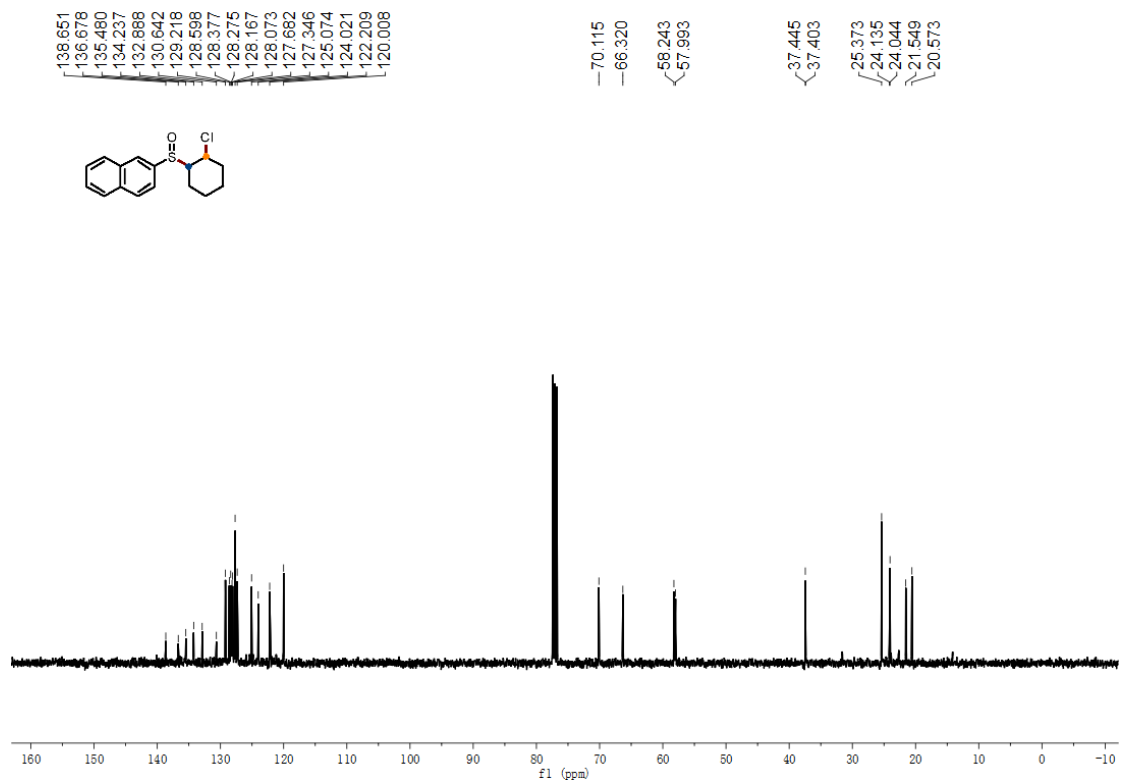

<sup>1</sup>H NMR spectrum of compound **4n**

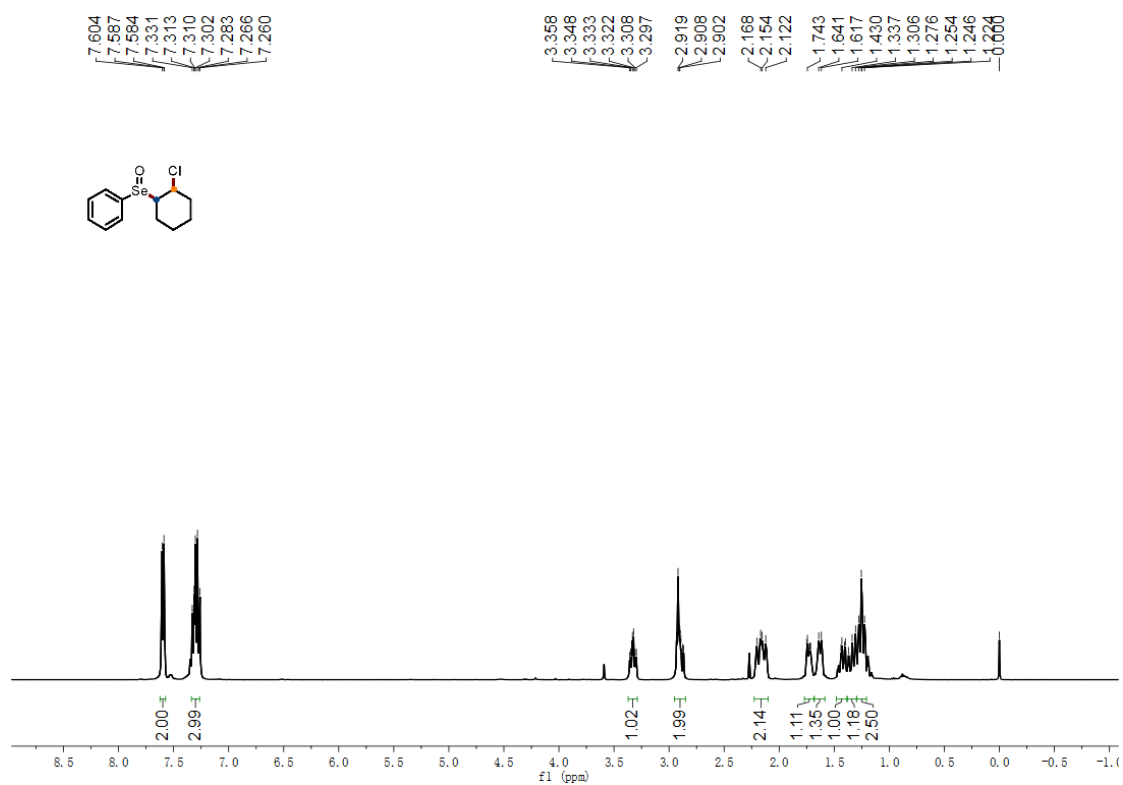

<sup>13</sup>C NMR spectrum of compound **4n**

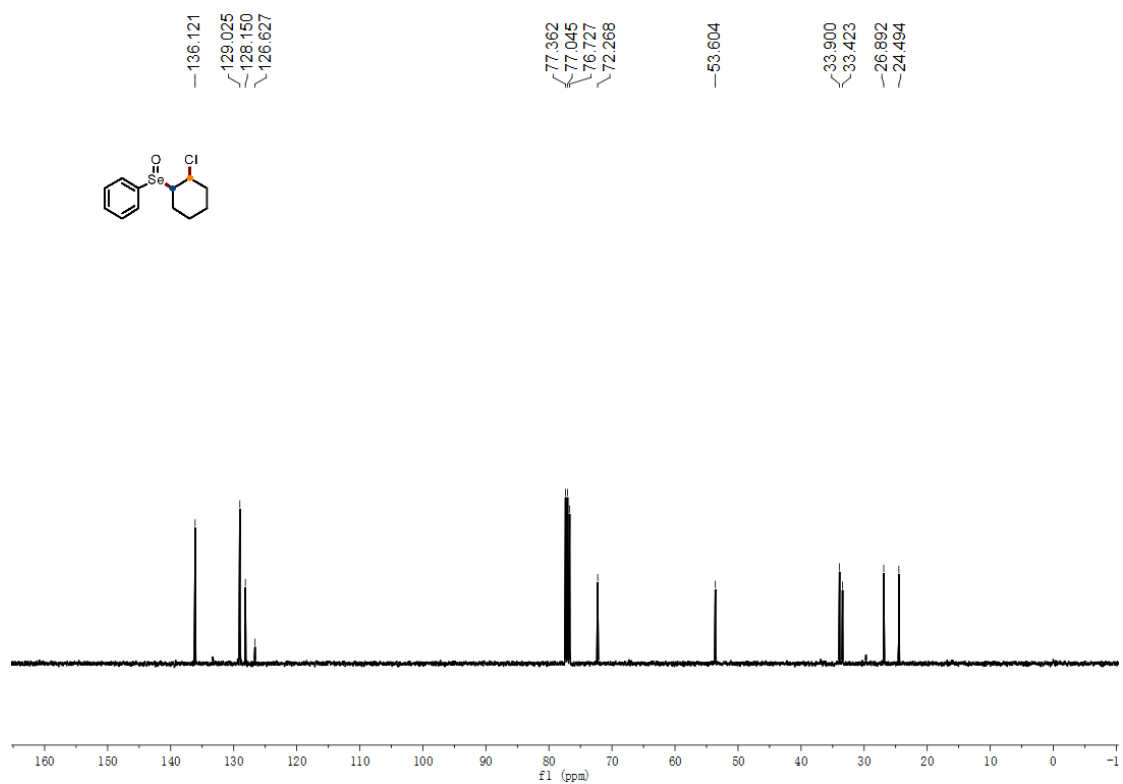

### <sup>1</sup>H NMR spectrum of compound 4o

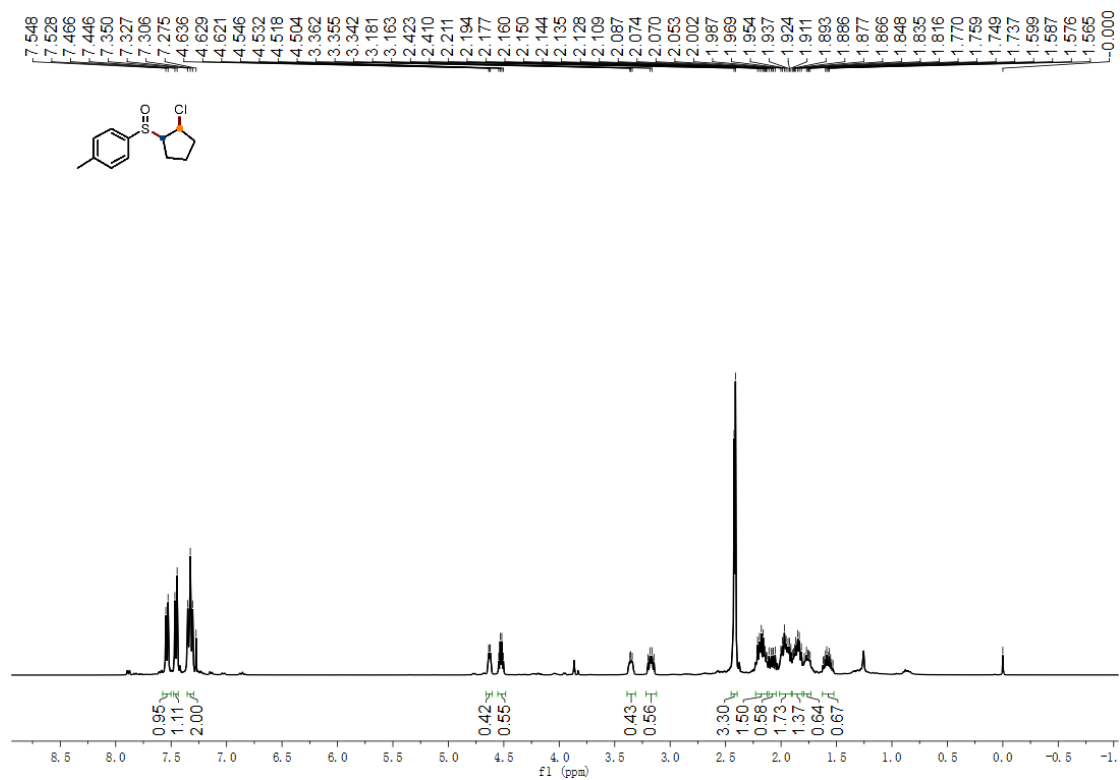

### <sup>13</sup>C NMR spectrum of compound 4o

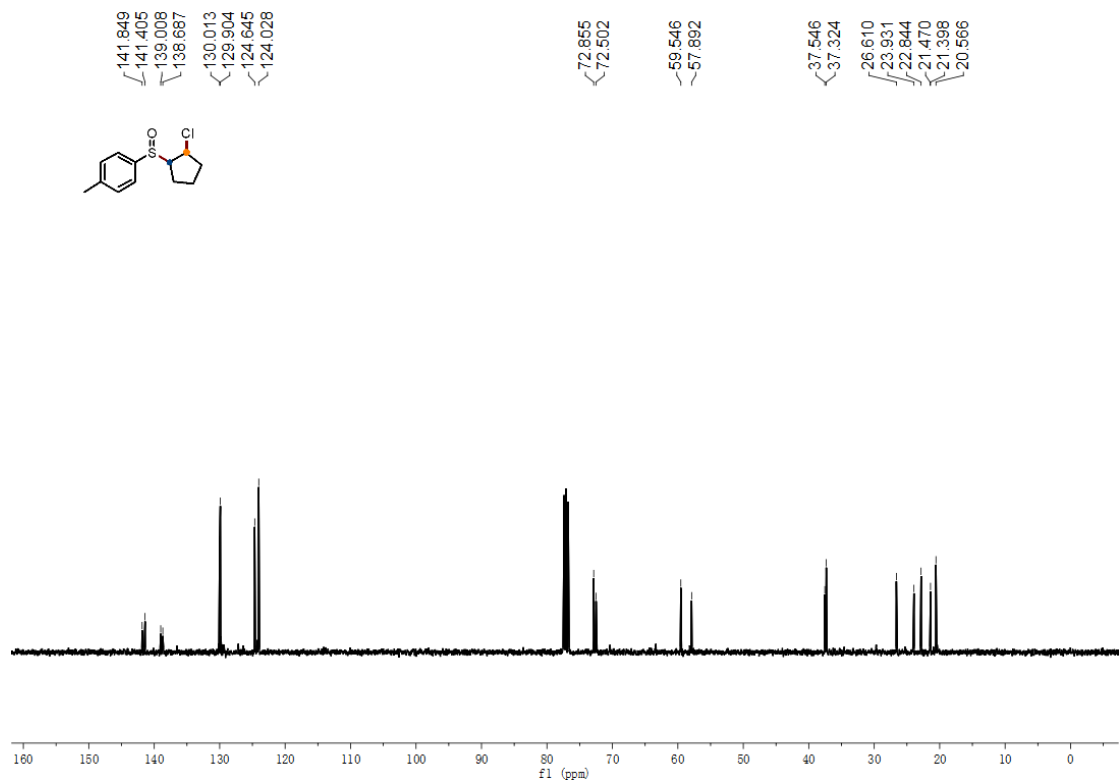



### <sup>1</sup>H NMR spectrum of compound 4p

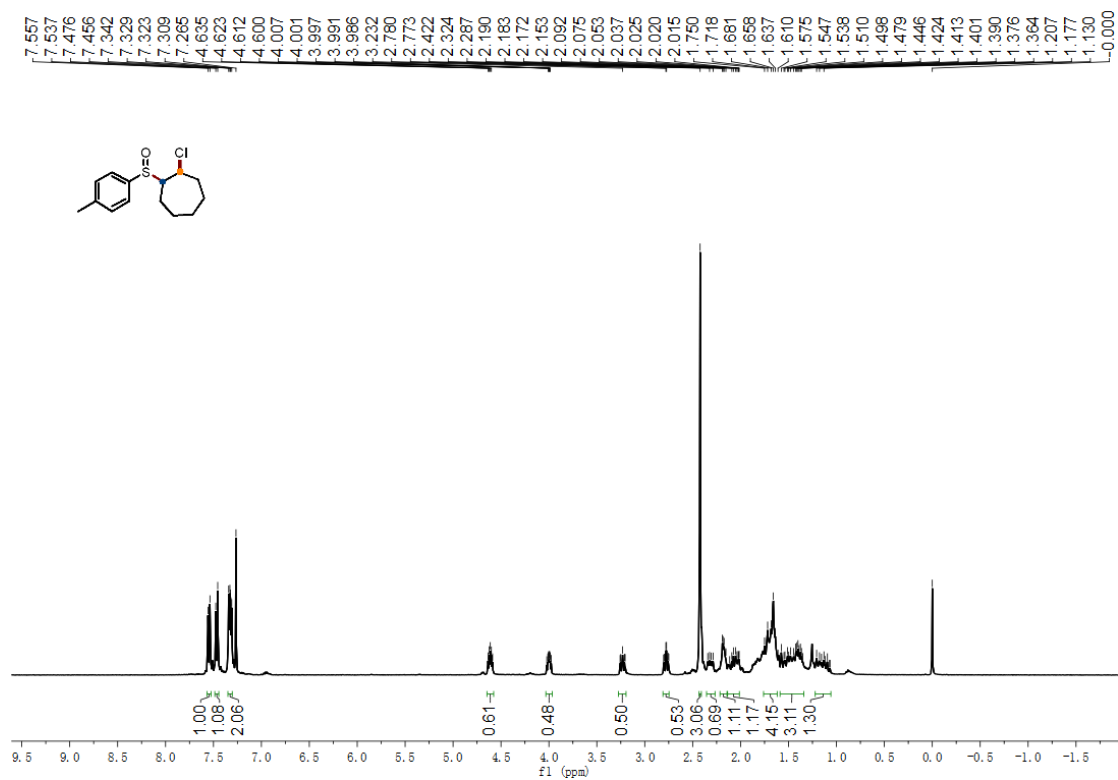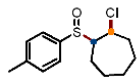

### <sup>13</sup>C NMR spectrum of compound 4p

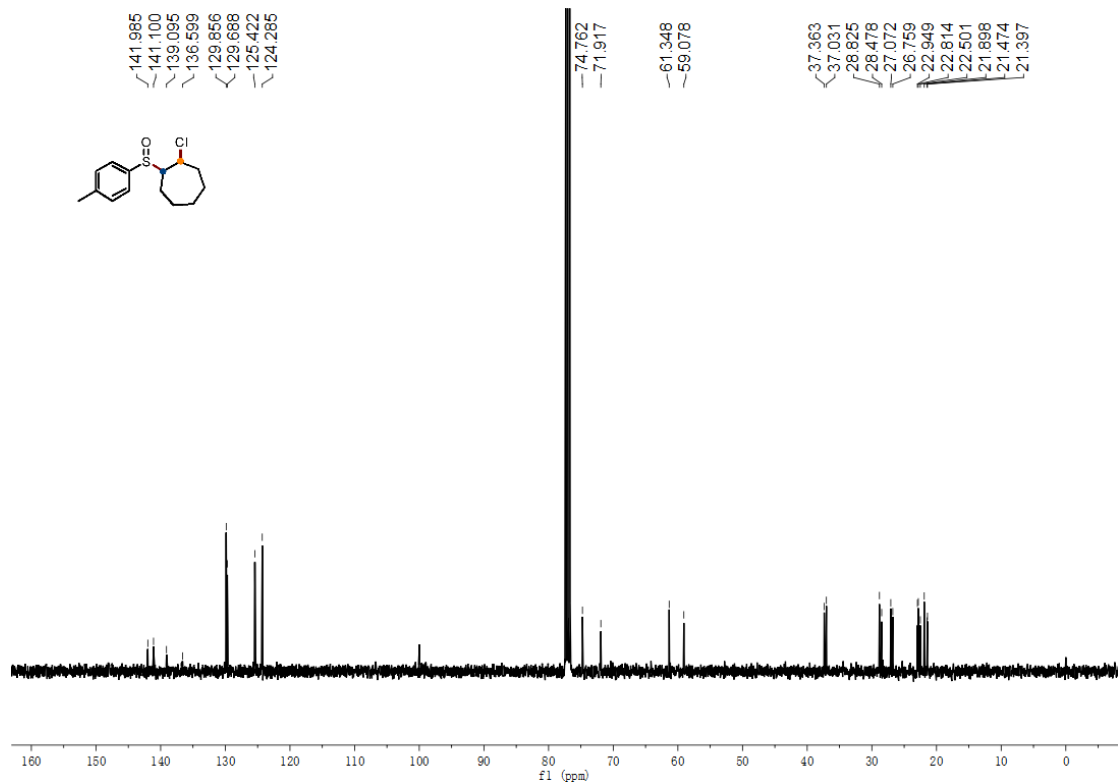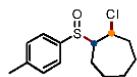

### <sup>1</sup>H NMR spectrum of compound 4q

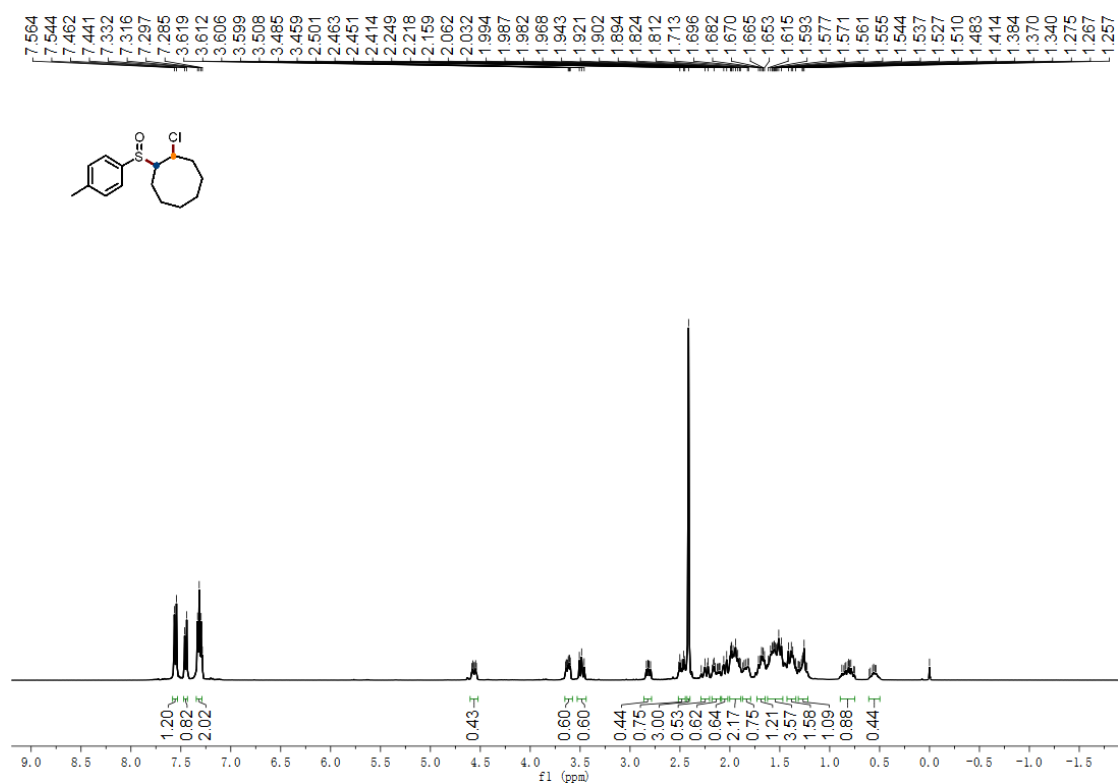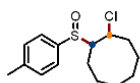

### <sup>13</sup>C NMR spectrum of compound 4q

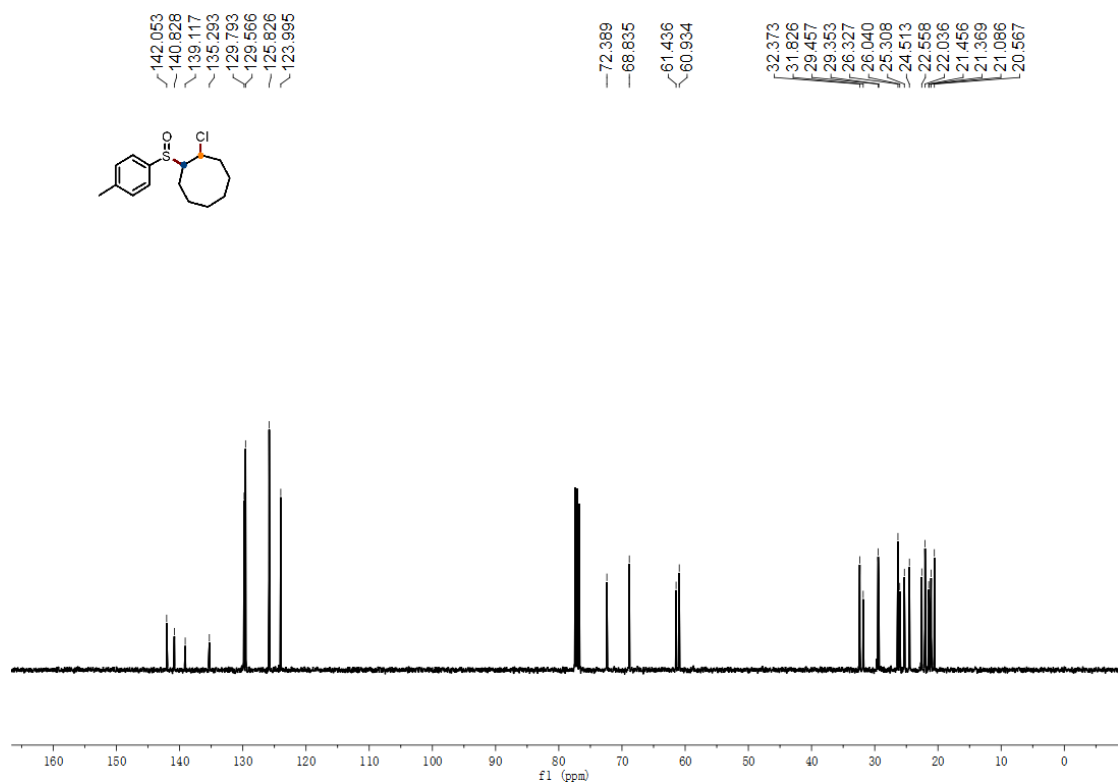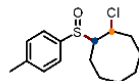

<sup>1</sup>H NMR spectrum of compound 4r

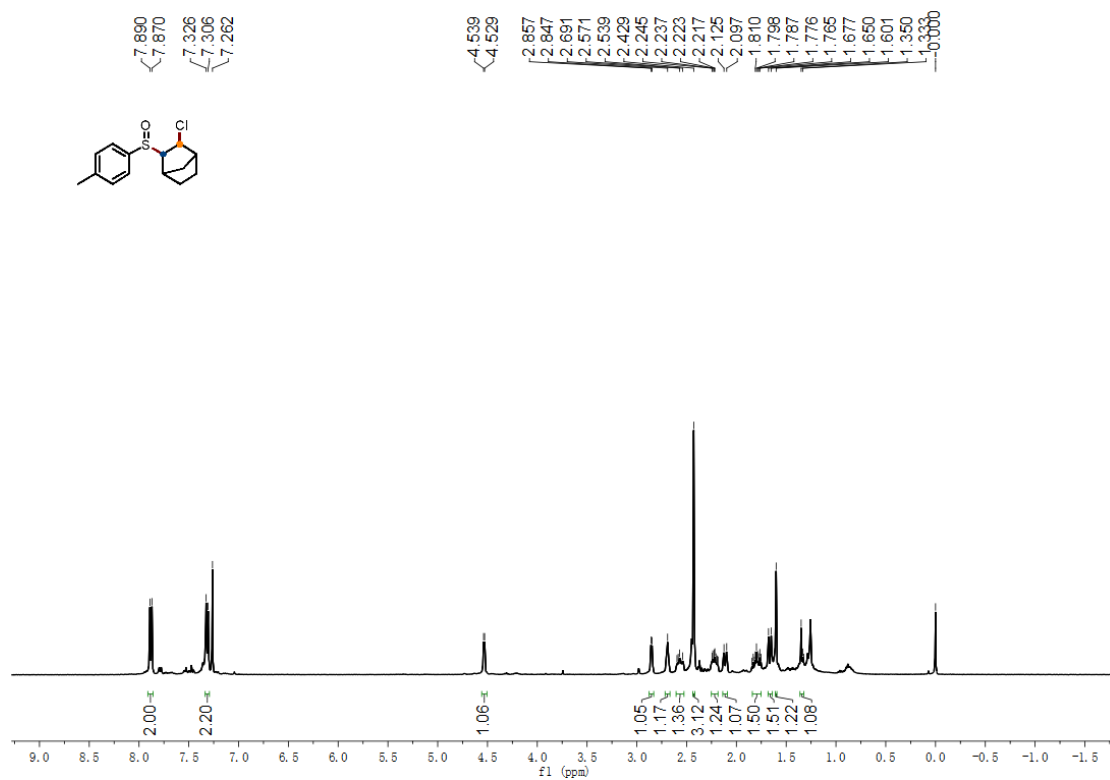

<sup>13</sup>C NMR spectrum of compound 4r

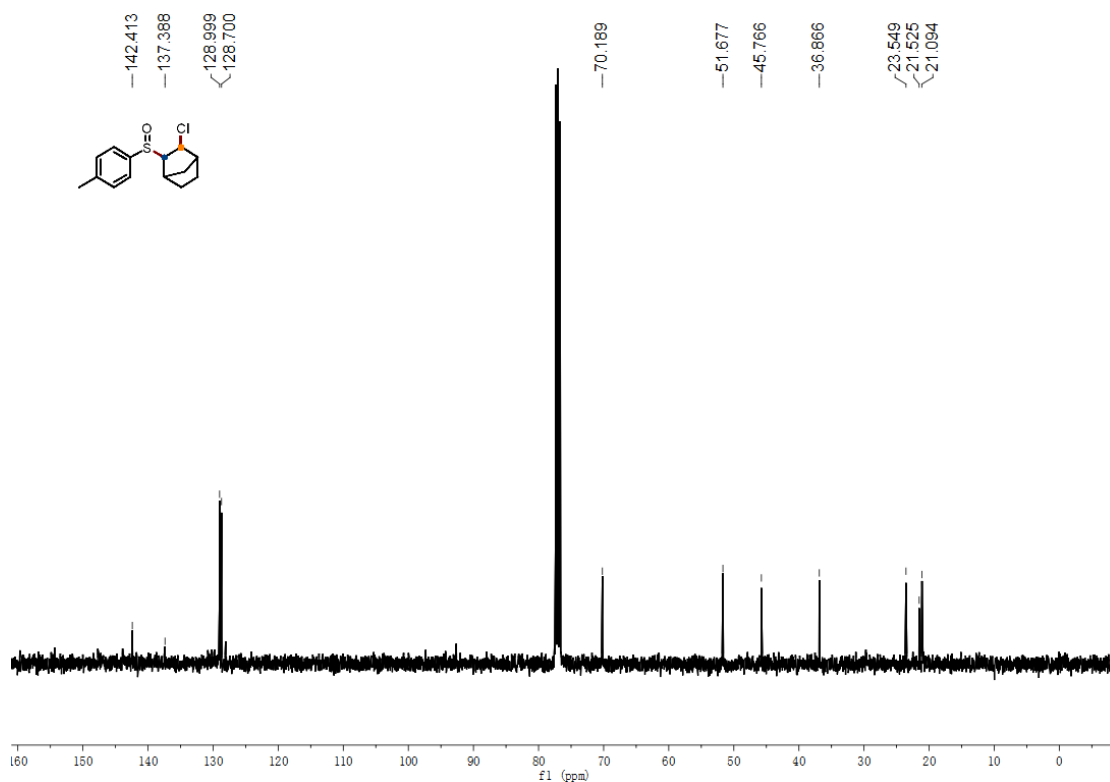

<sup>1</sup>H NMR spectrum of compound 4s

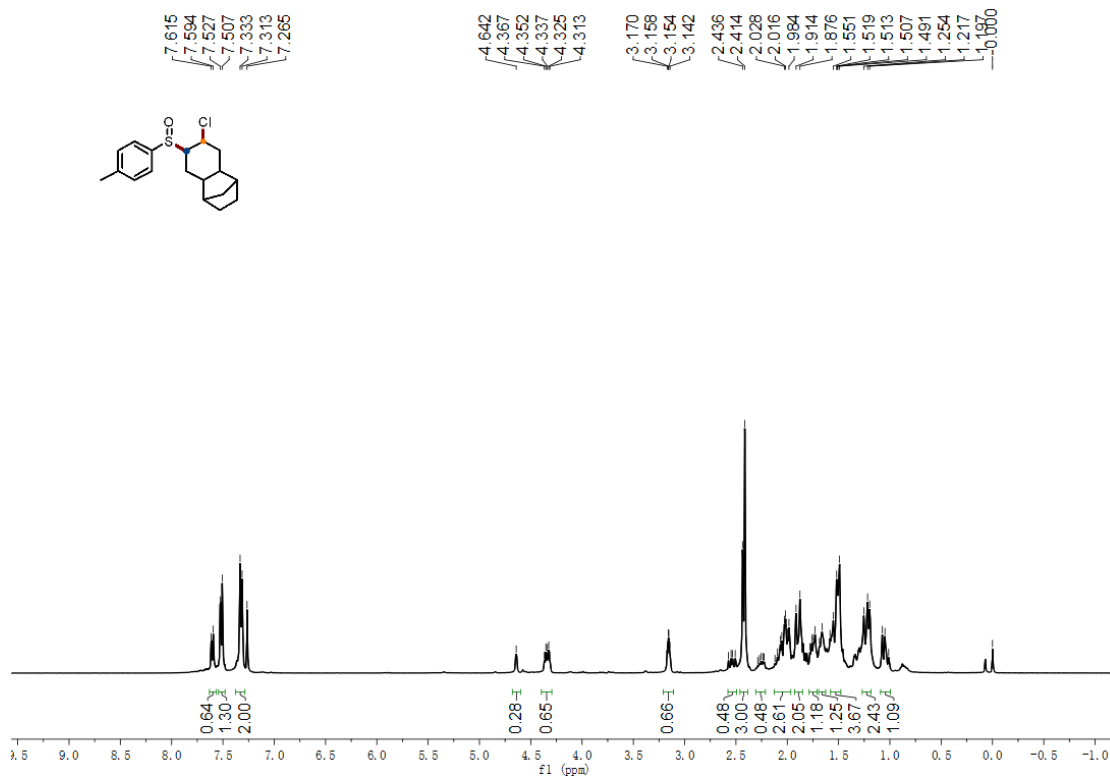

<sup>13</sup>C NMR spectrum of compound 4s

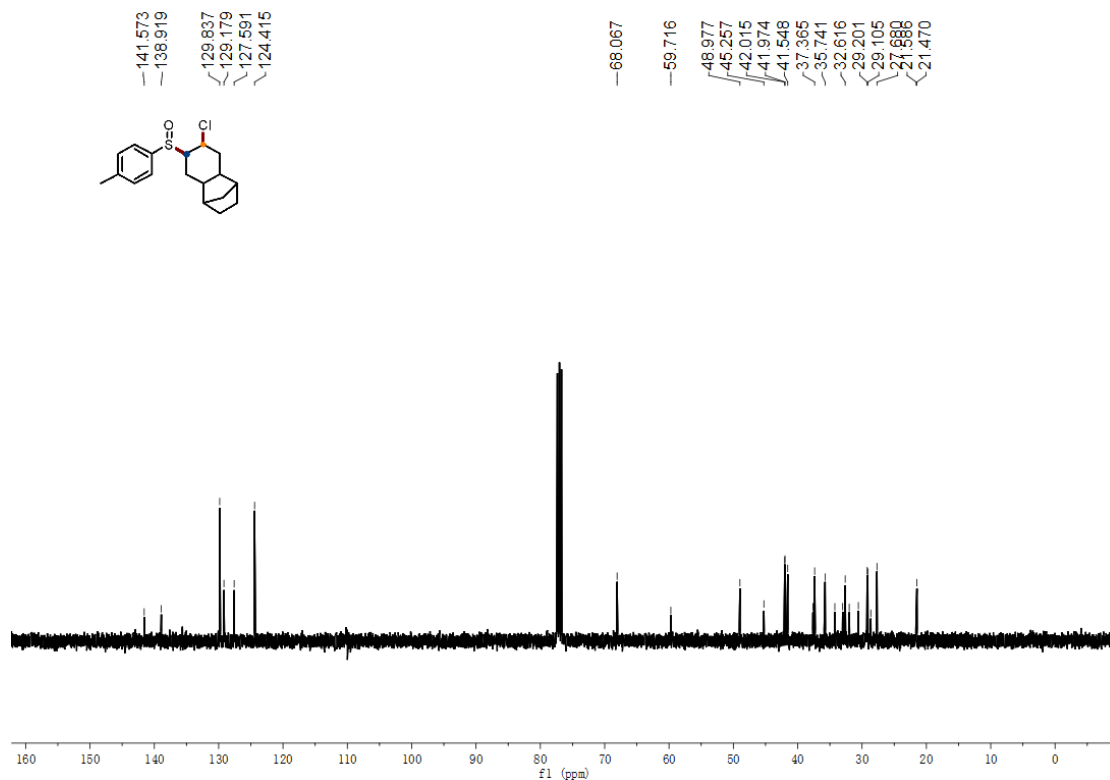

### Diastereoisomer 1

<sup>1</sup>H NMR spectrum of compound 4t

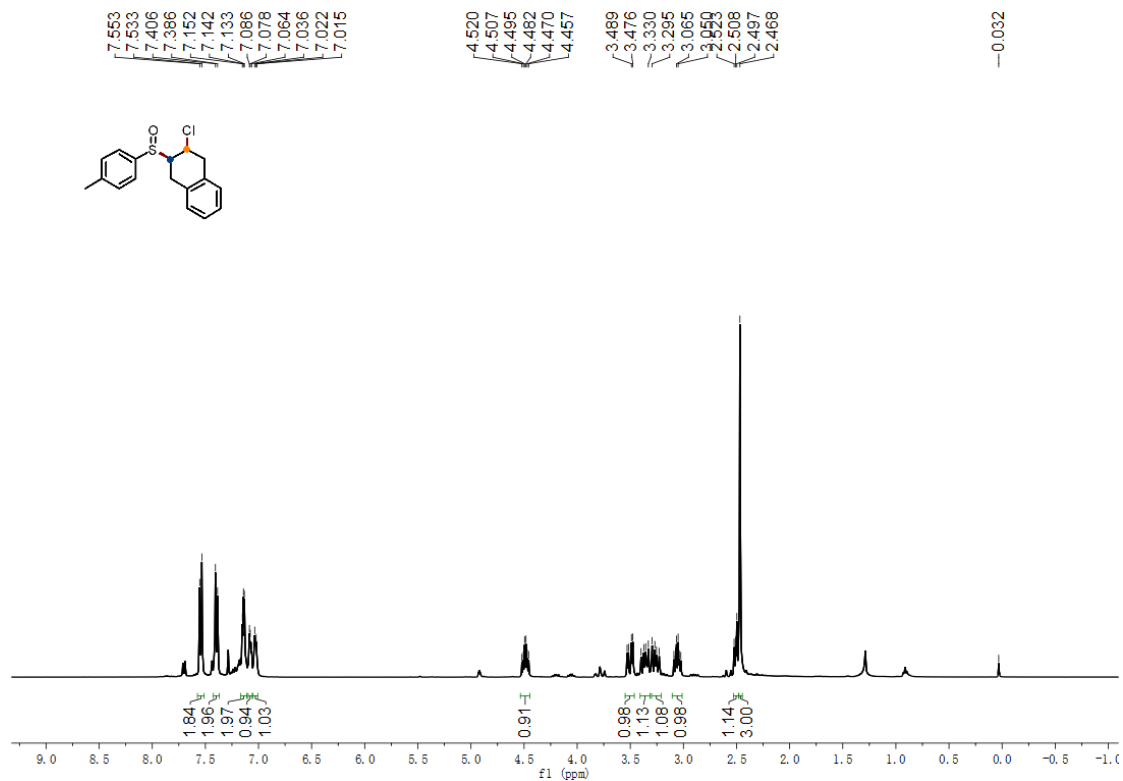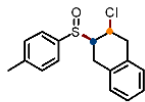

<sup>13</sup>C NMR spectrum of compound 4t

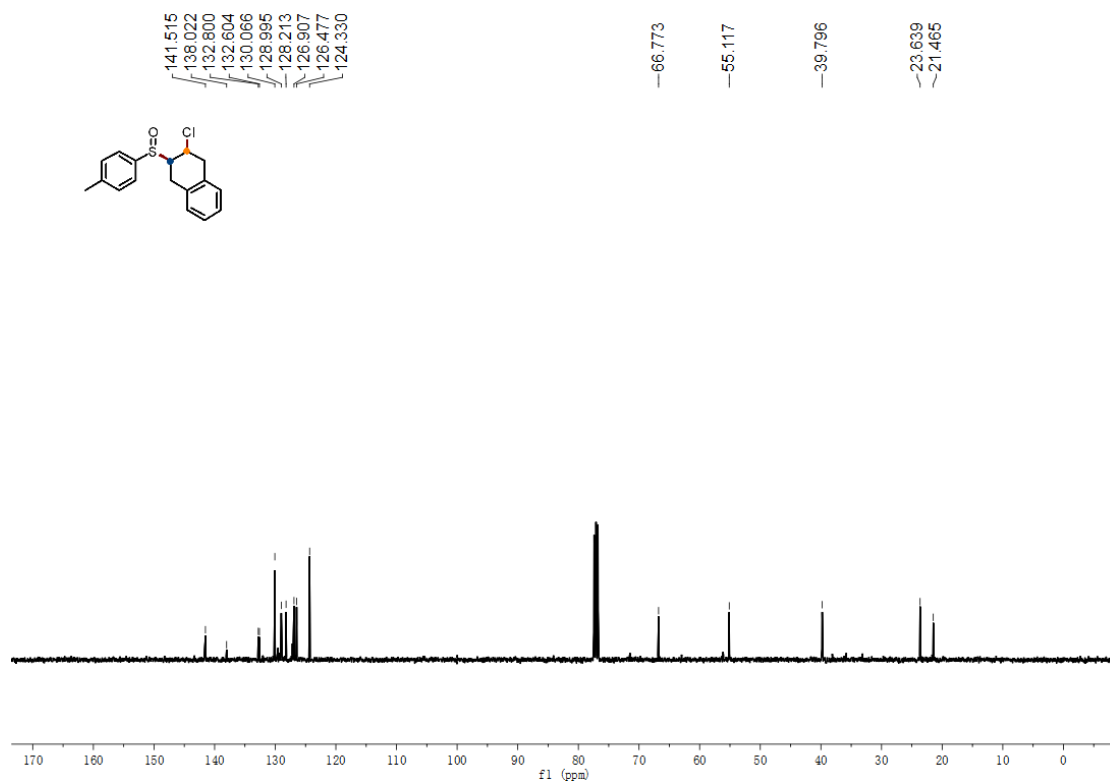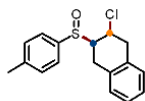

### Diastereoisomer 2

<sup>1</sup>H NMR spectrum of compound 4t

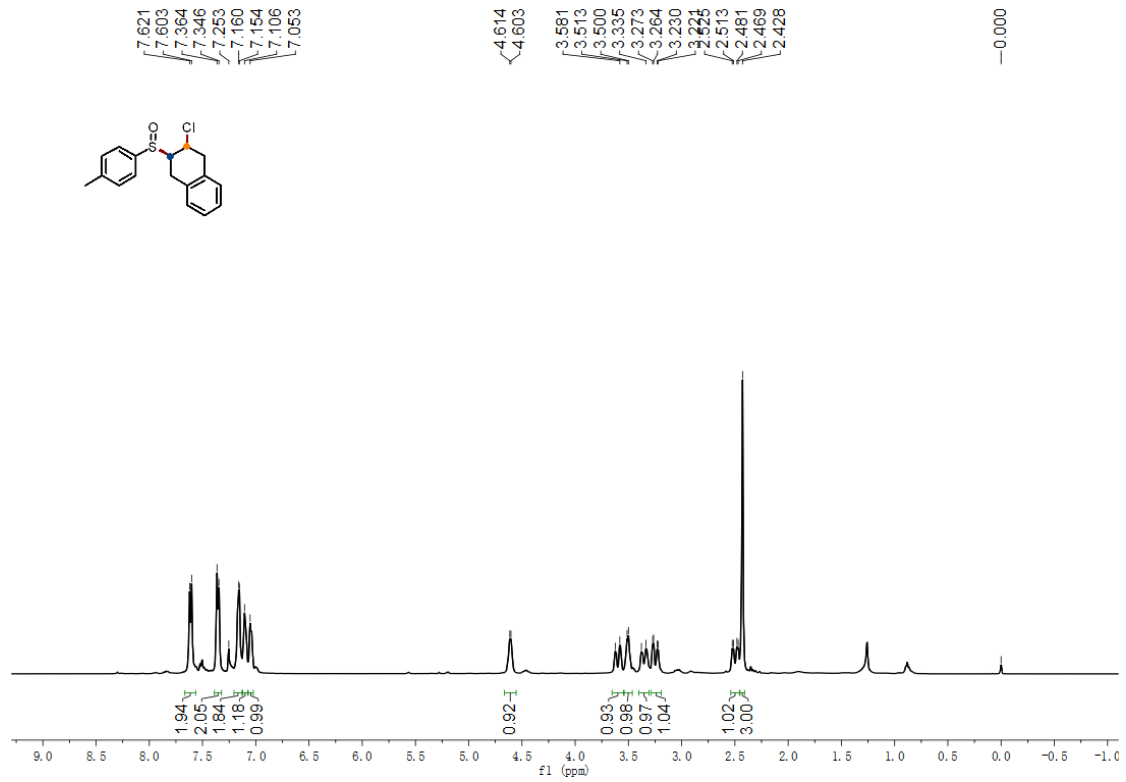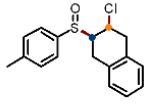

<sup>13</sup>C NMR spectrum of compound 4t

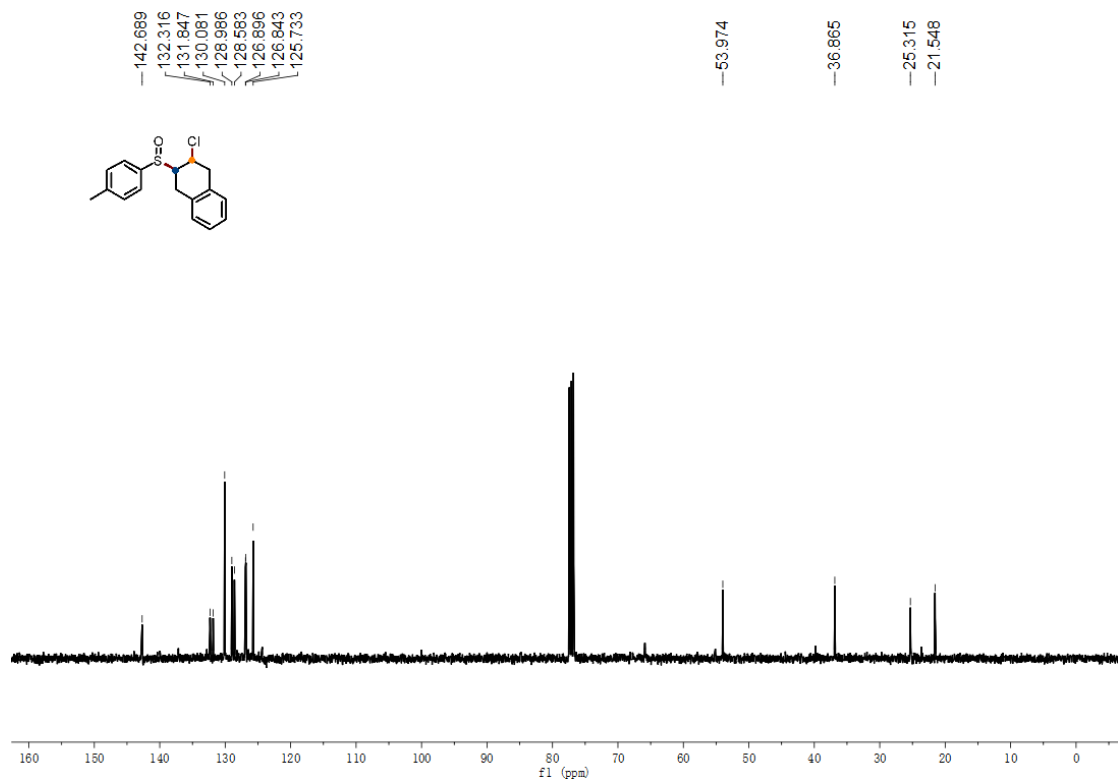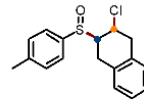

<sup>1</sup>H NMR spectrum of compound **4u**

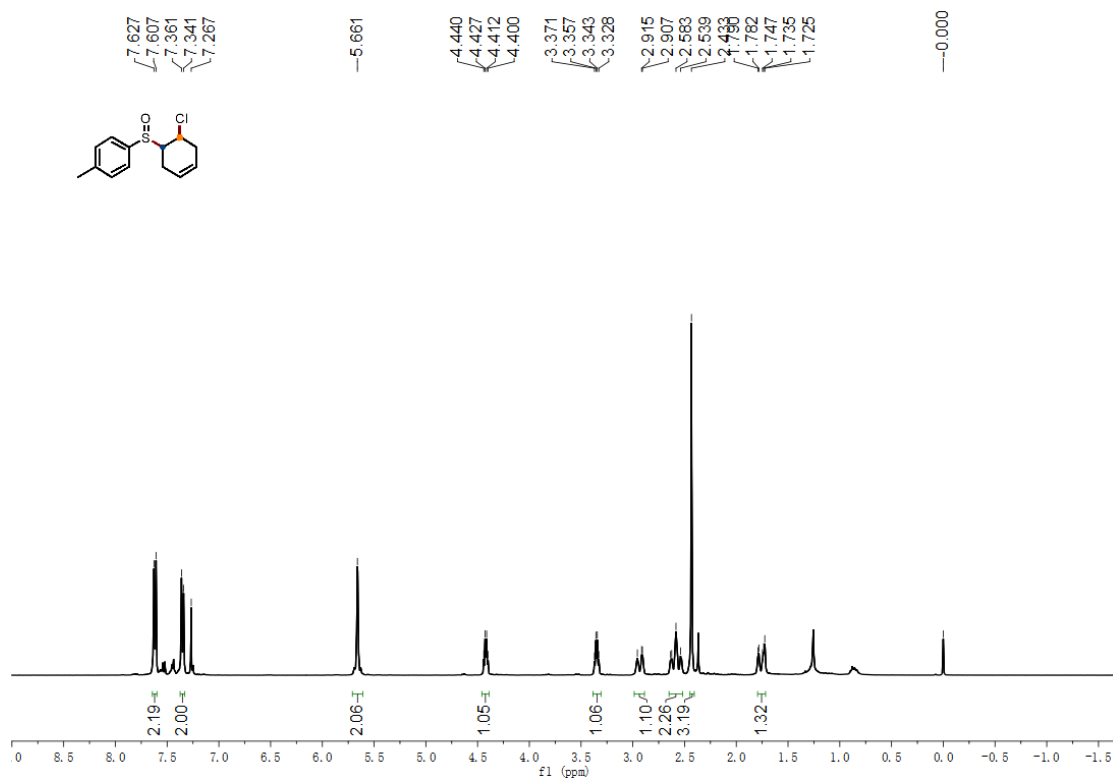

<sup>13</sup>C NMR spectrum of compound **4u**

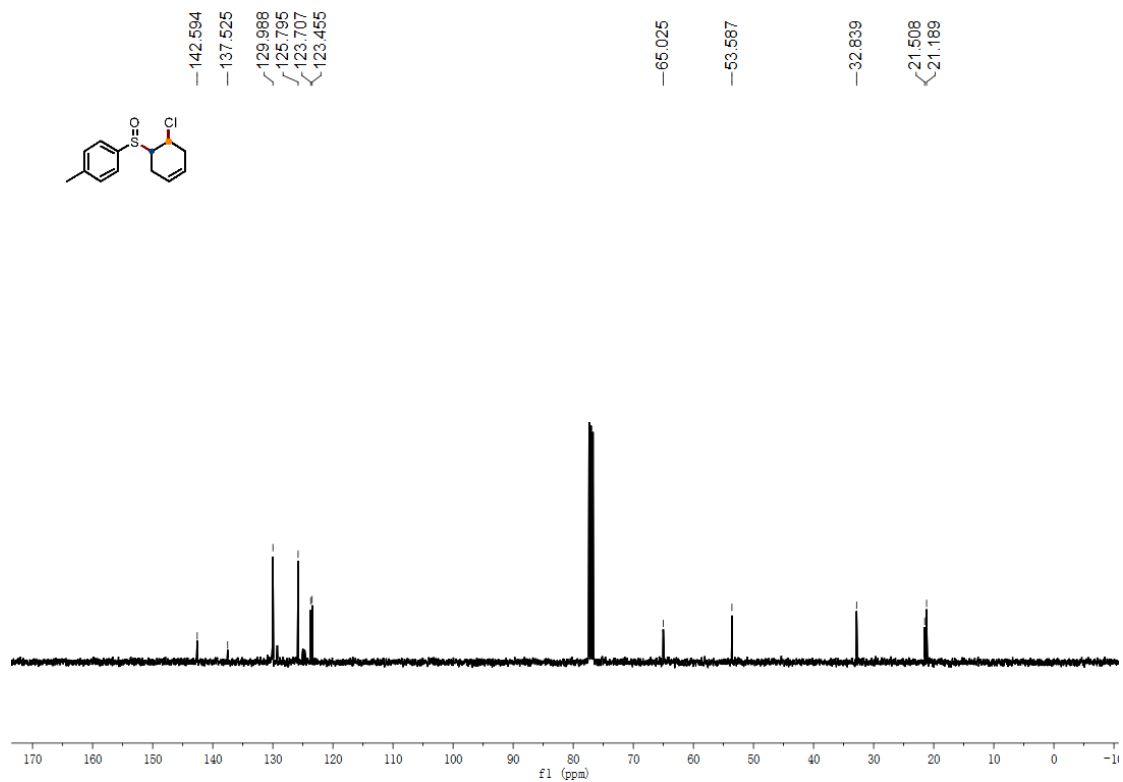

<sup>1</sup>H NMR spectrum of compound 4v

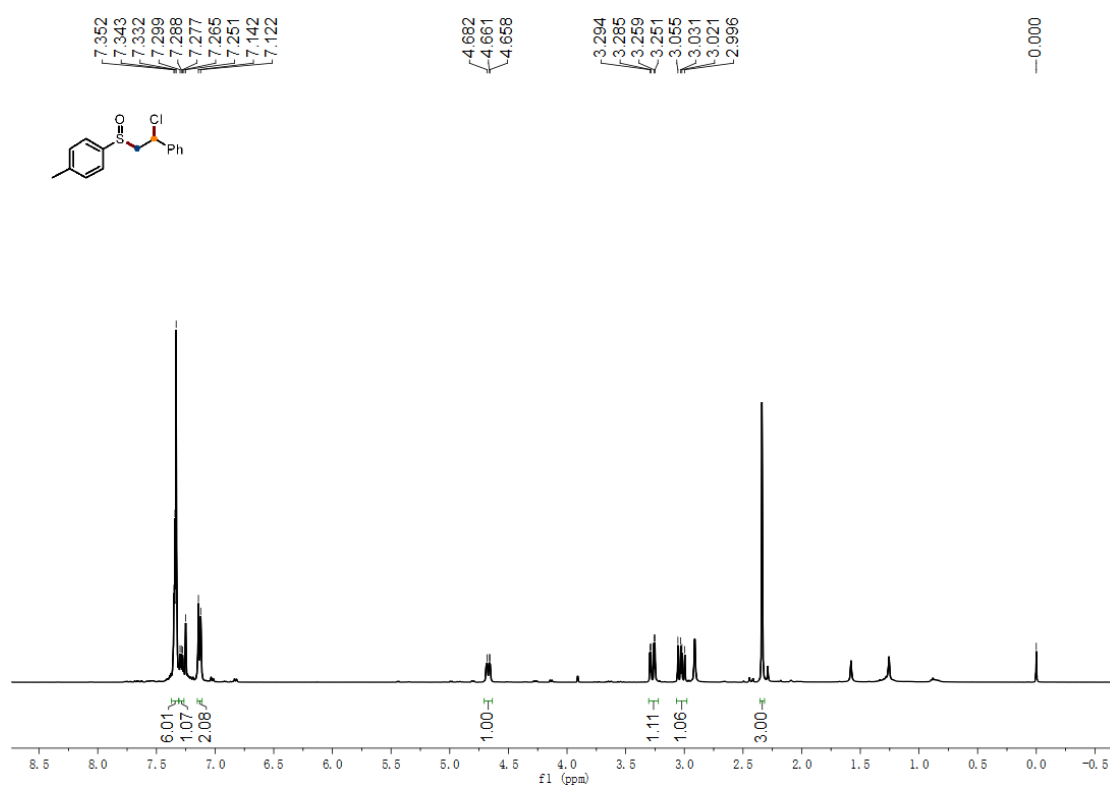

<sup>13</sup>C NMR spectrum of compound 4v

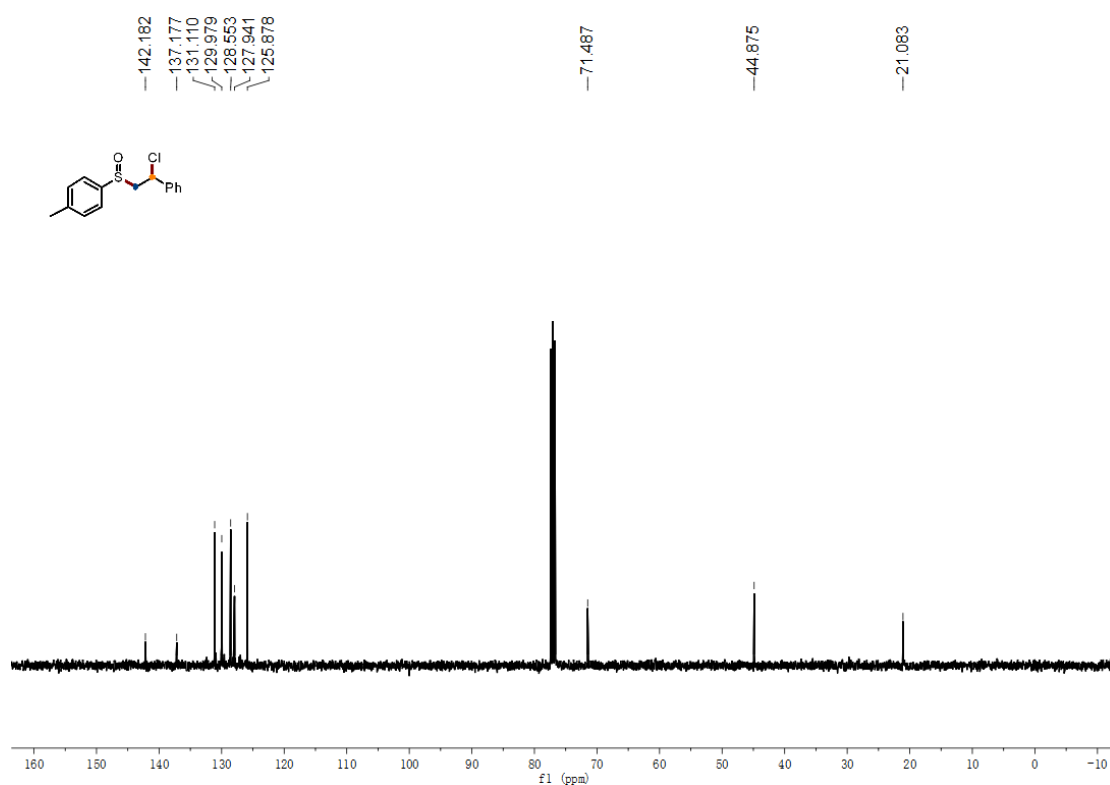



<sup>1</sup>H NMR spectrum of compound **4w**

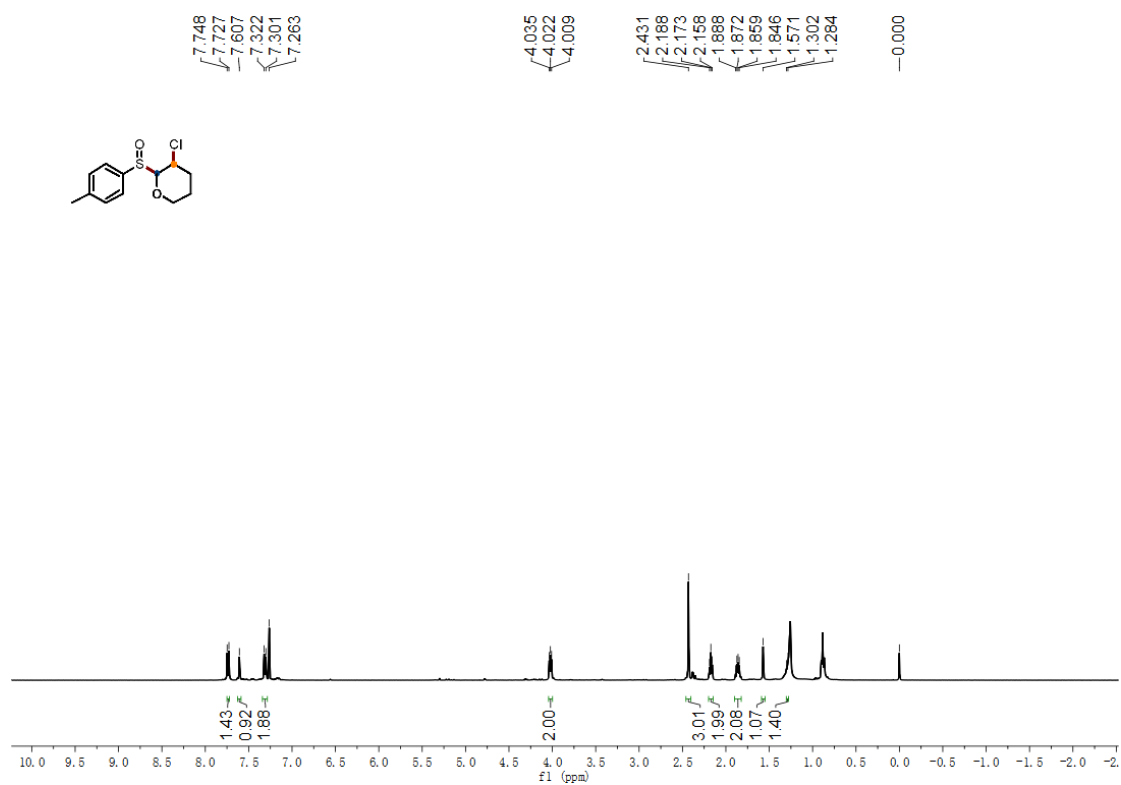

<sup>13</sup>C NMR spectrum of compound **4w**

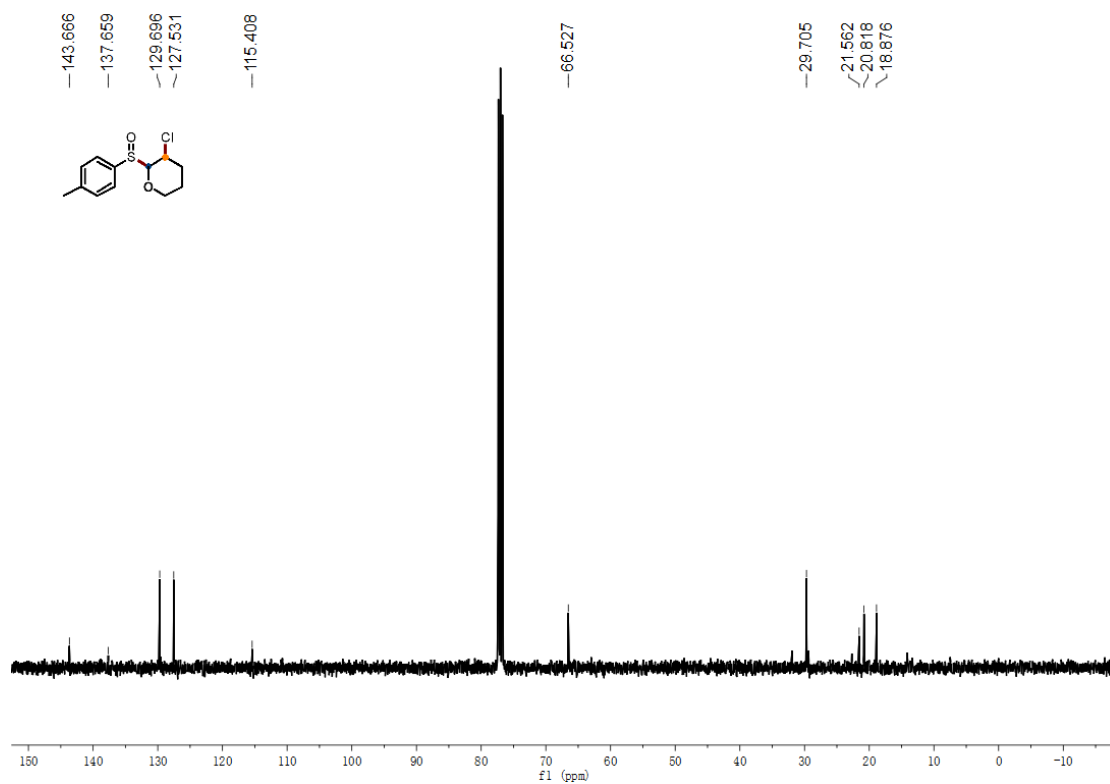

<sup>1</sup>H NMR spectrum of compound 6

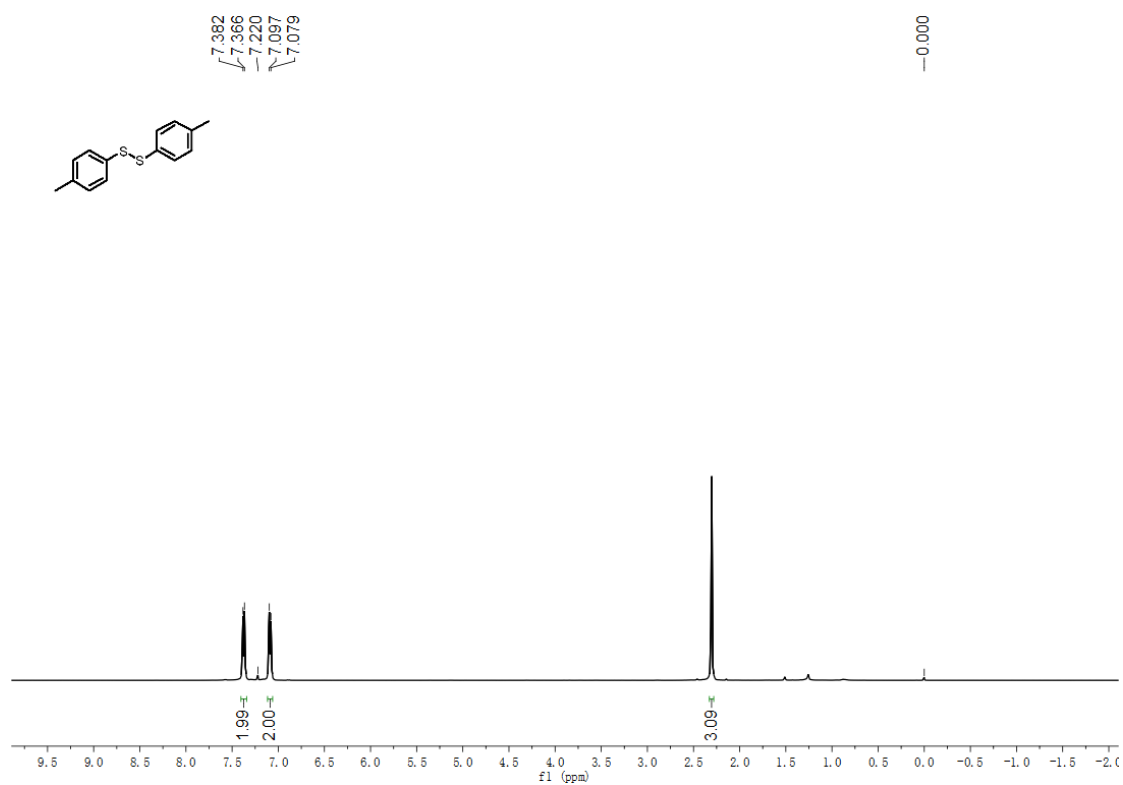

<sup>13</sup>C NMR spectrum of compound 6

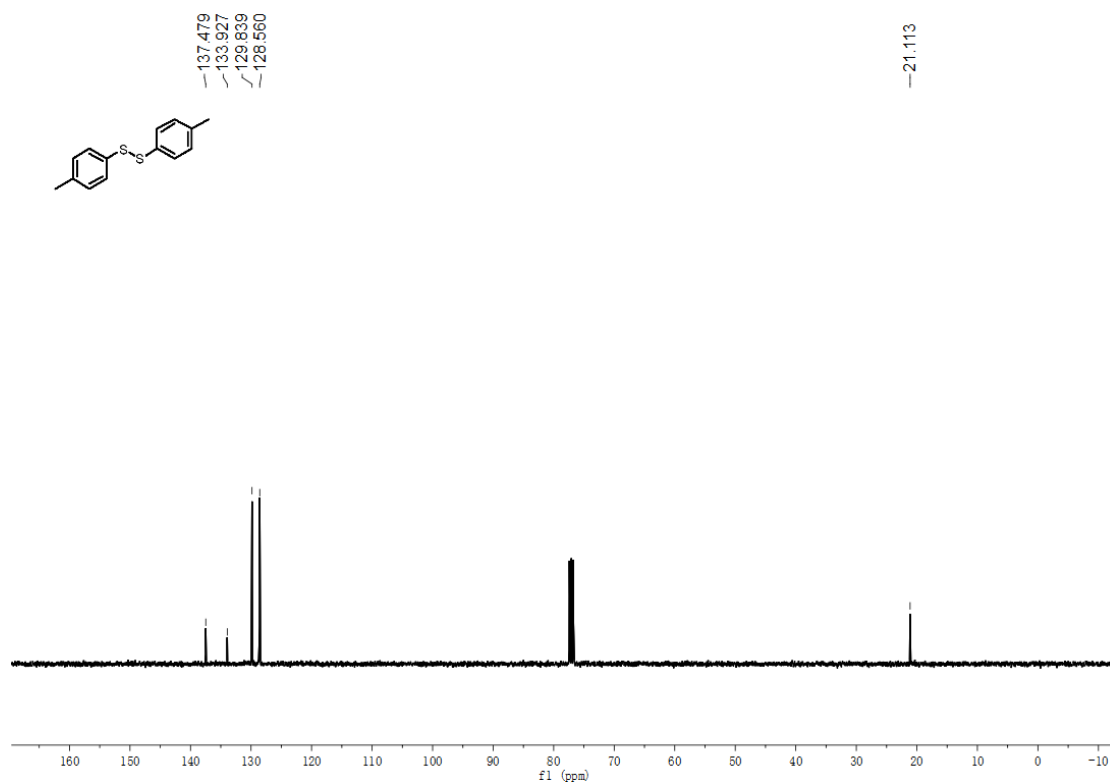

## 6. Reference:

1. S. Liu, Z. Qi, Z. Zhang and B. Qian, *Org. Lett.* **2019**, *21*, 7722-7725.
